# Supplementary figures and images for: Transferable machine learning interatomic potential for carbon hydrogen systems
Source: Royal Society of Chemistry journal article supplement (doi:10.1039/d4cp02300e), 2024-01-01

(a)  $\Delta E = 1.0$  eV/atom

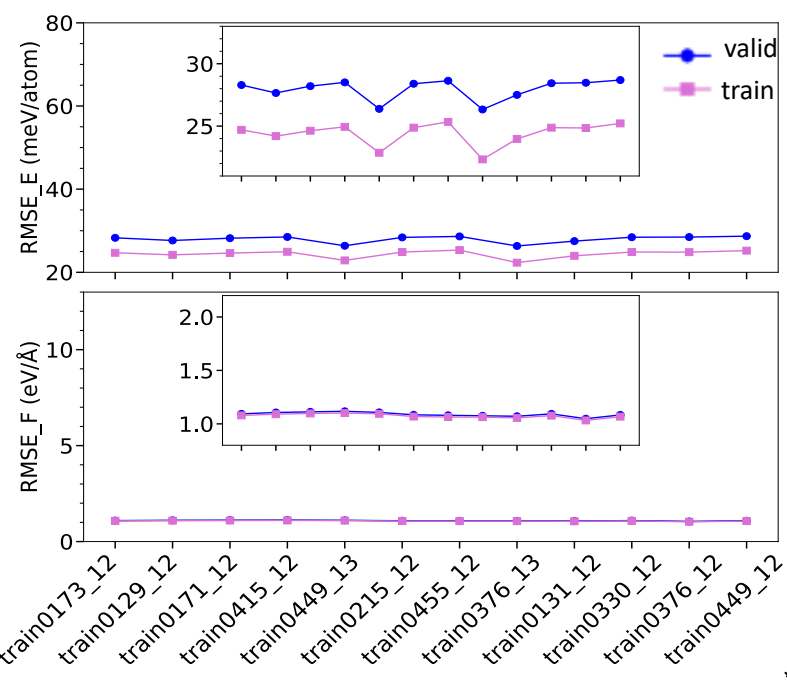

(b)  $\Delta E = 1.5$  eV/atom

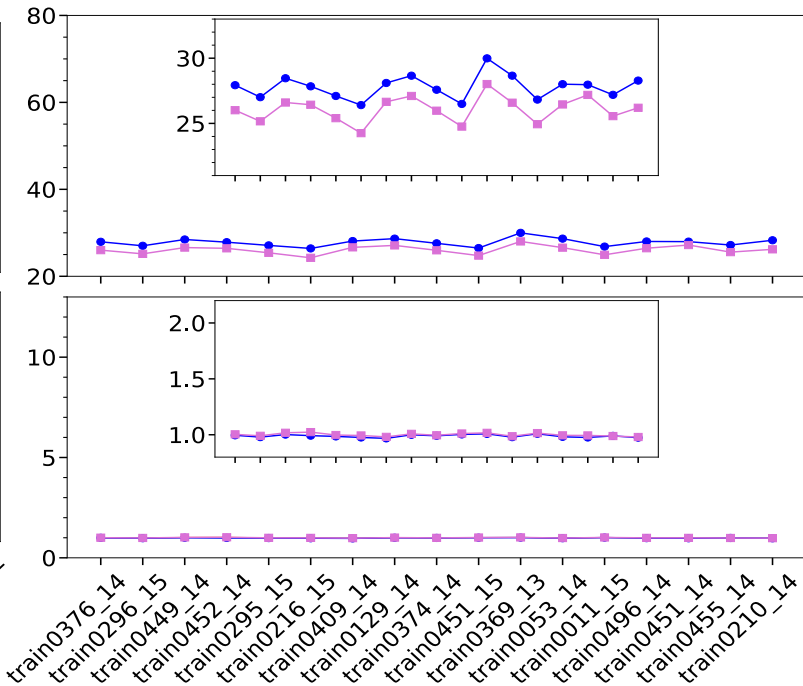

(c)  $\Delta E = 2.0$  eV/atom

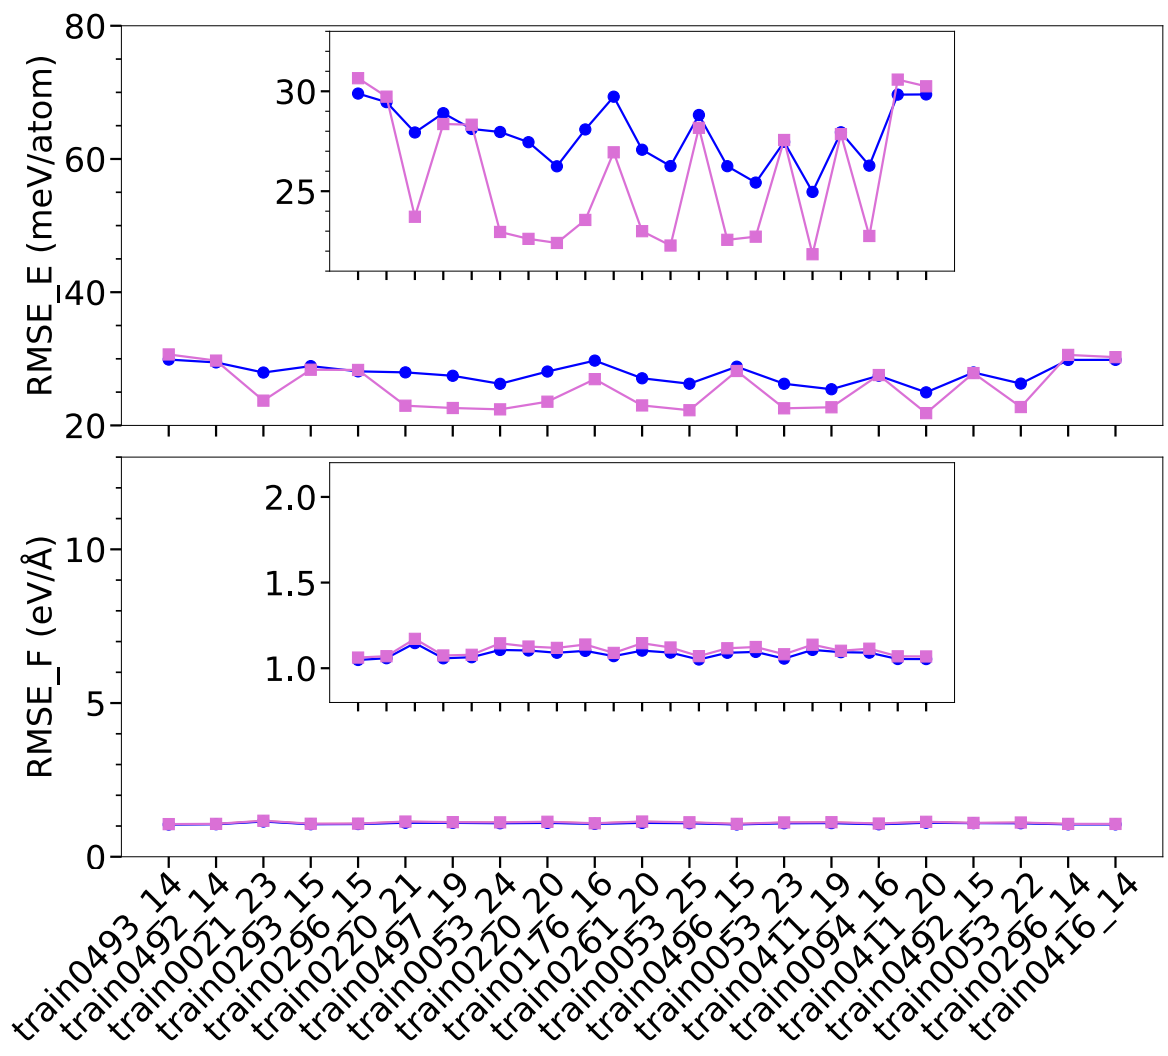

Supplement: d4cp02300e1.zip [file d4cp02300e1.zip]

49

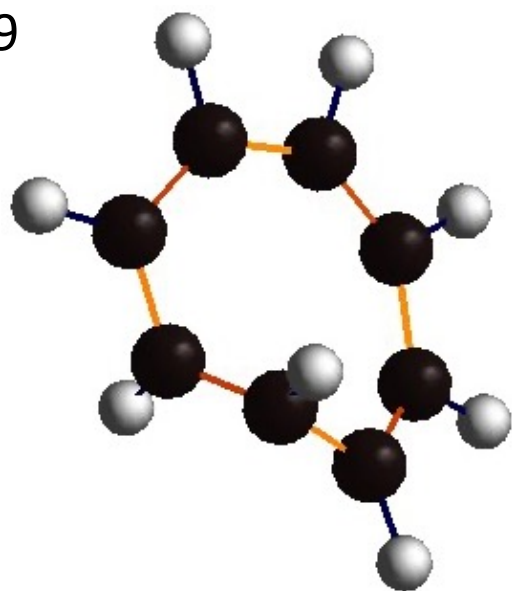

50

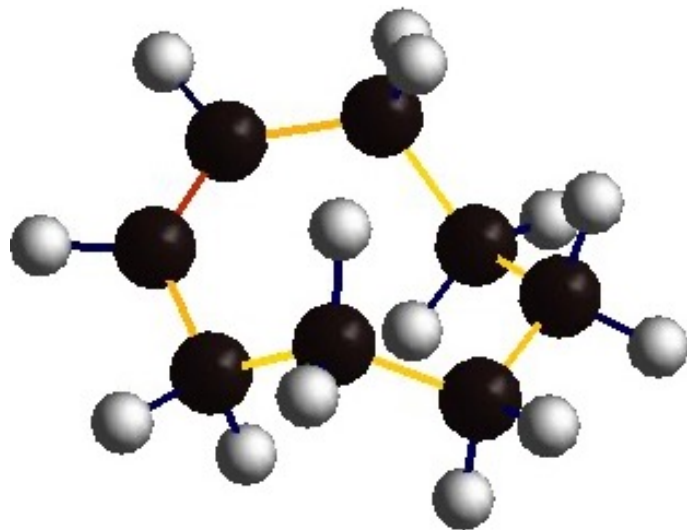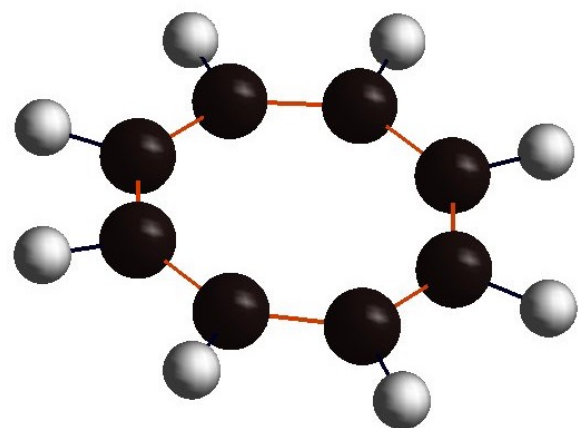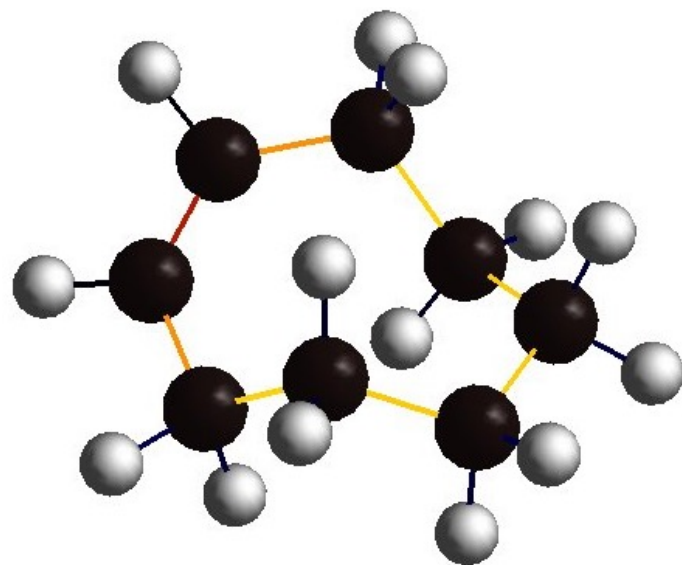

51

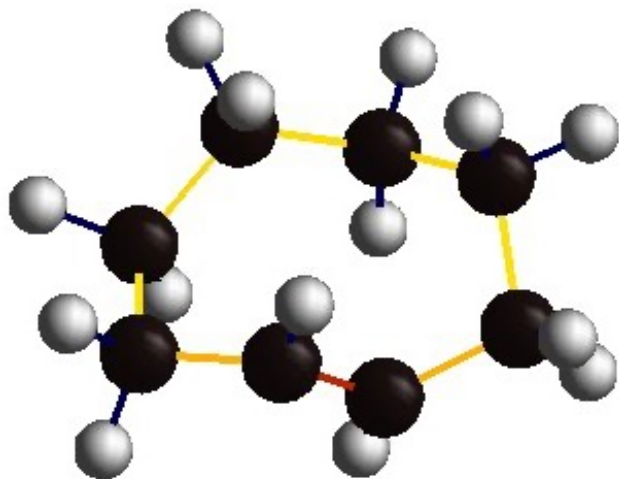

52

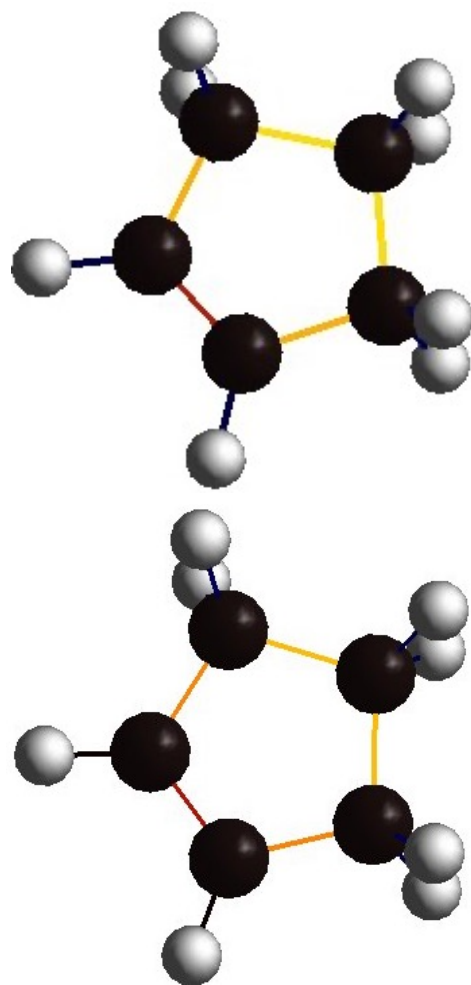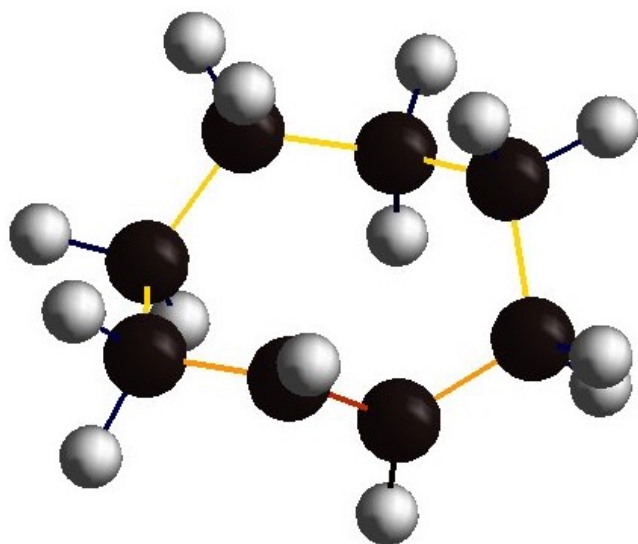

Supplement: d4cp02300e1.zip [file d4cp02300e1.zip]

33

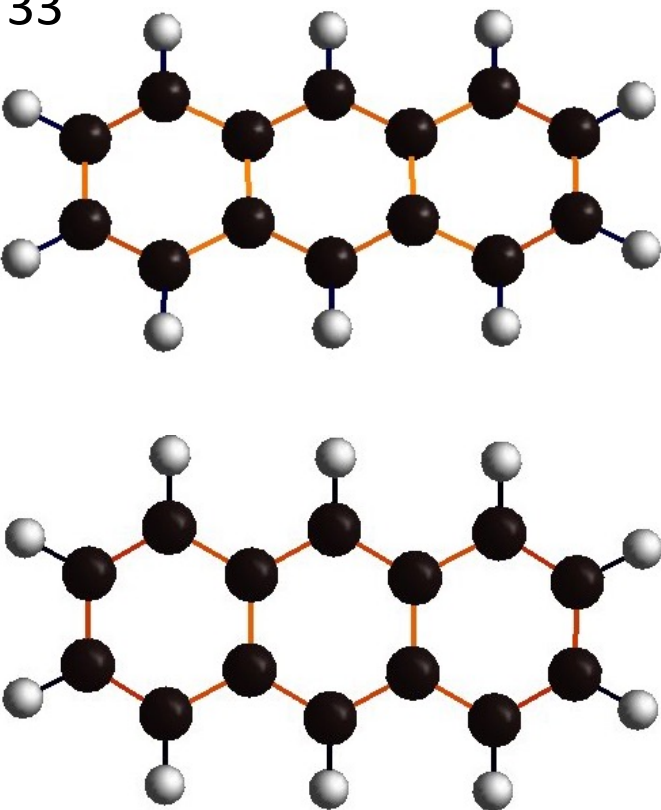

34

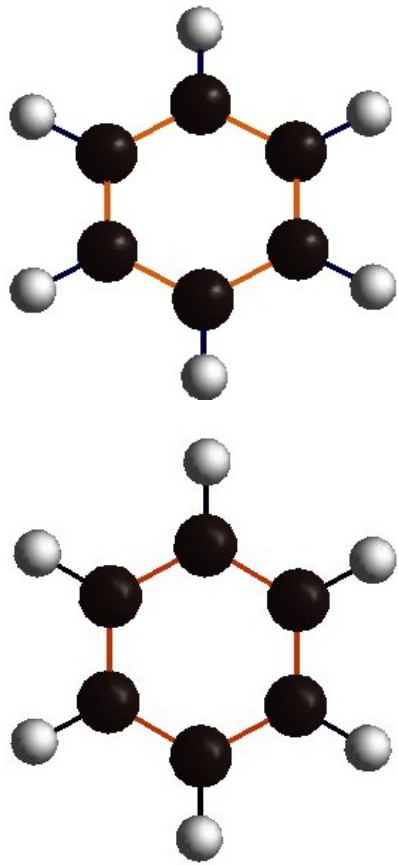

35

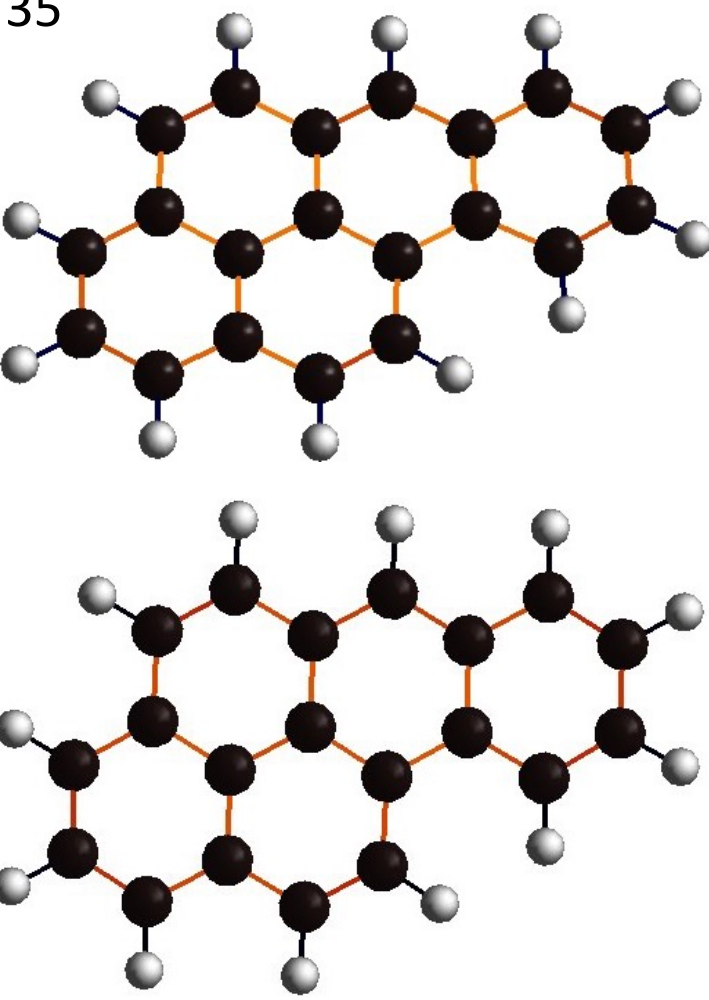

36

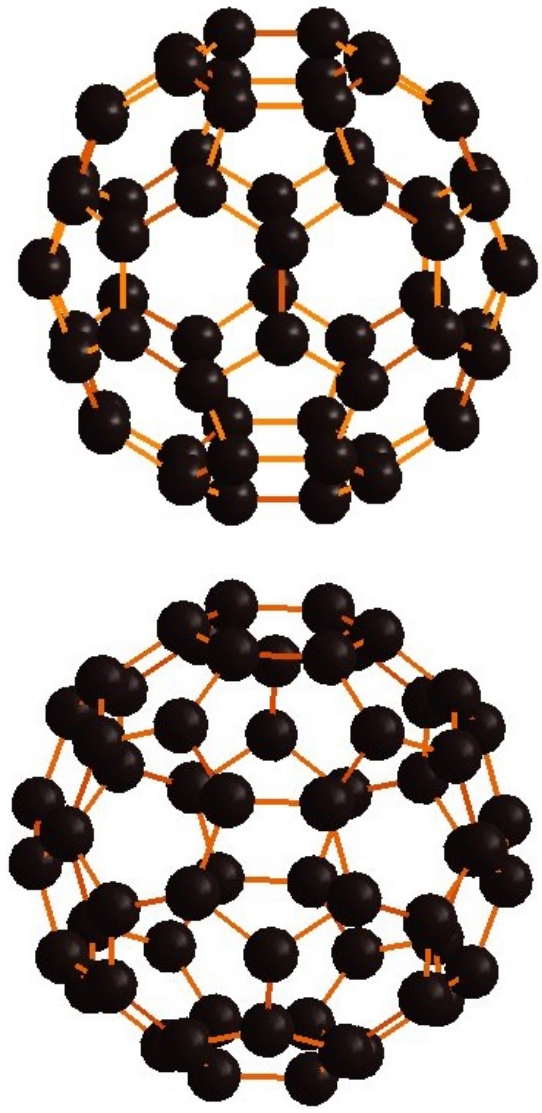

Supplement: d4cp02300e1.zip [file d4cp02300e1.zip]

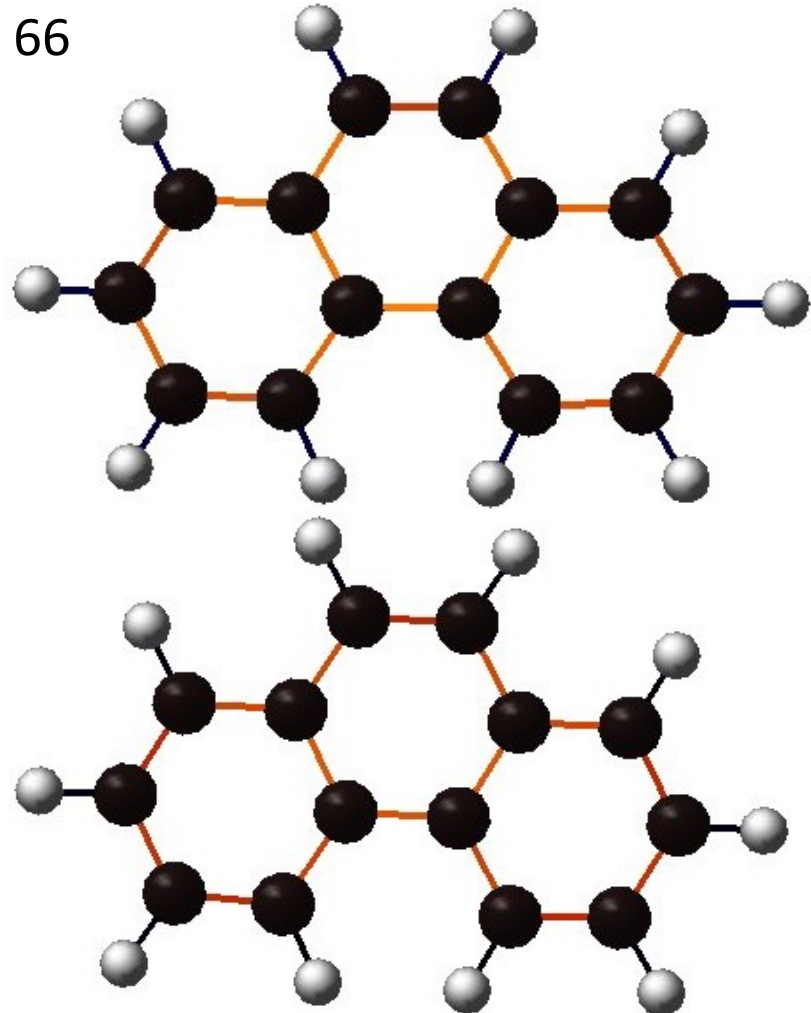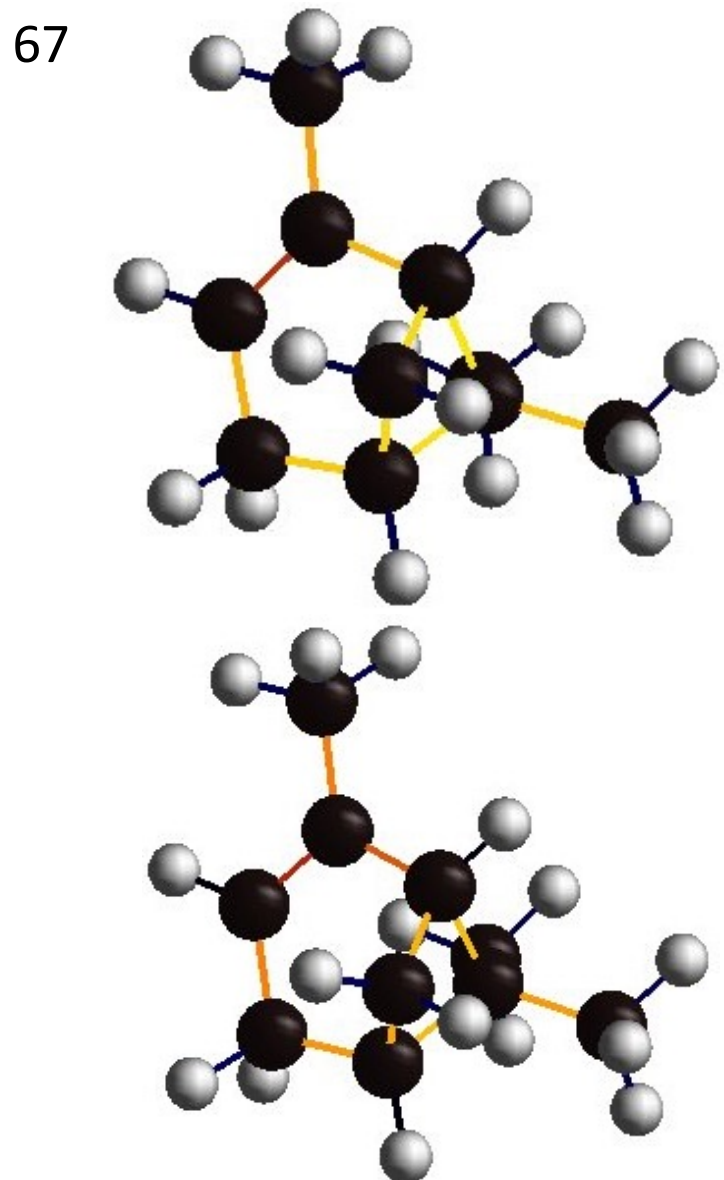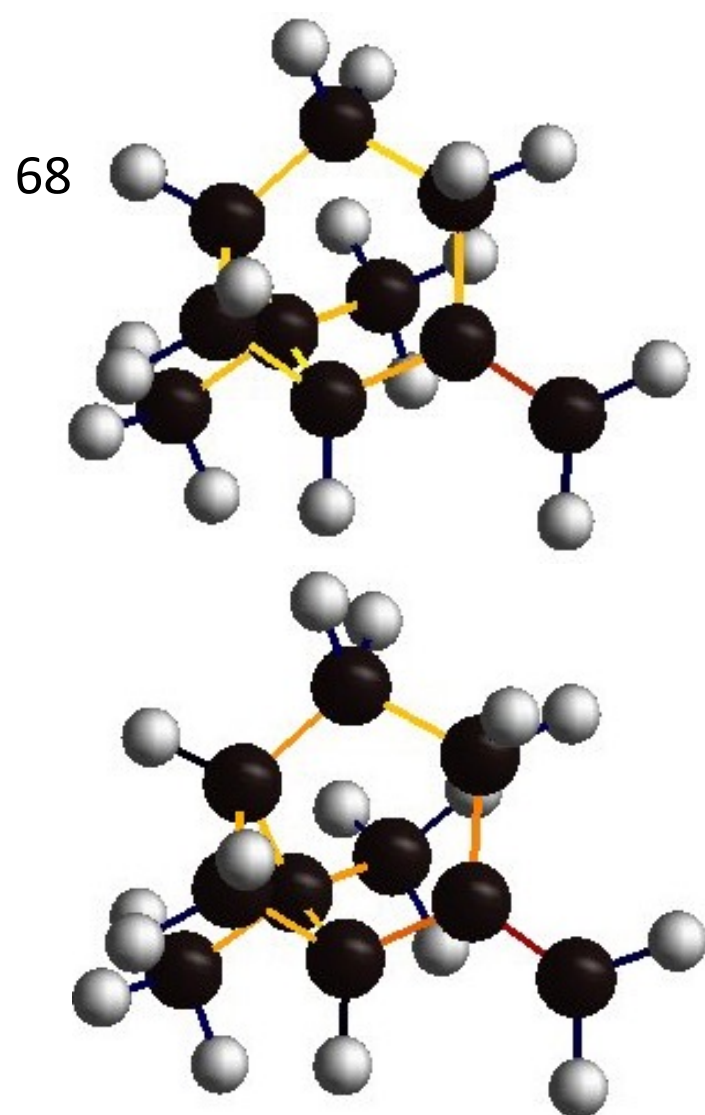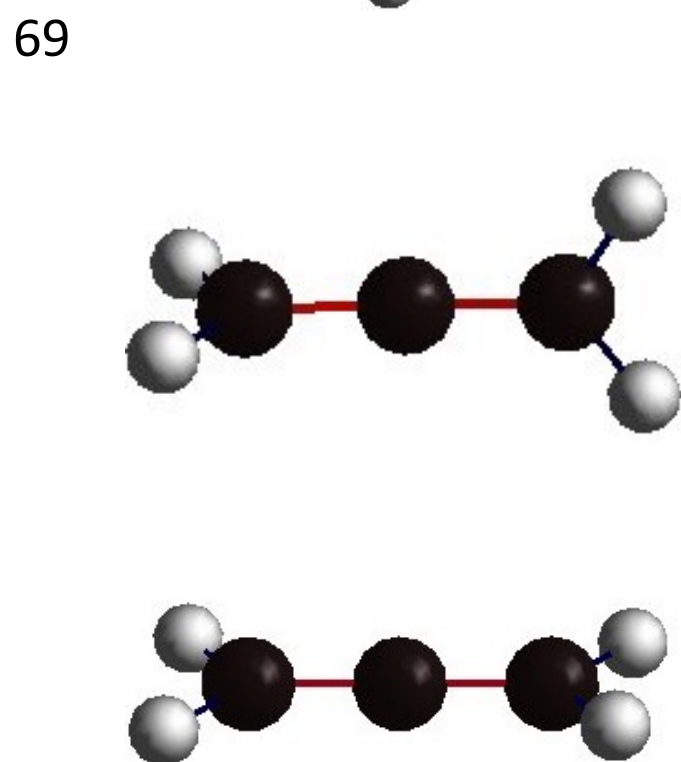

Supplement: d4cp02300e1.zip [file d4cp02300e1.zip]

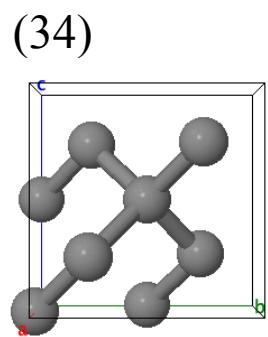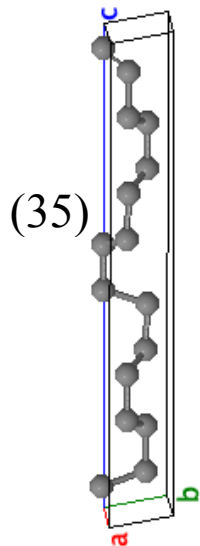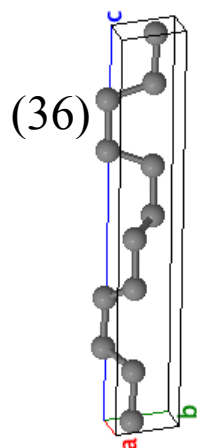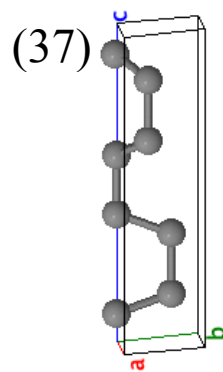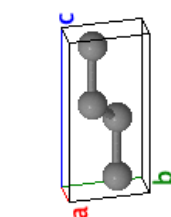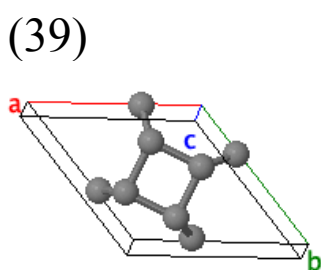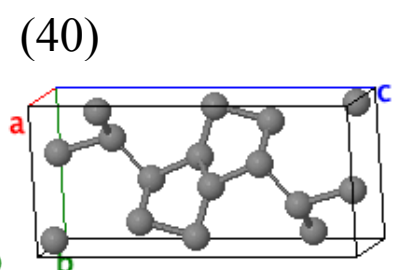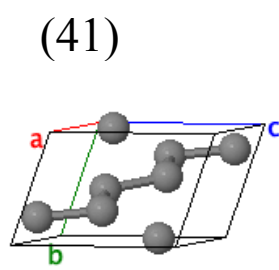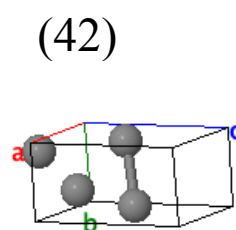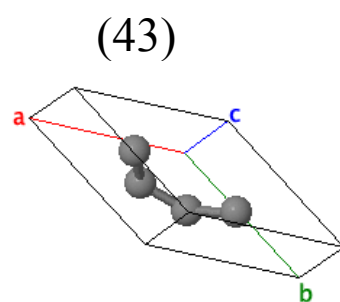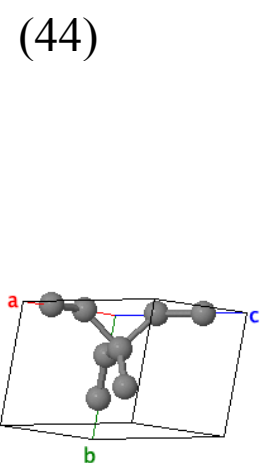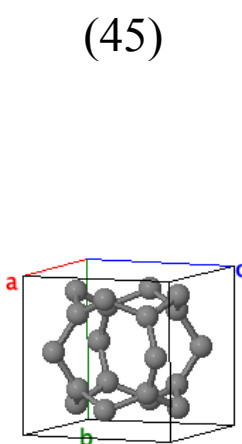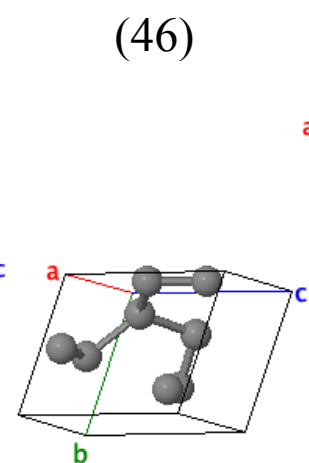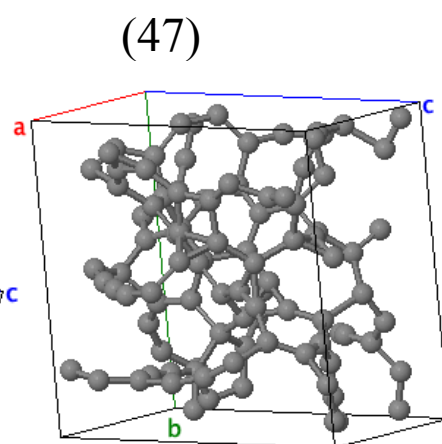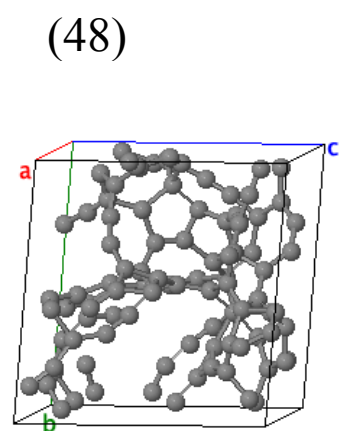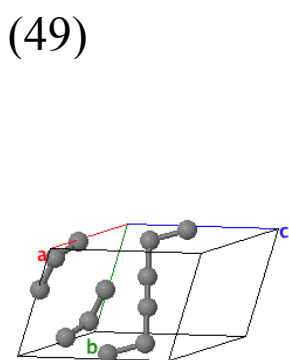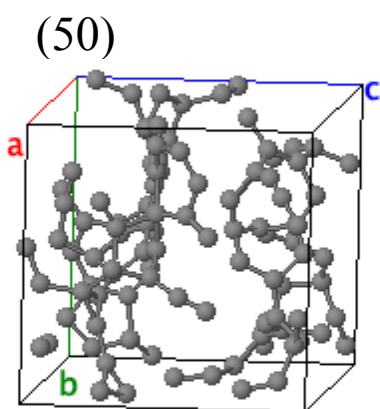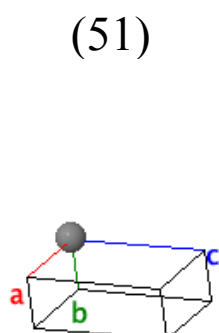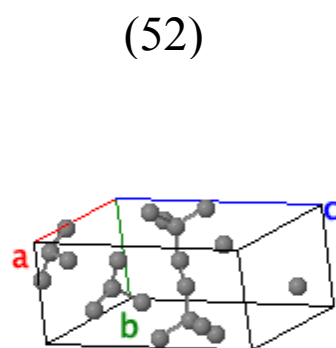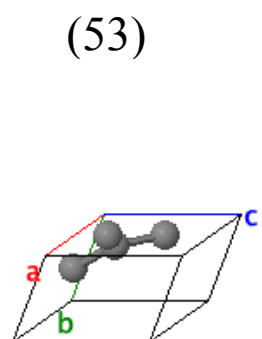

Supplement: d4cp02300e1.zip [file d4cp02300e1.zip]

(18)

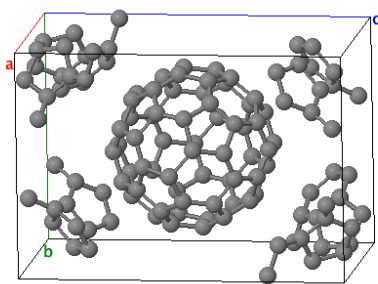

(19)

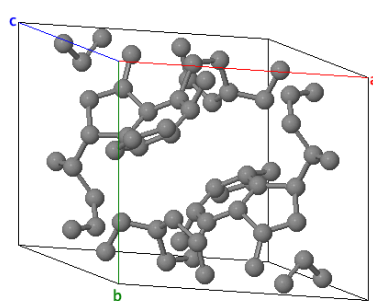

(20)

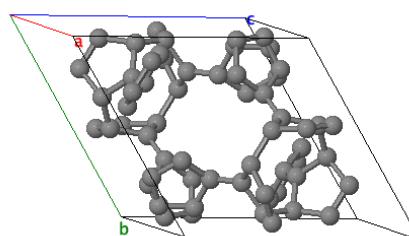

(21)

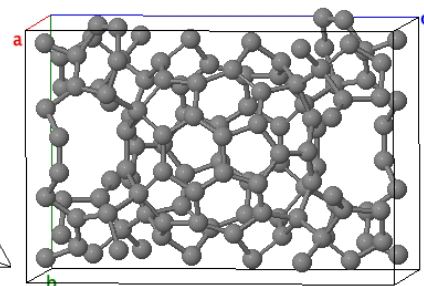

(22)

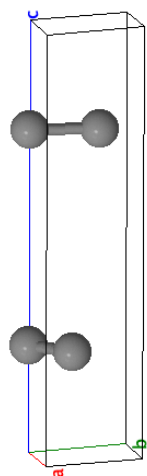

(23)

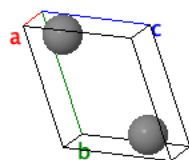

(24)

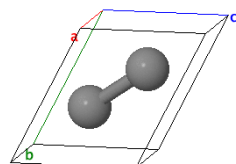

(25)

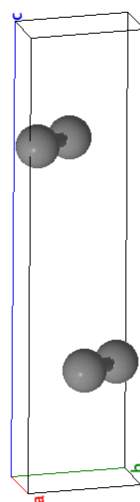

(26)

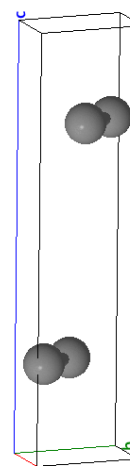

(27)

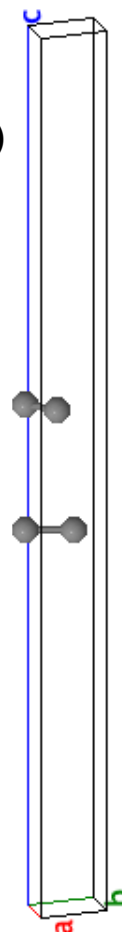

(28)

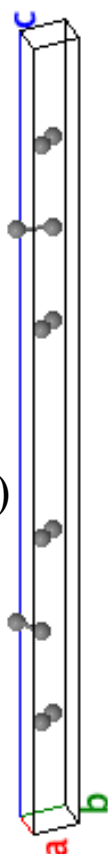

(29)

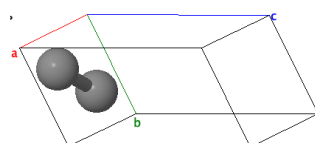

(30)

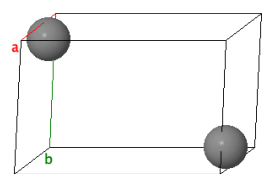

(31)

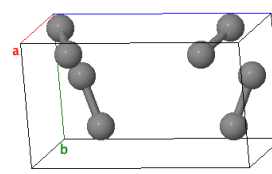

(32)

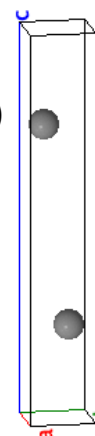

(33)

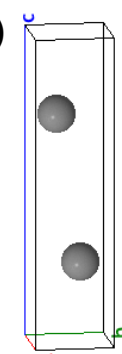

Supplement: d4cp02300e1.zip [file d4cp02300e1.zip]

60

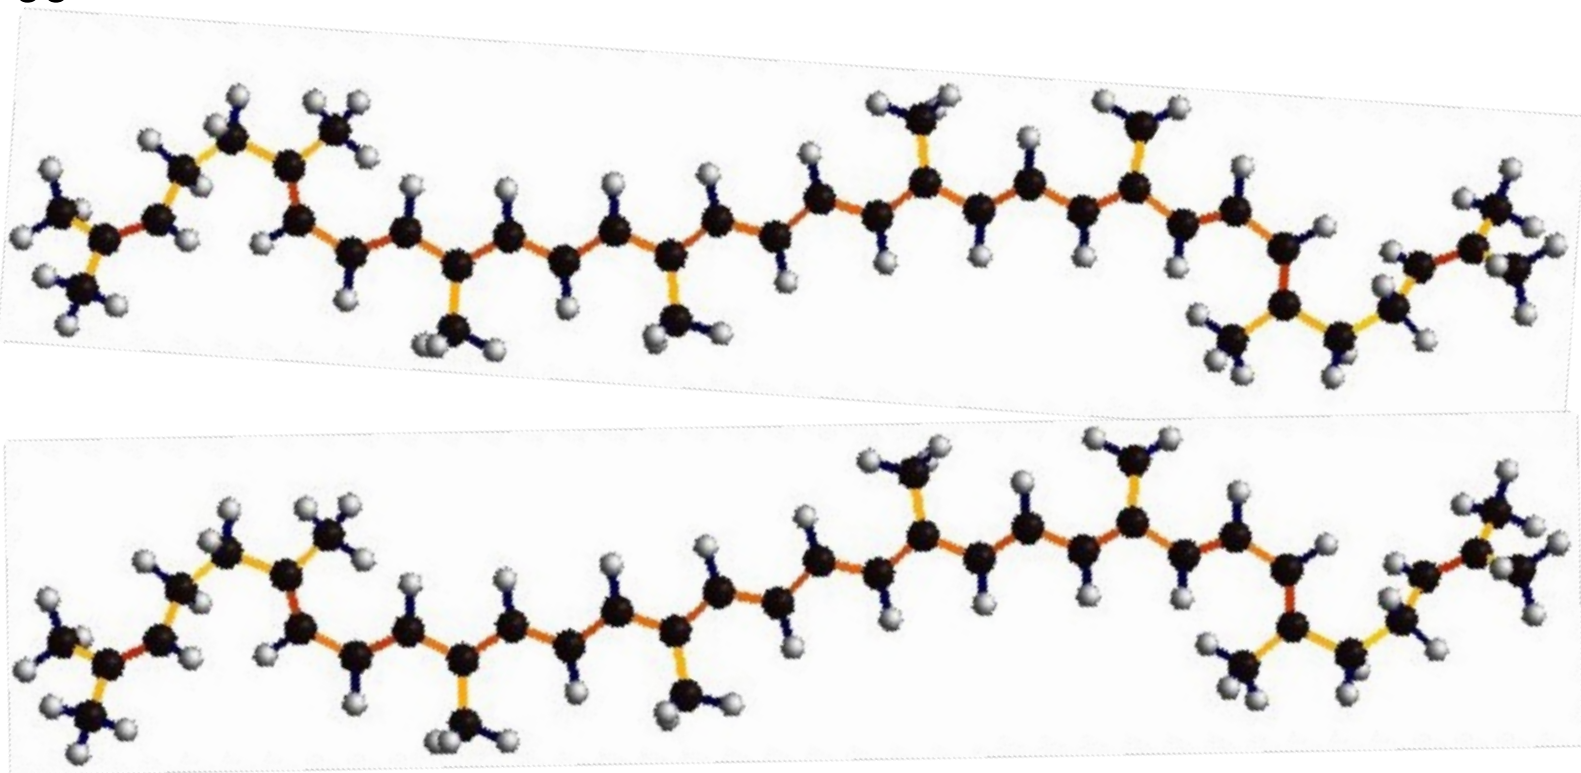

61

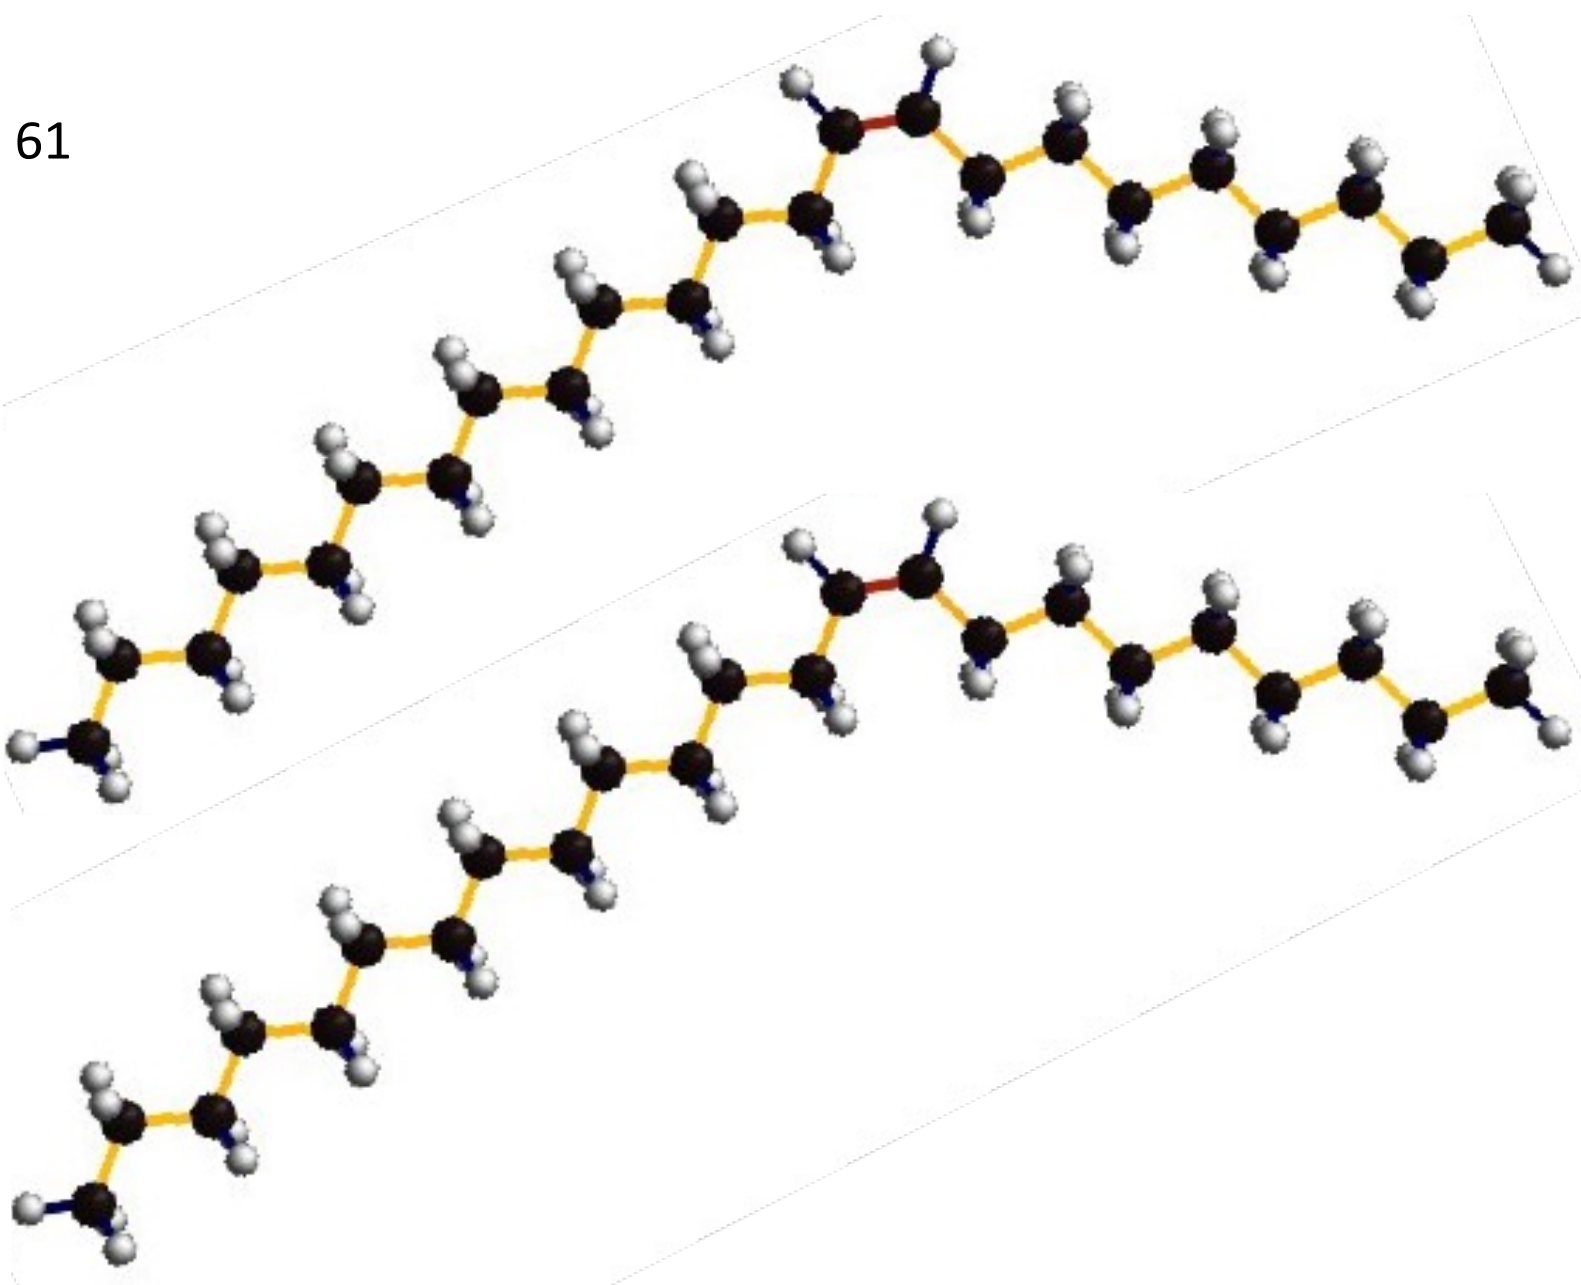

Supplement: d4cp02300e1.zip [file d4cp02300e1.zip]

01

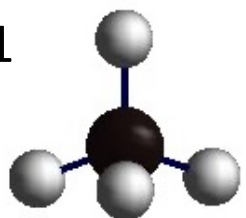

02

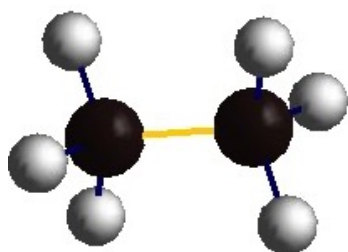

03

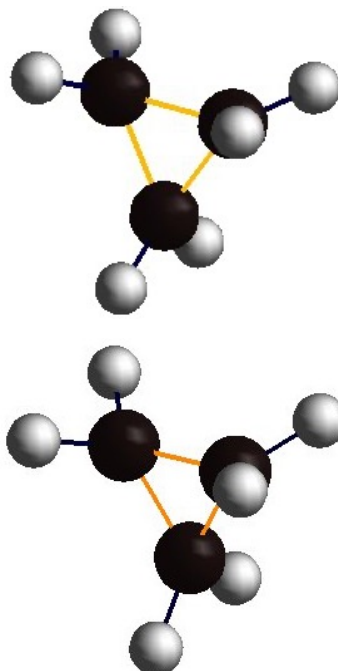

04

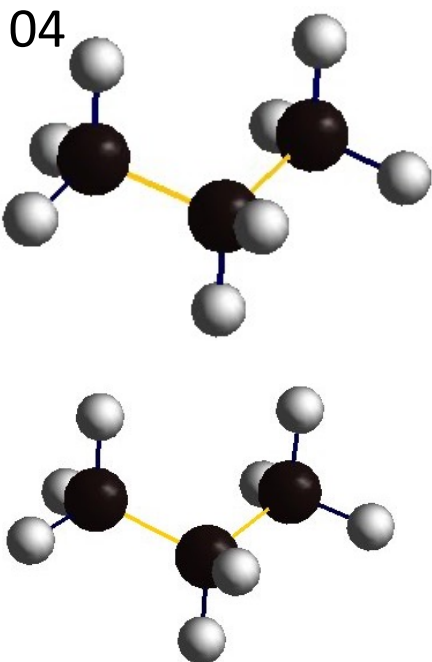

05

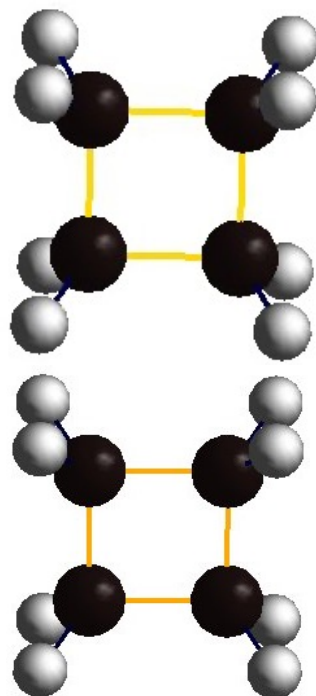

06

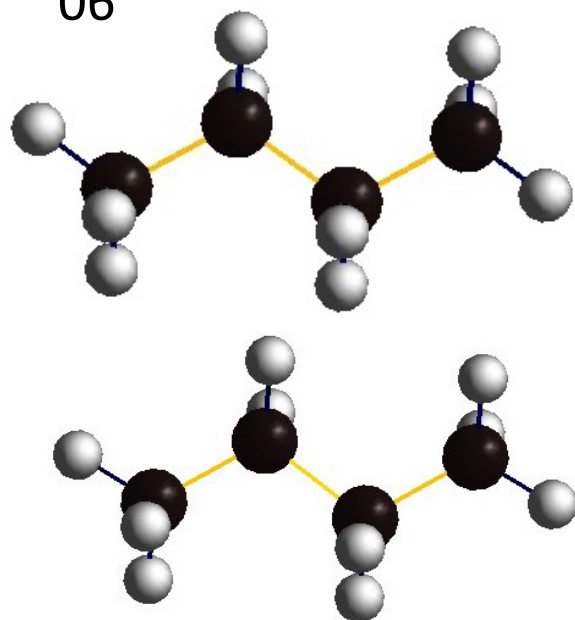

07

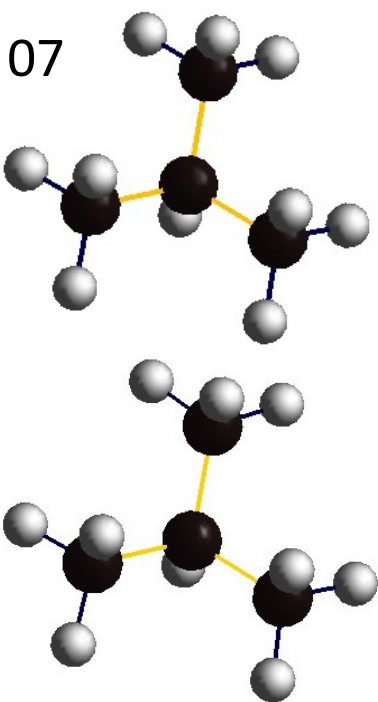

08

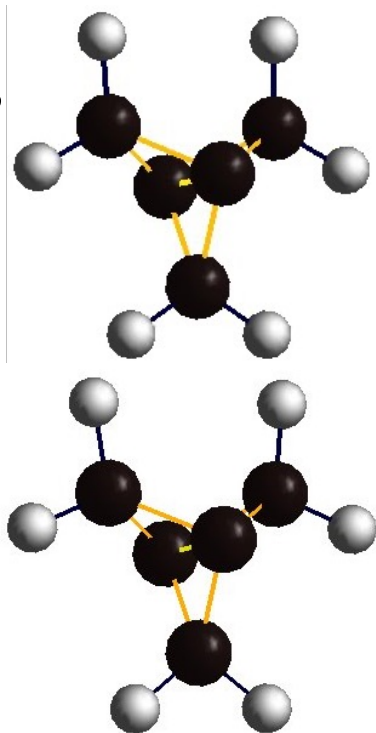

09

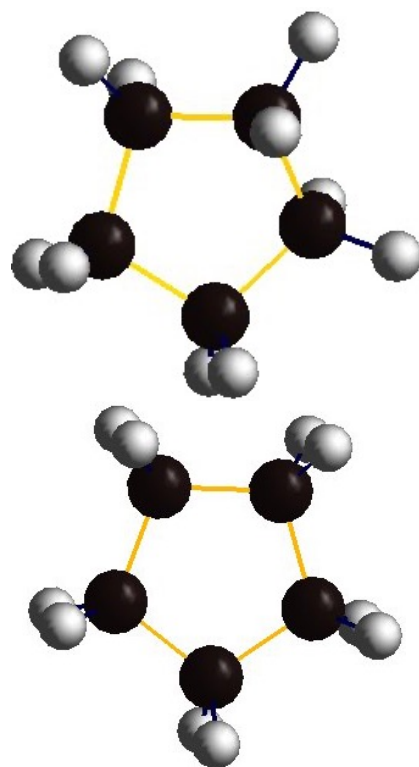

Supplement: d4cp02300e1.zip [file d4cp02300e1.zip]

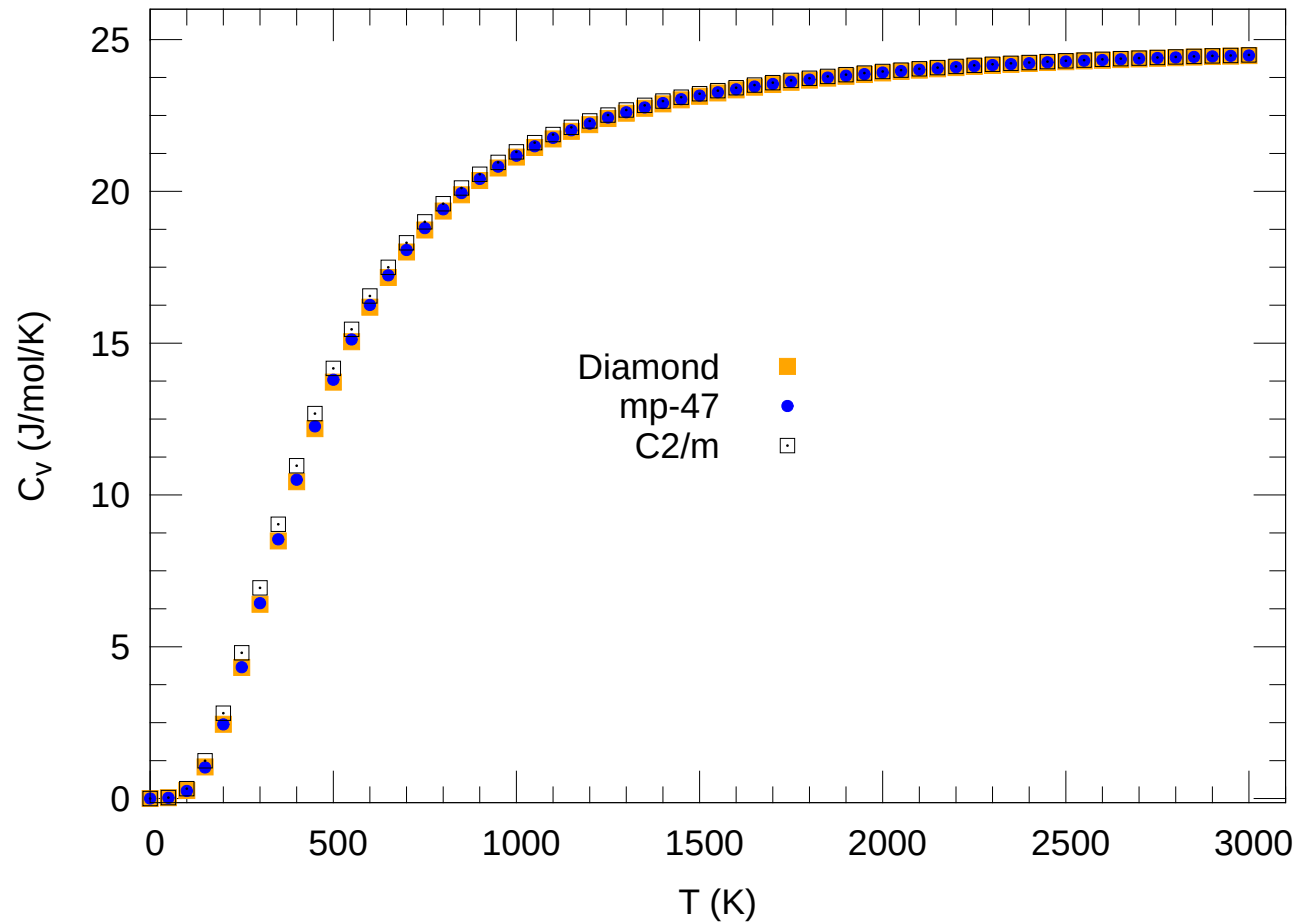

Supplement: d4cp02300e1.zip [file d4cp02300e1.zip]

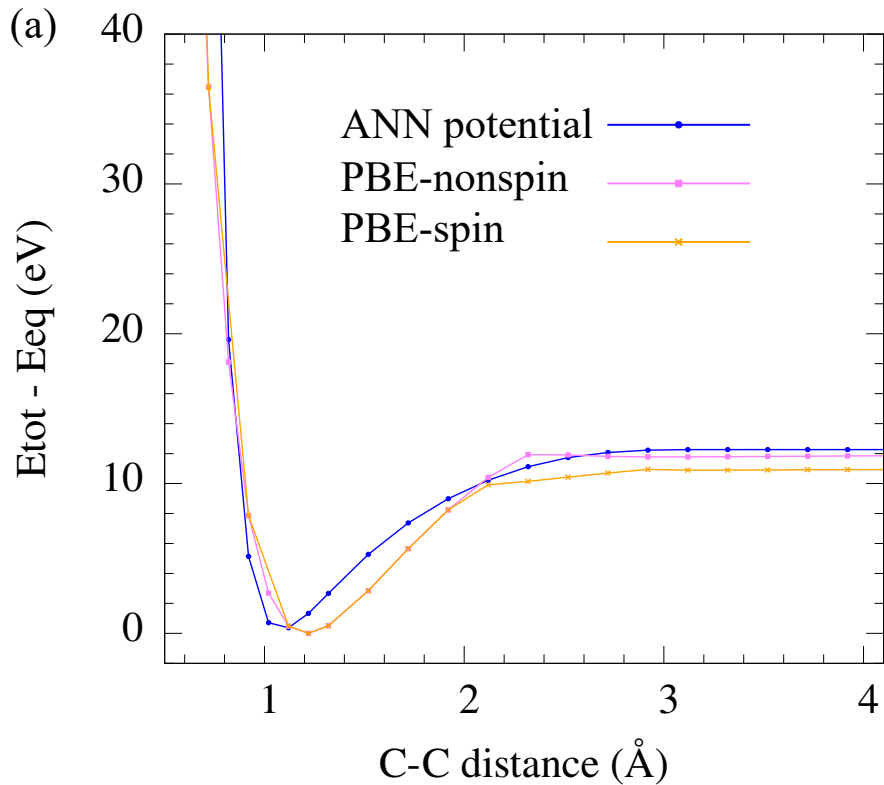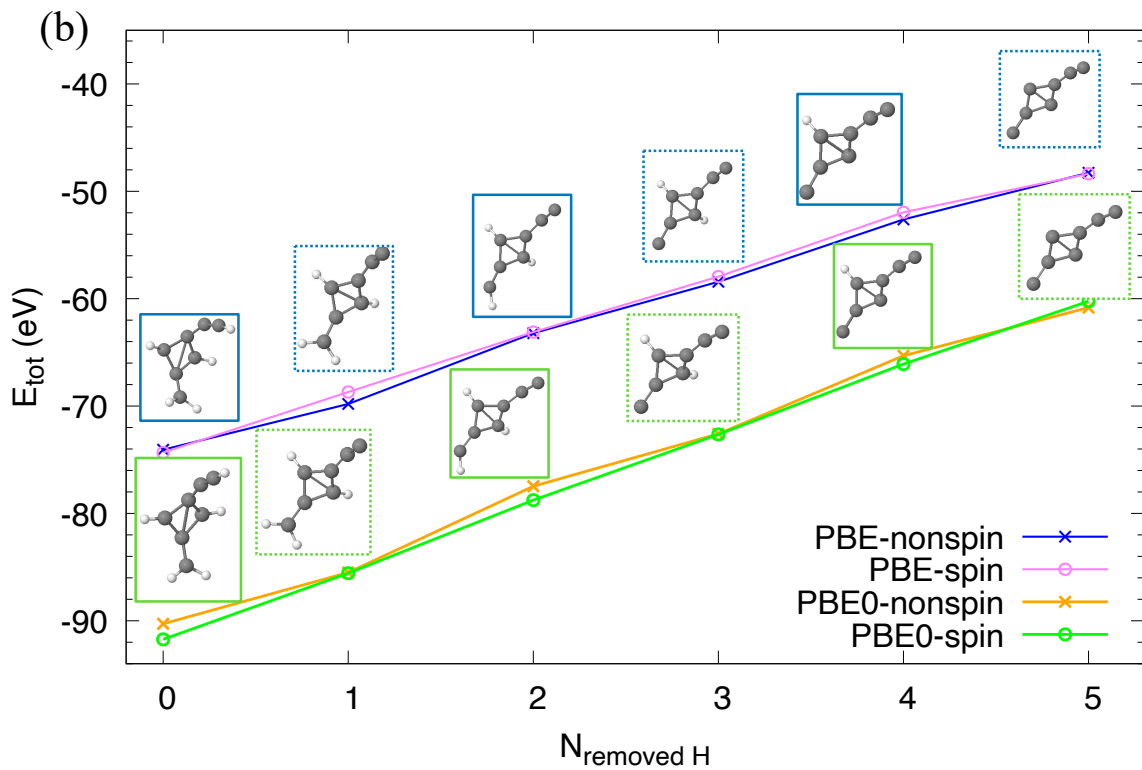

Supplement: d4cp02300e1.zip [file d4cp02300e1.zip]

82

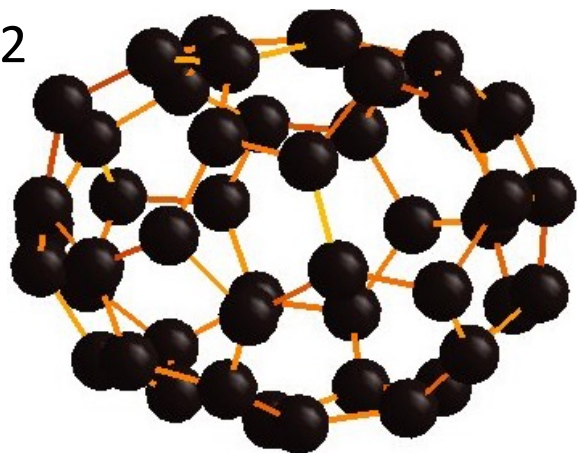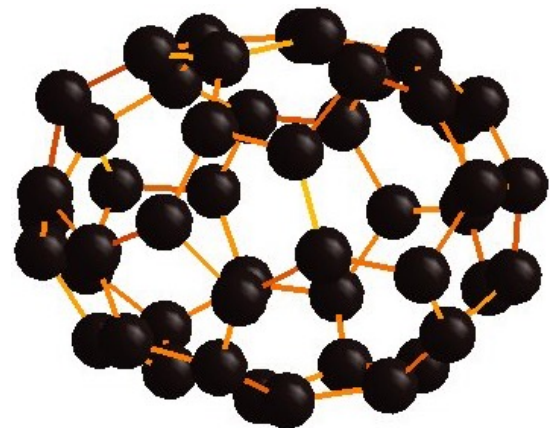

84

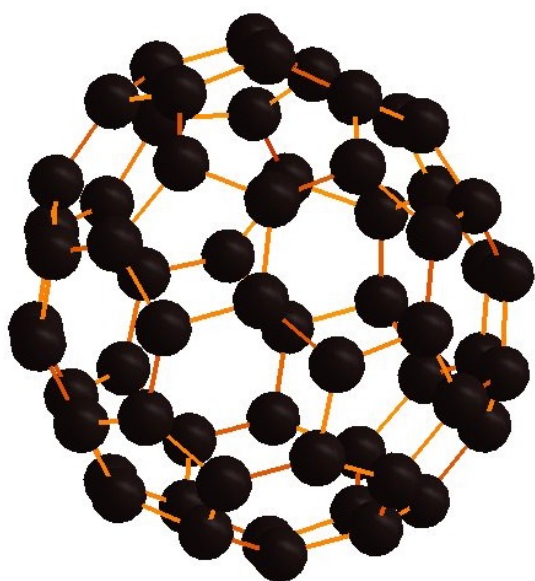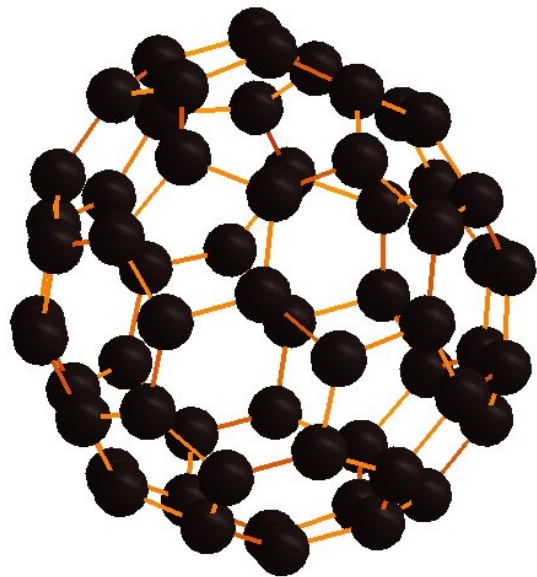

83

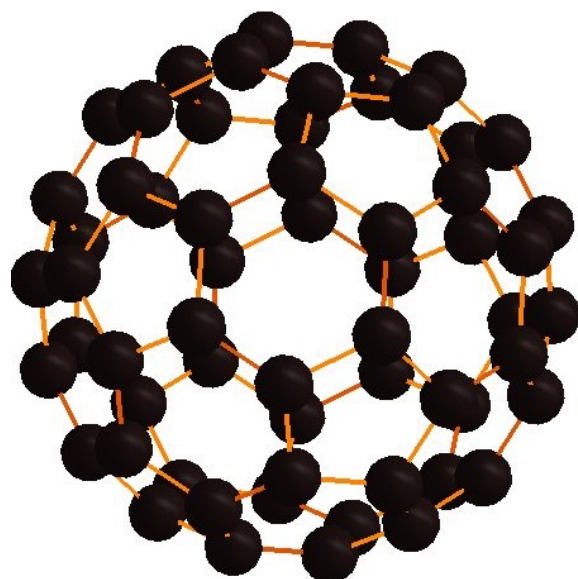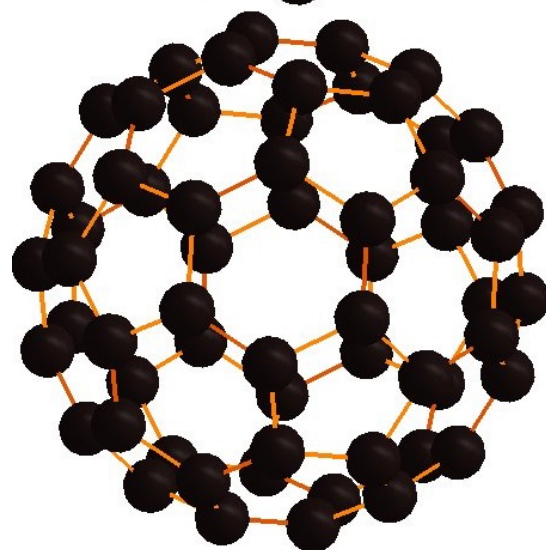

85

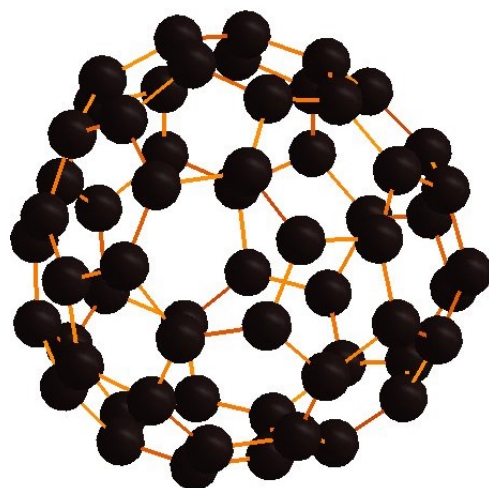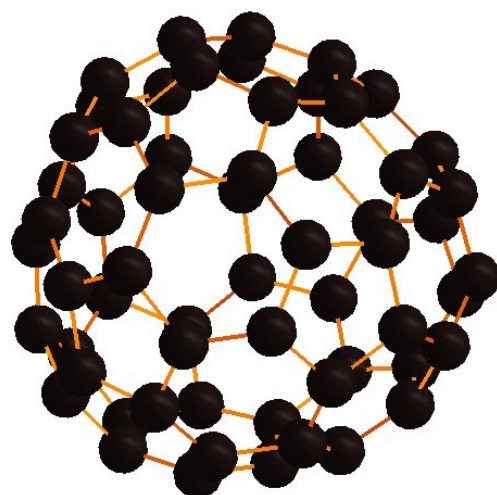

Supplement: d4cp02300e1.zip [file d4cp02300e1.zip]

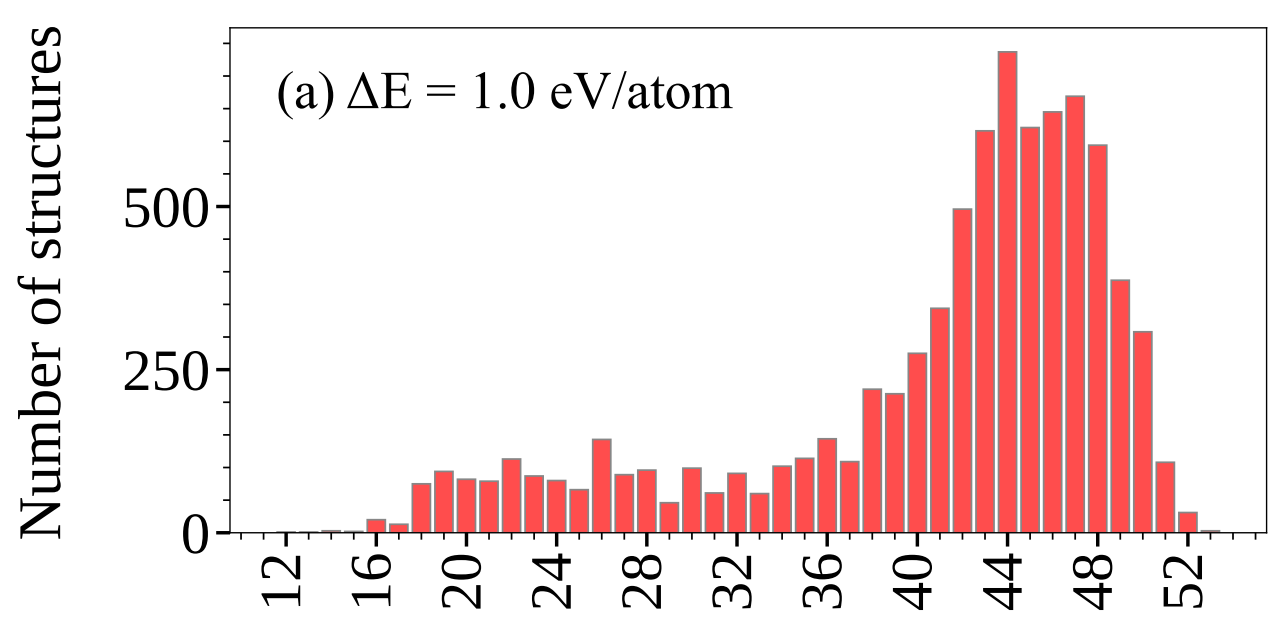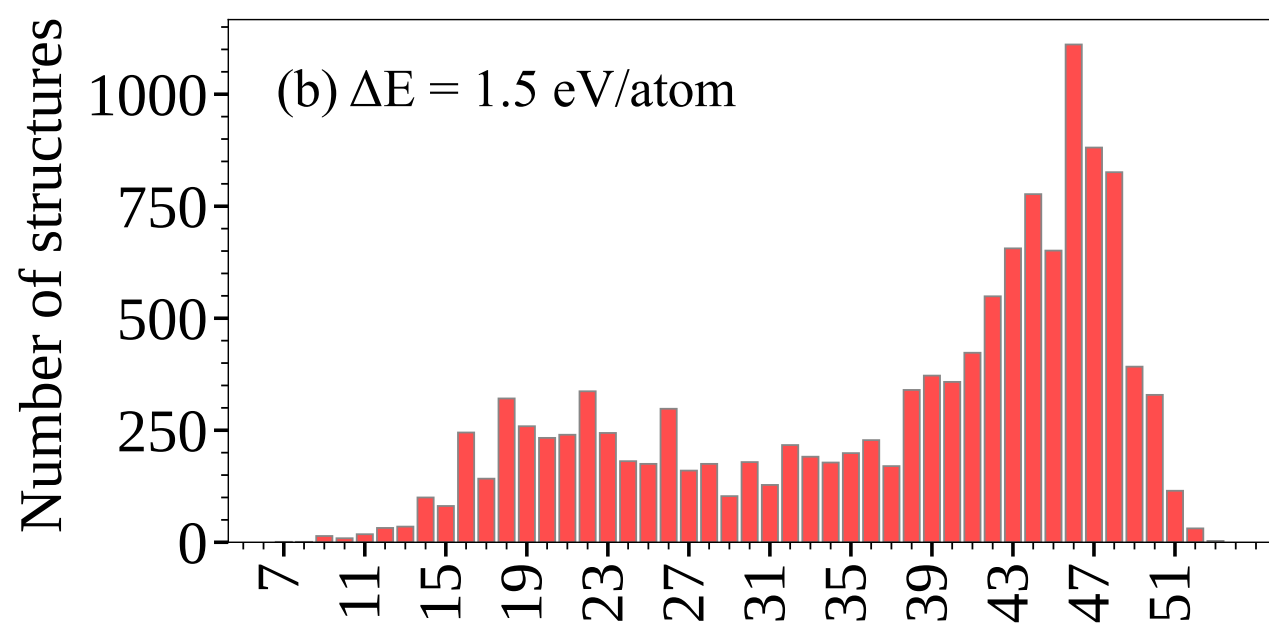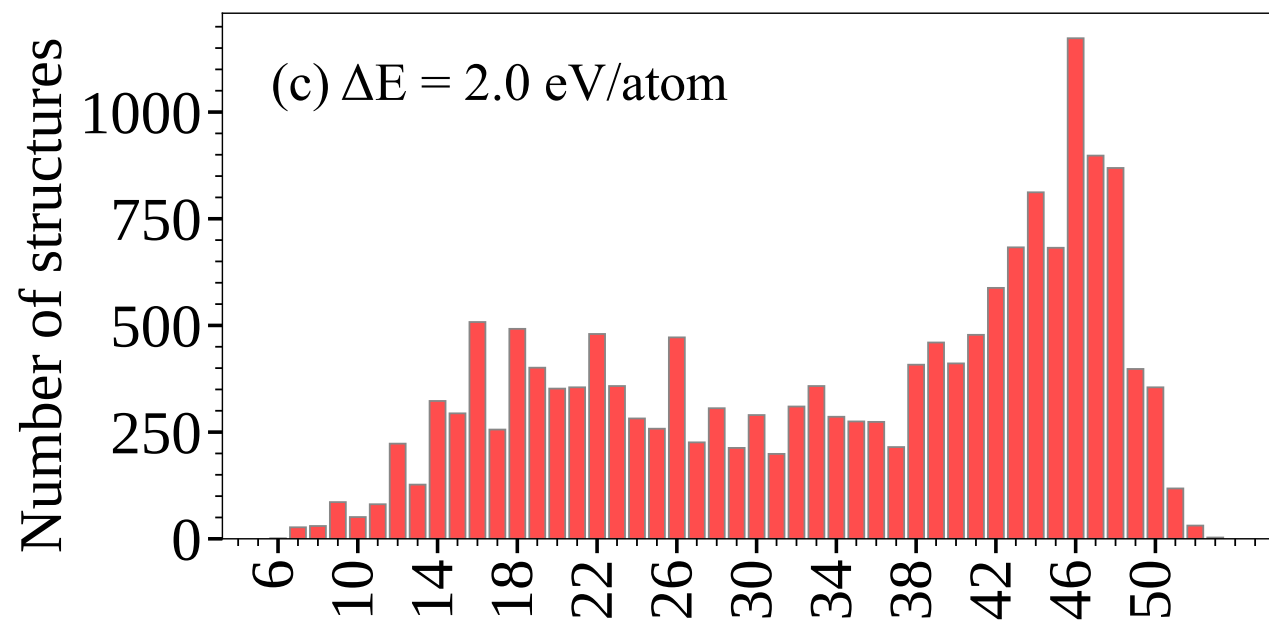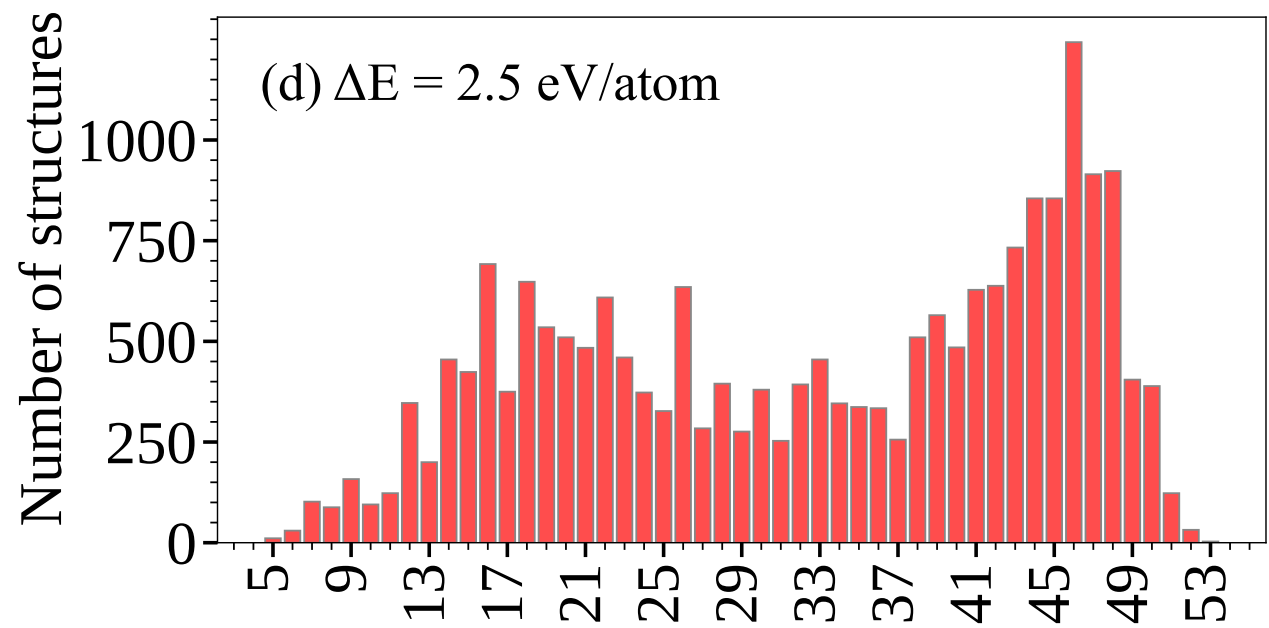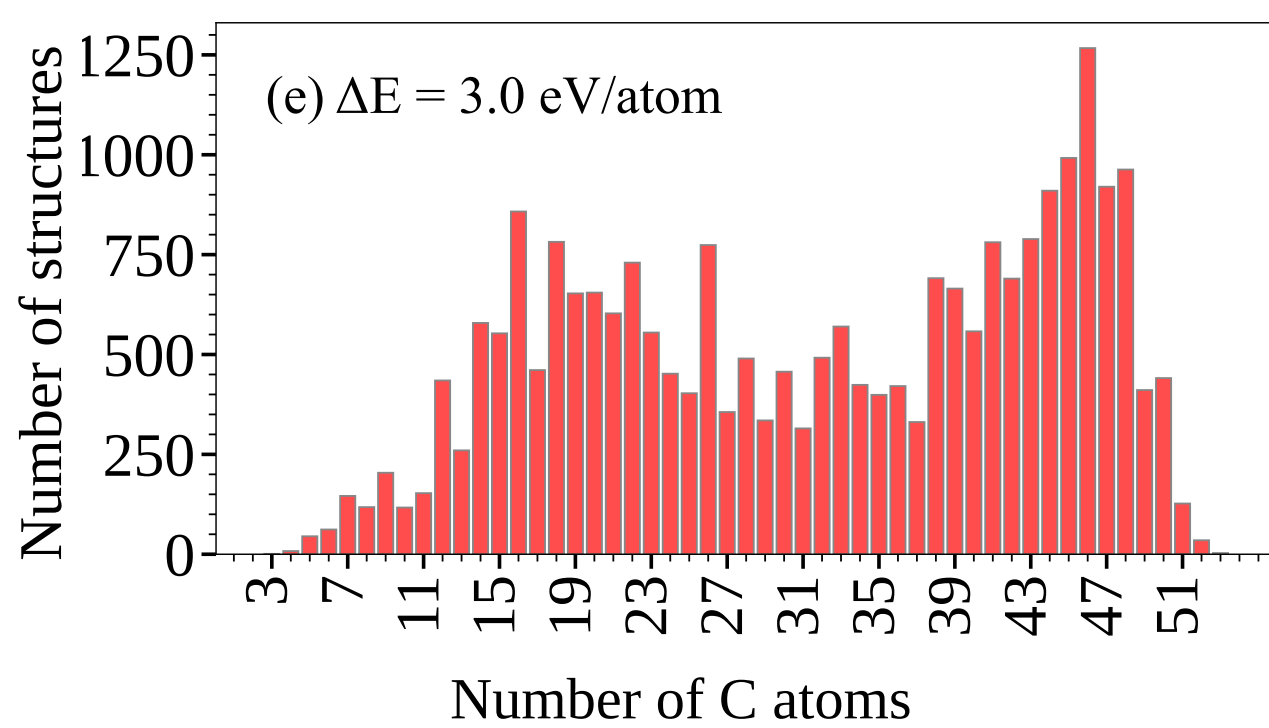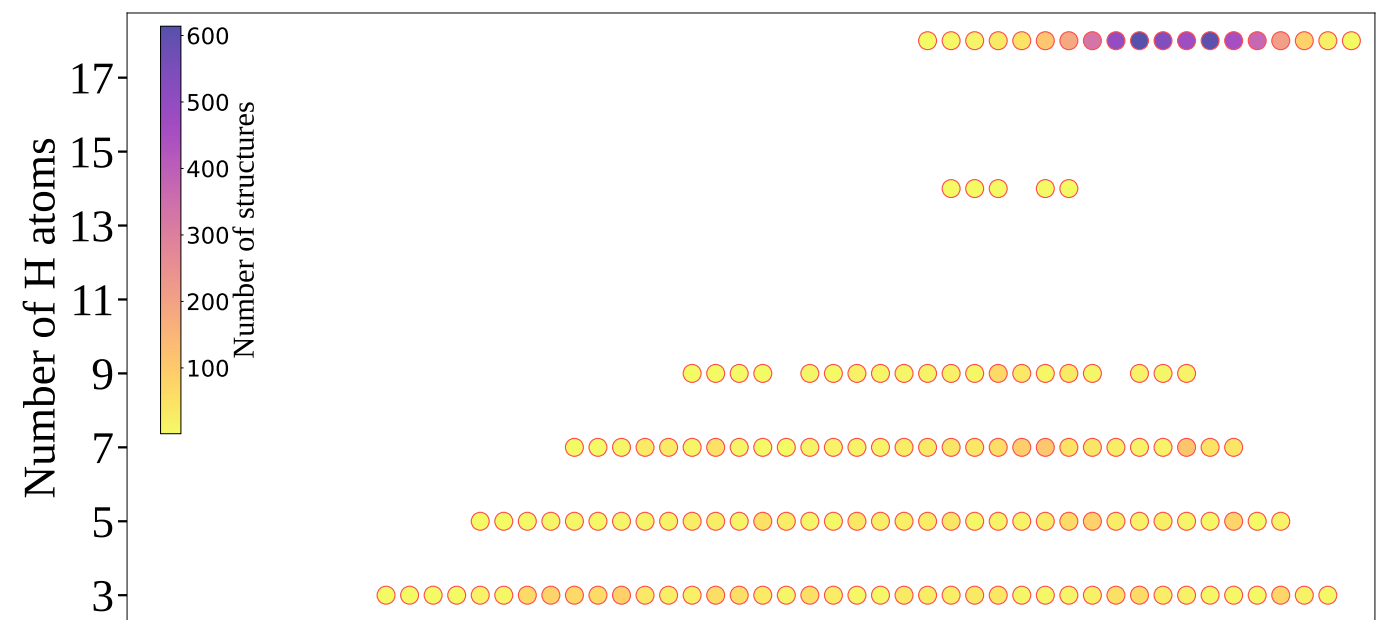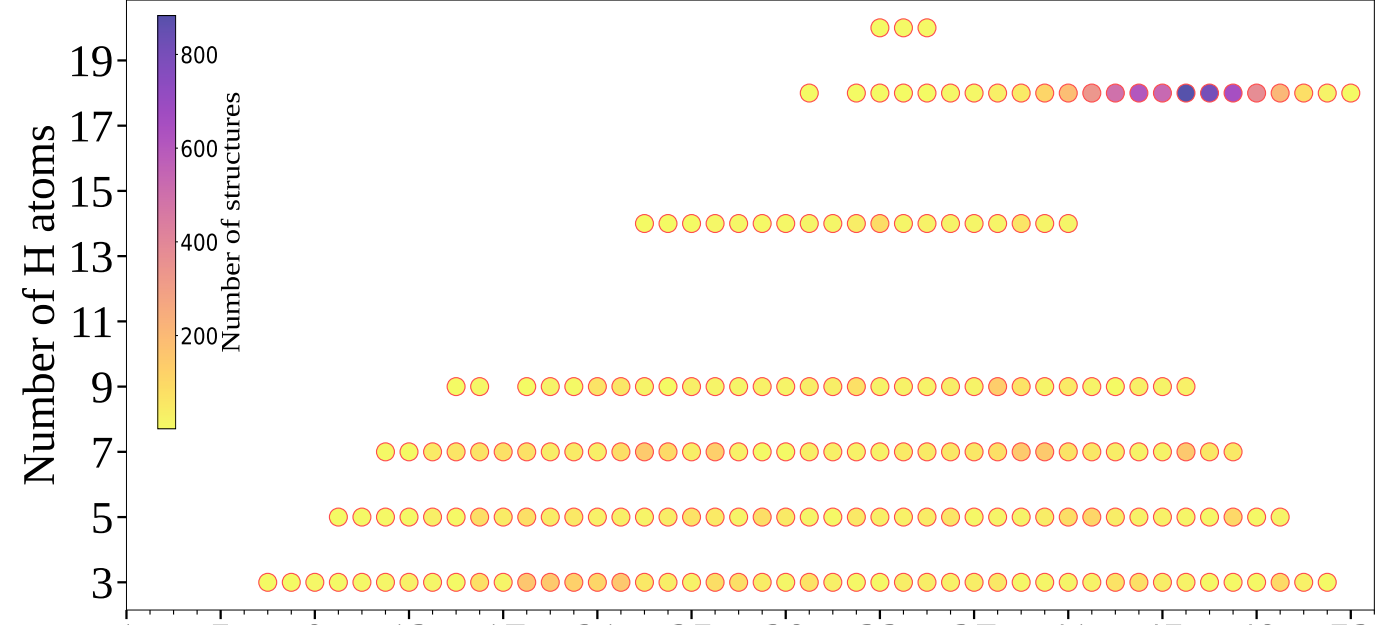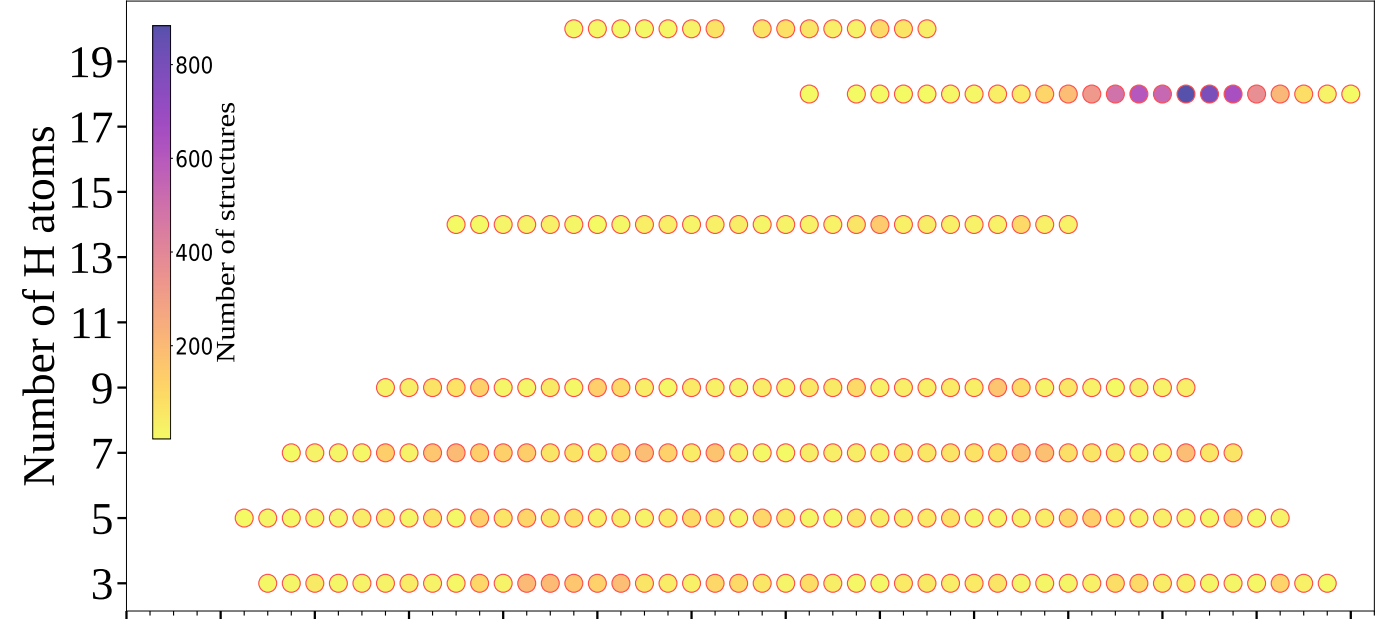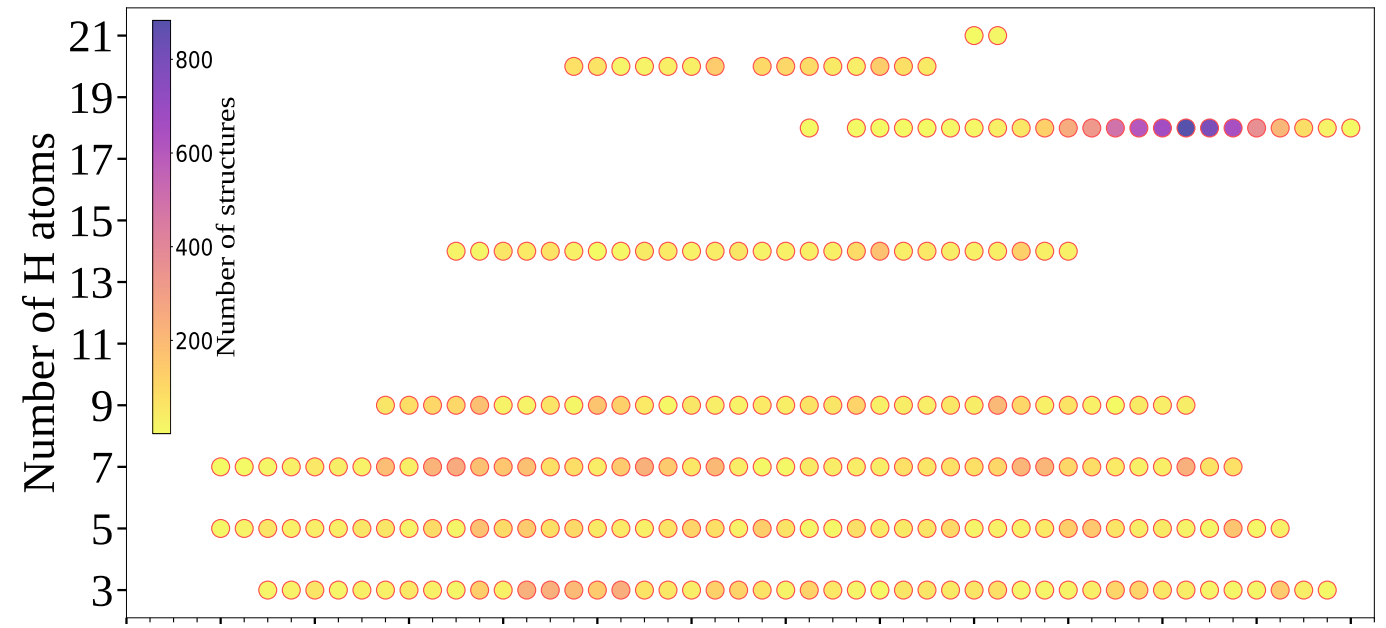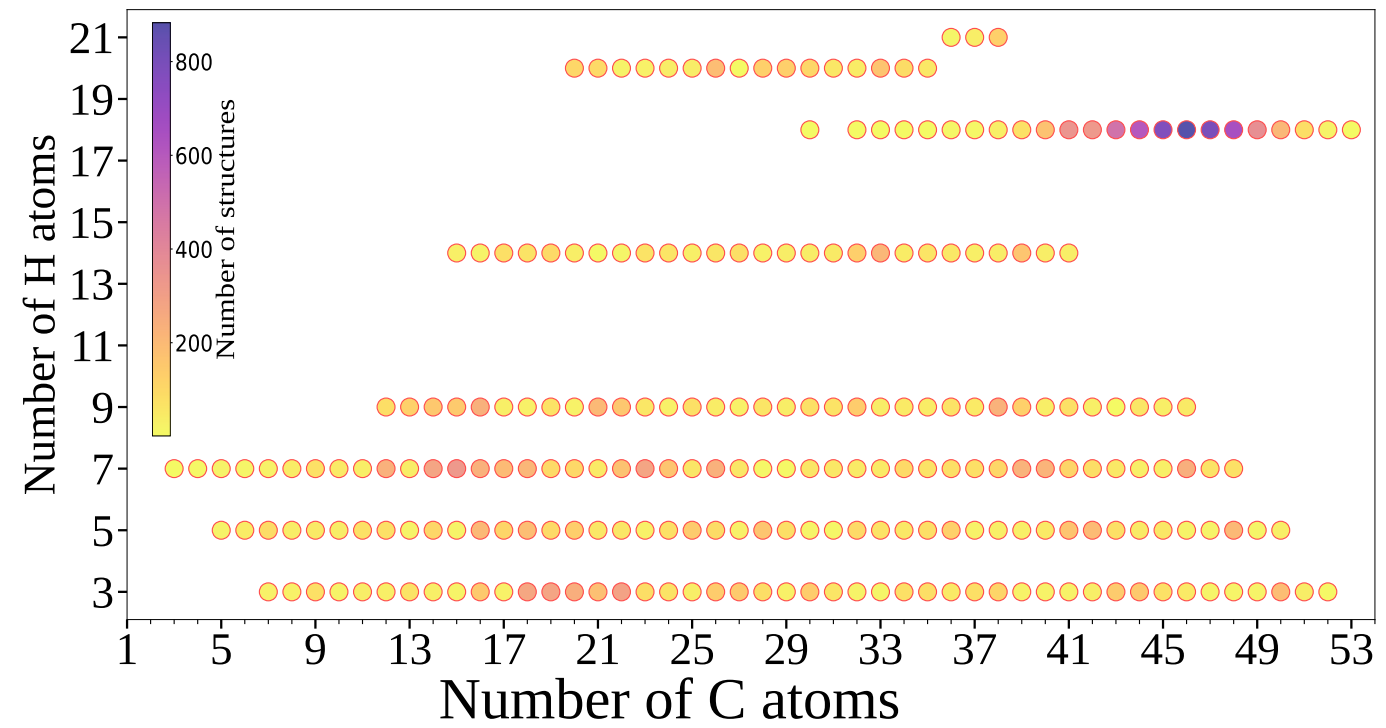

Supplement: d4cp02300e1.zip [file d4cp02300e1.zip]

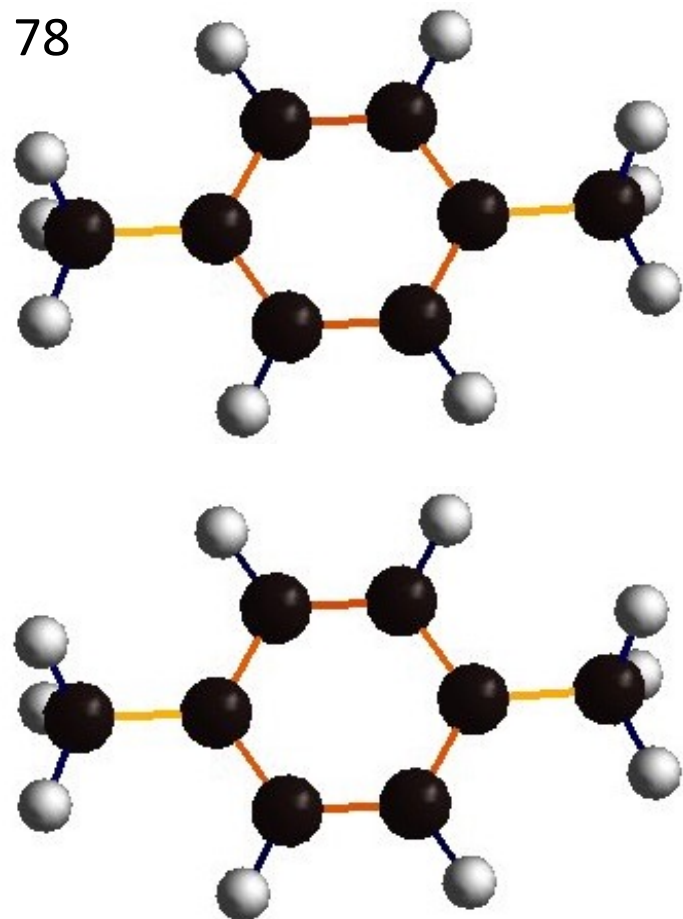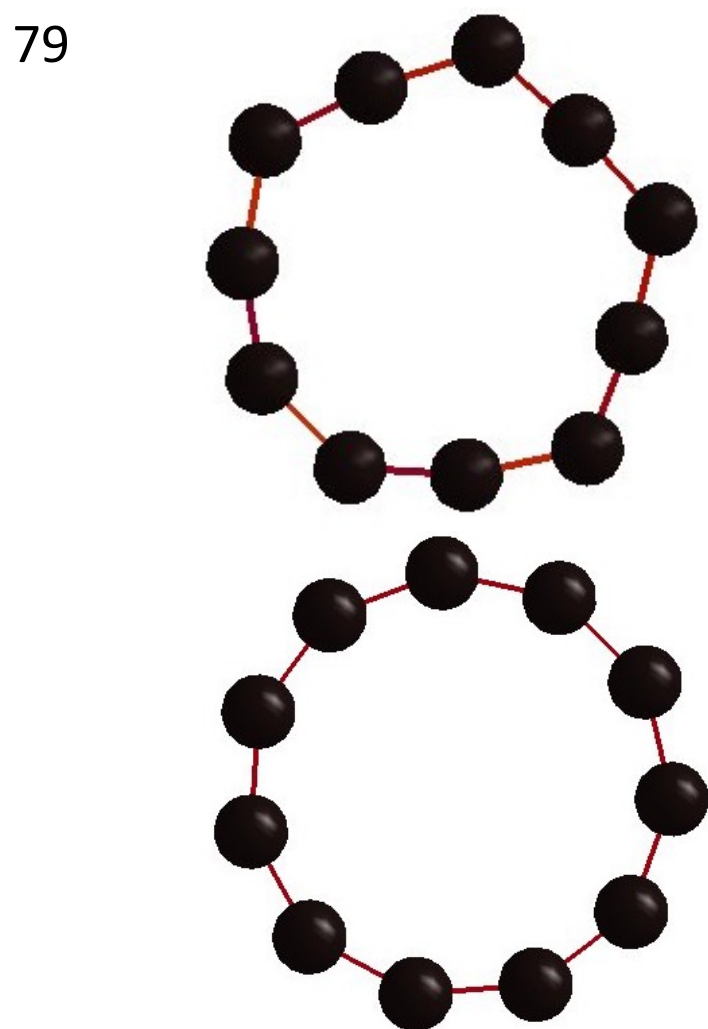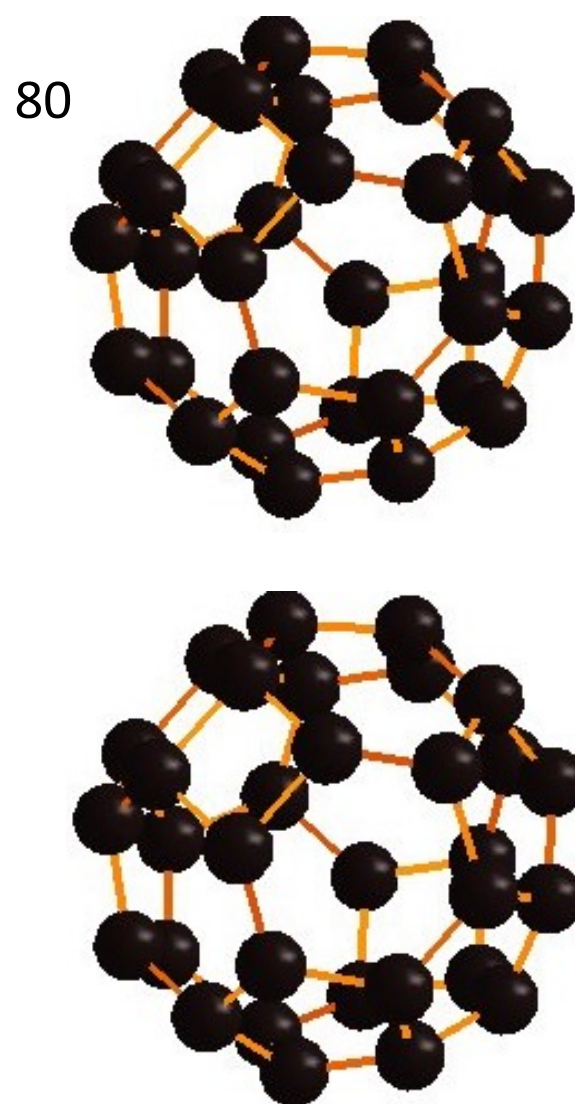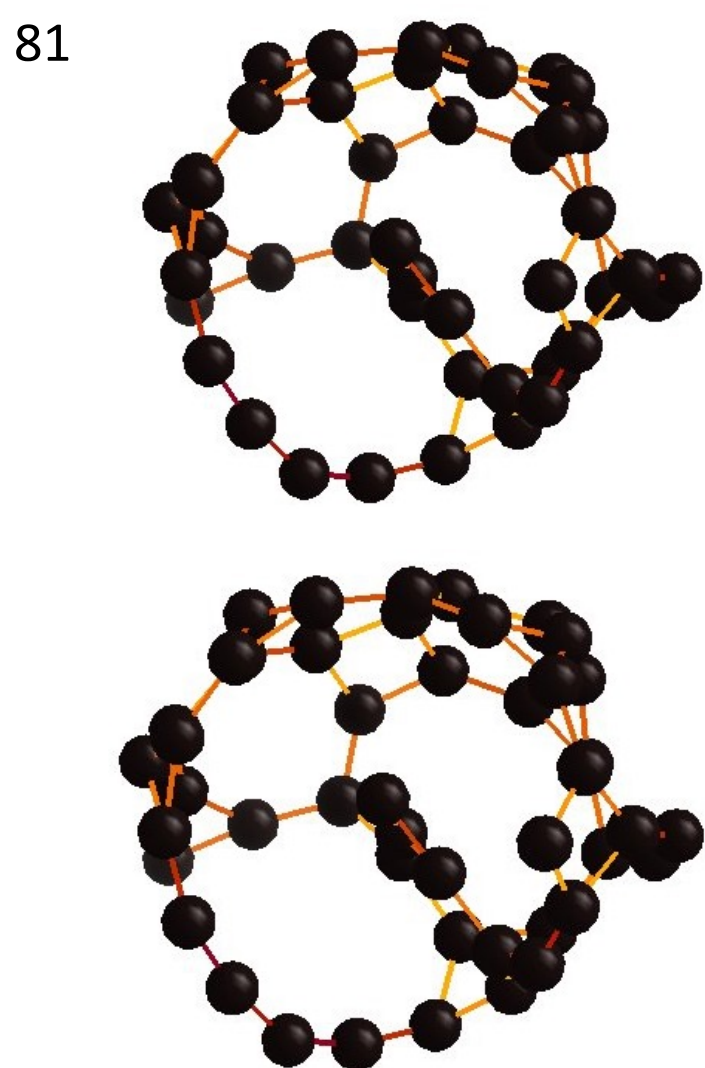

Supplement: d4cp02300e1.zip [file d4cp02300e1.zip]

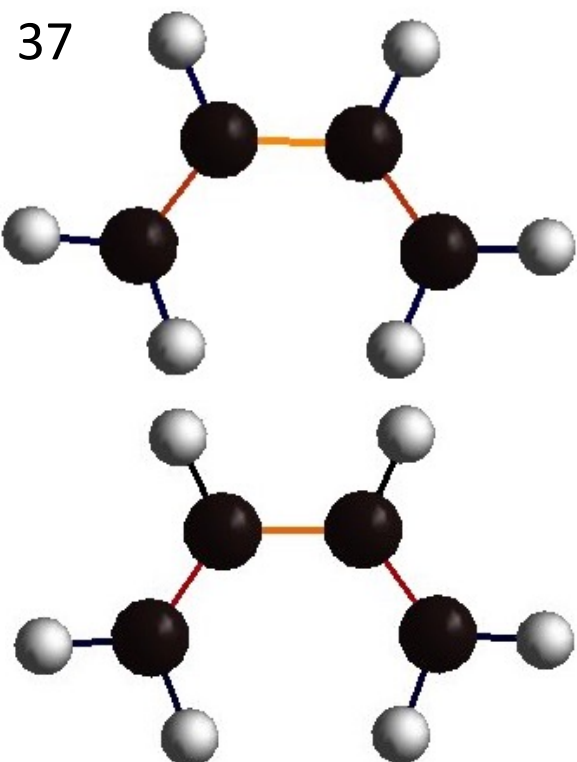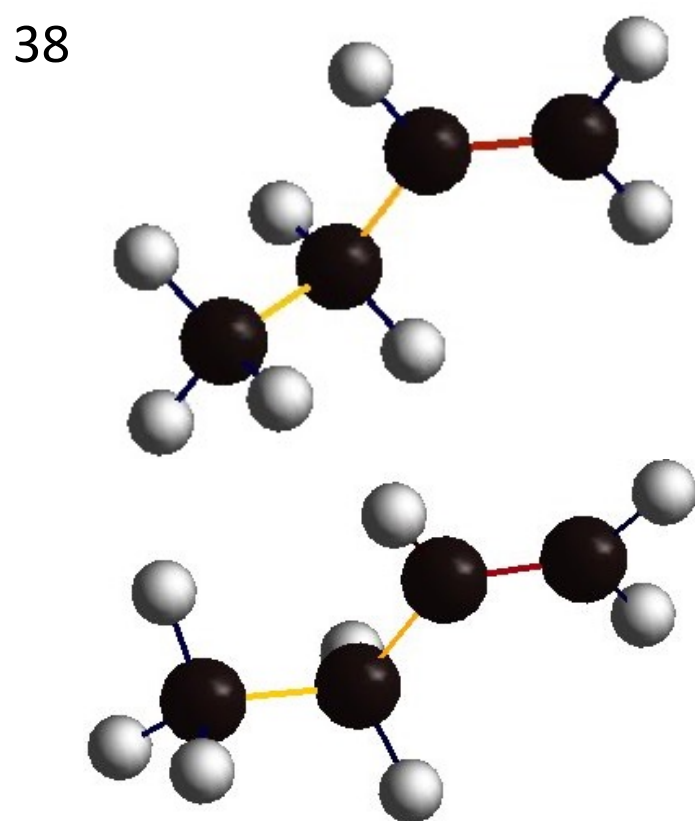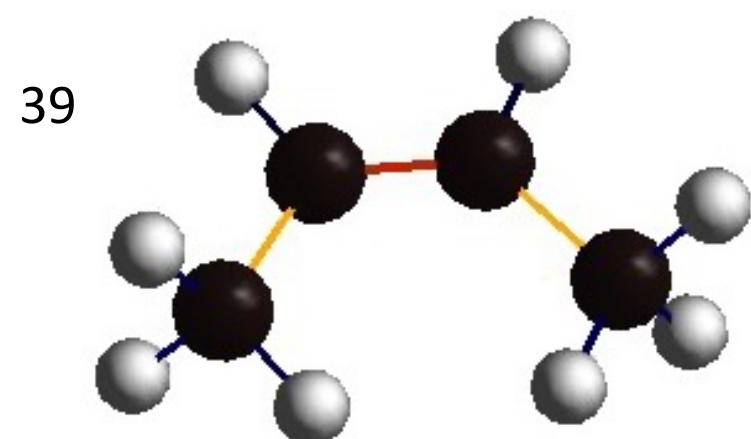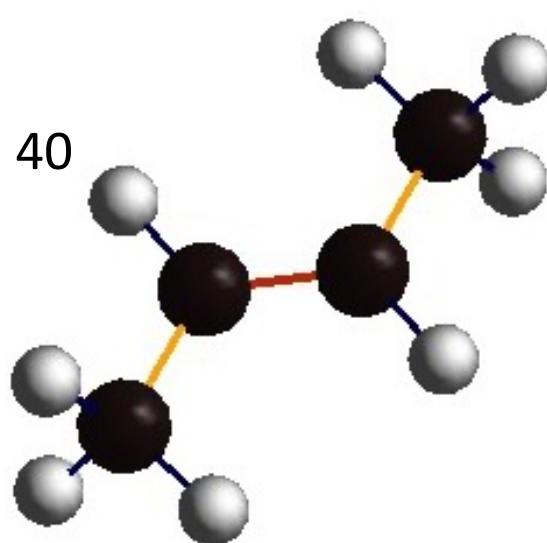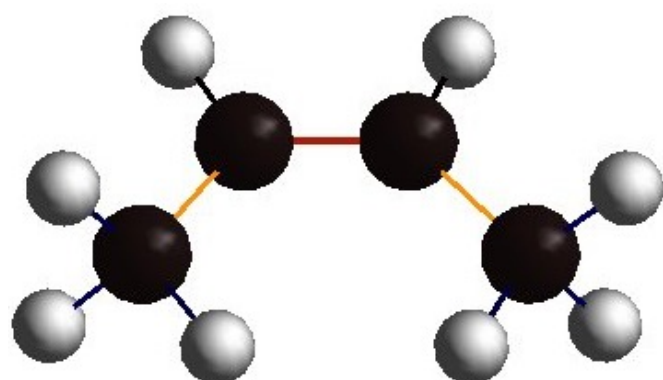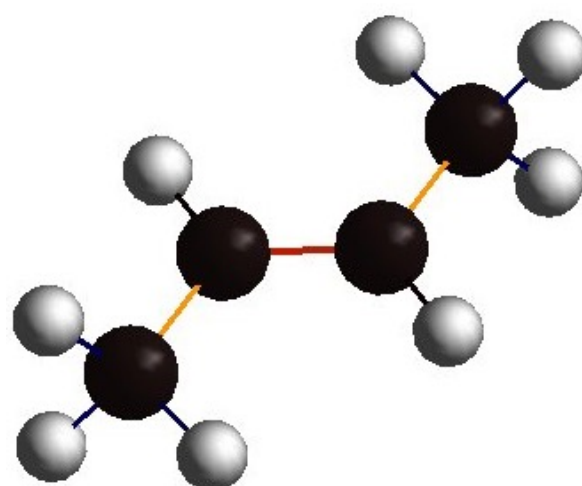

Supplement: d4cp02300e1.zip [file d4cp02300e1.zip]

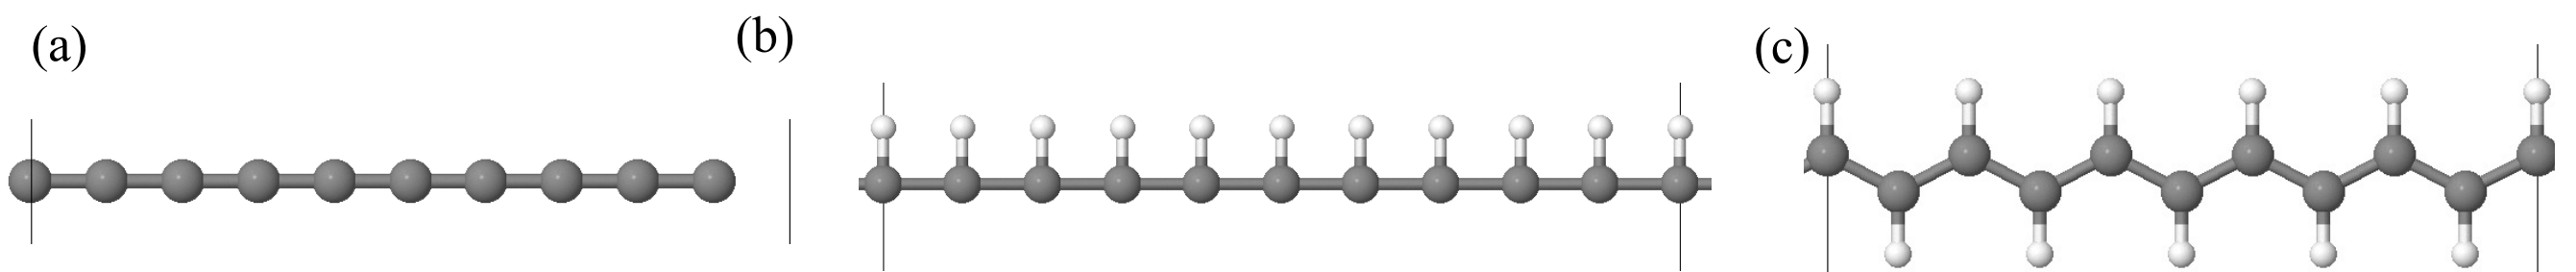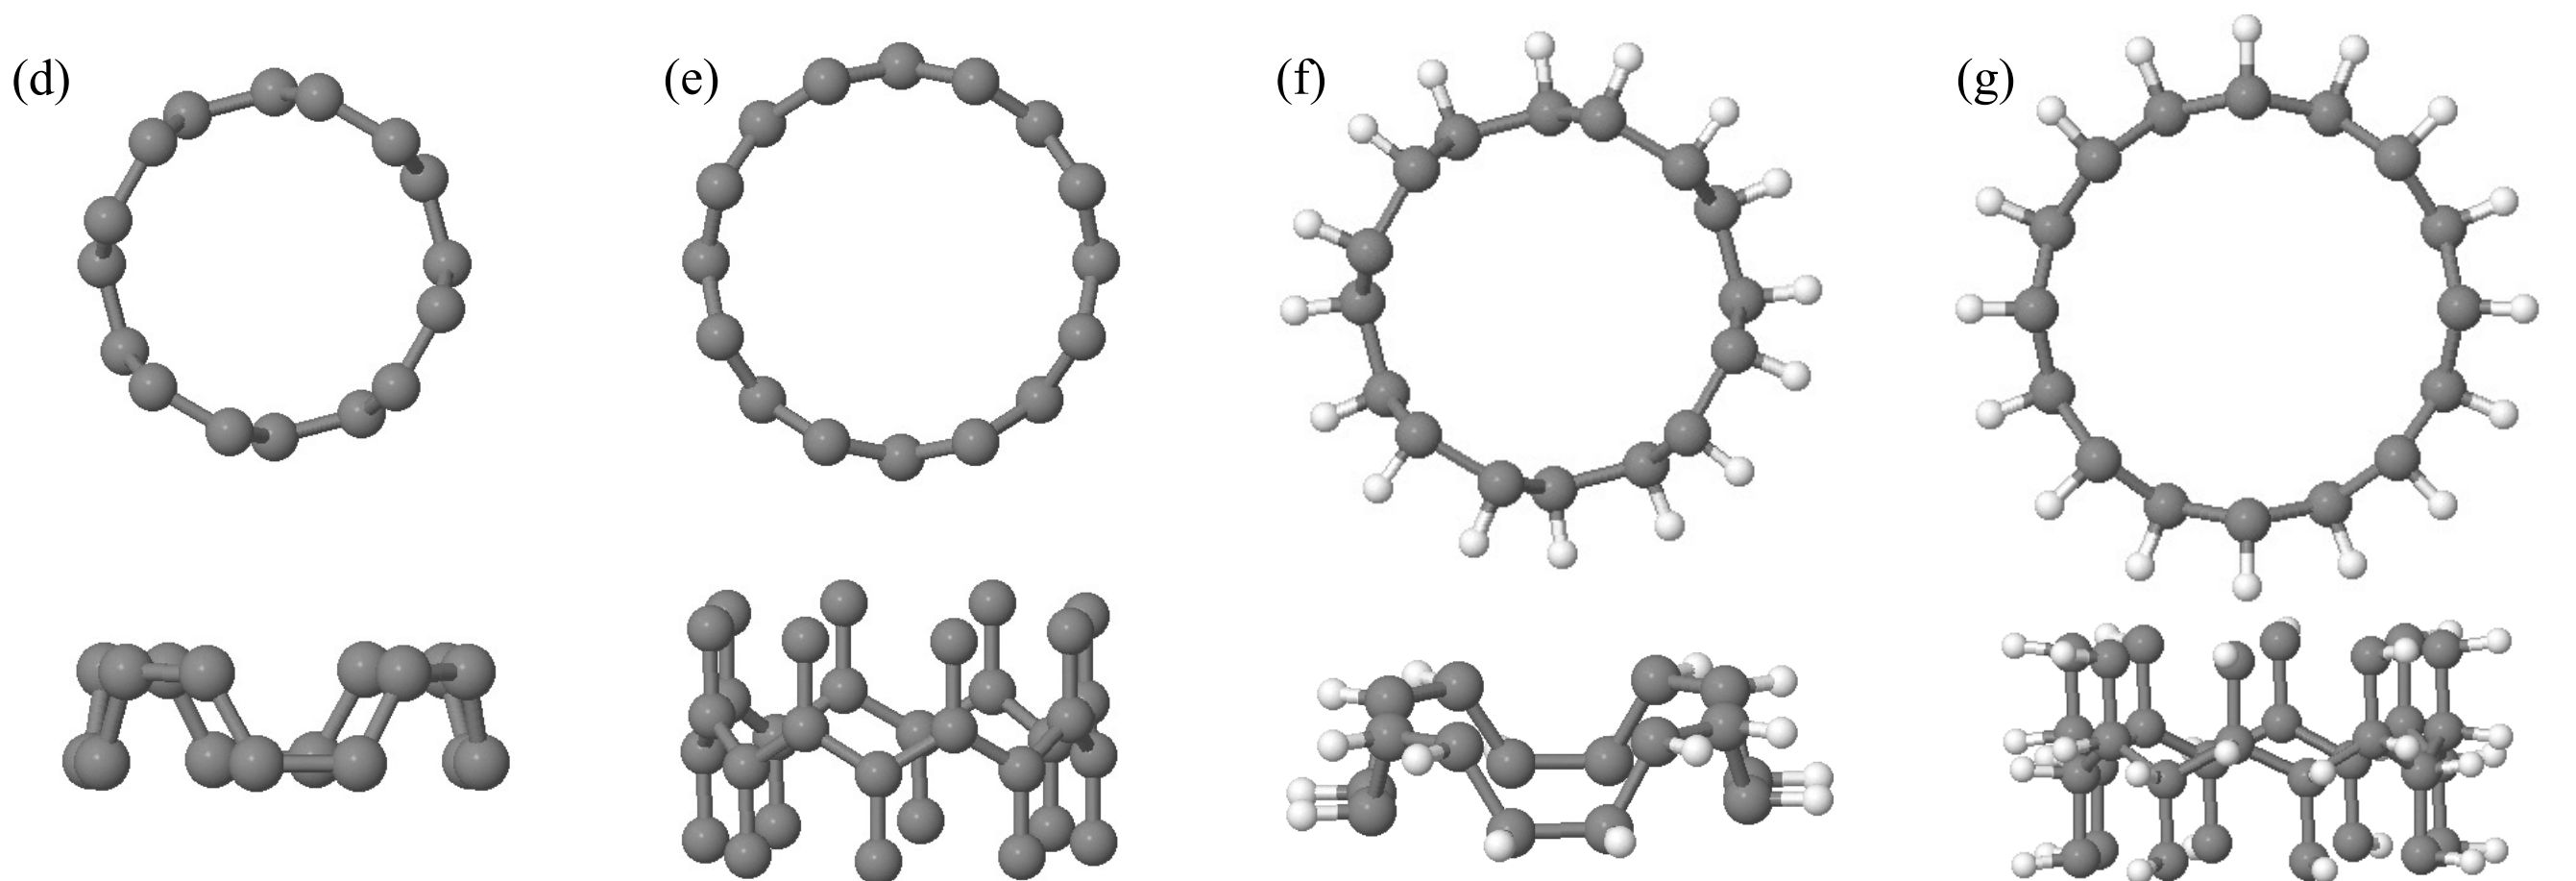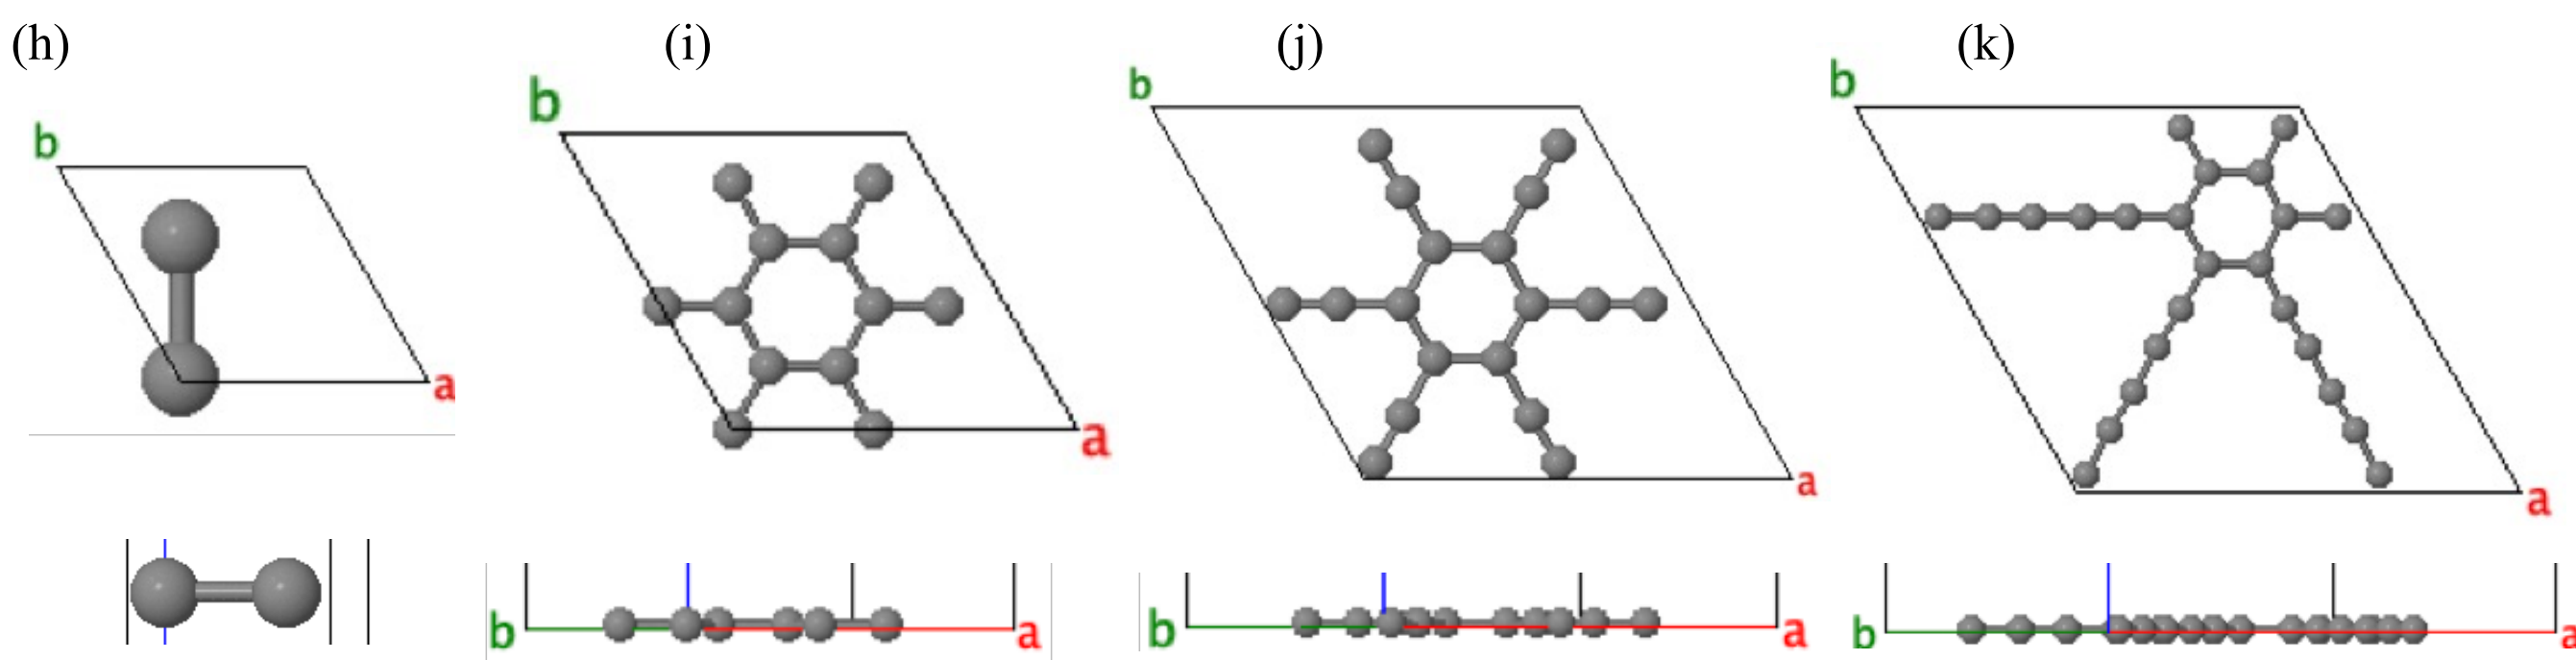

Supplement: d4cp02300e1.zip [file d4cp02300e1.zip]

(d)  $\Delta E = 2.5$  eV/atom

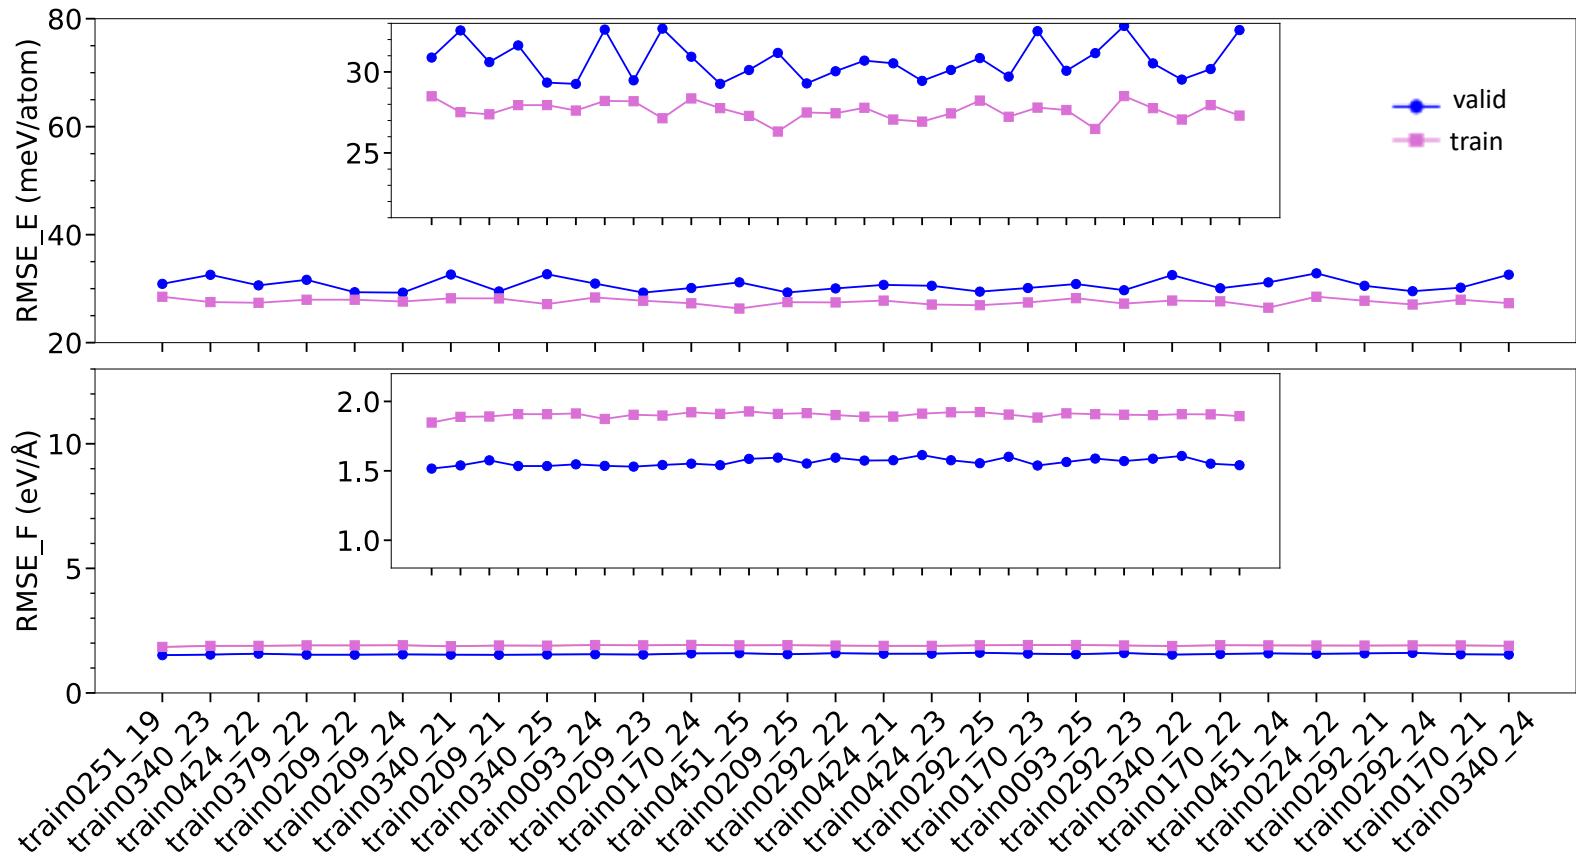

(e)  $\Delta E = 3.0$  eV/atom

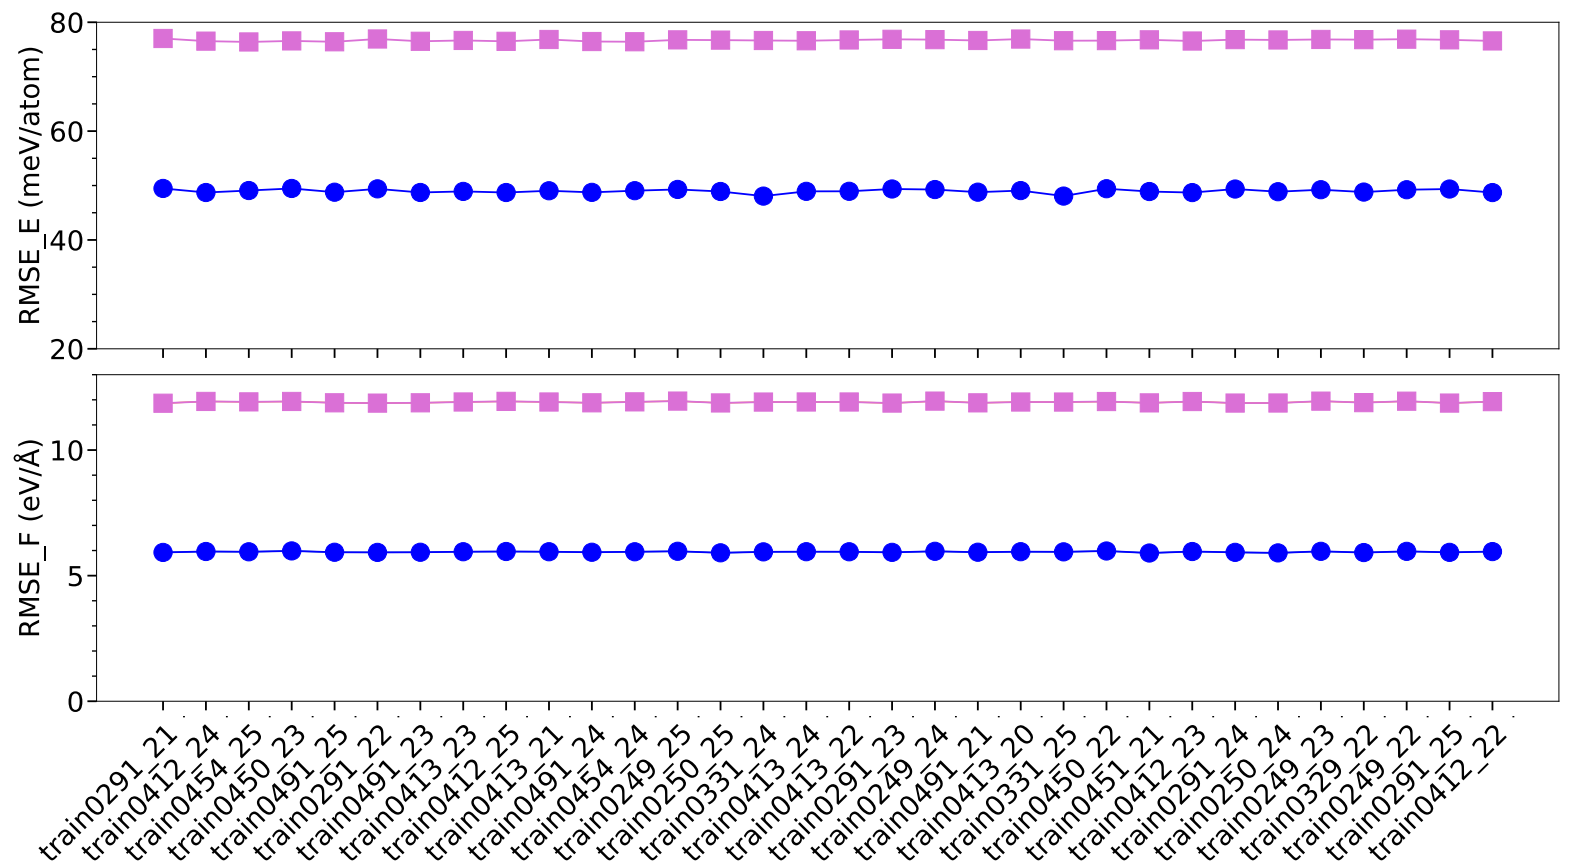

Supplement: d4cp02300e1.zip [file d4cp02300e1.zip]

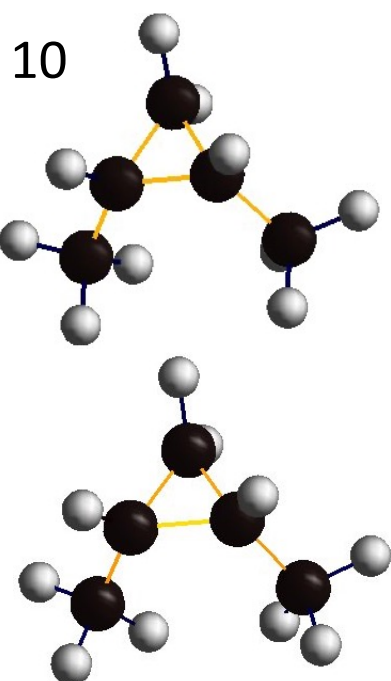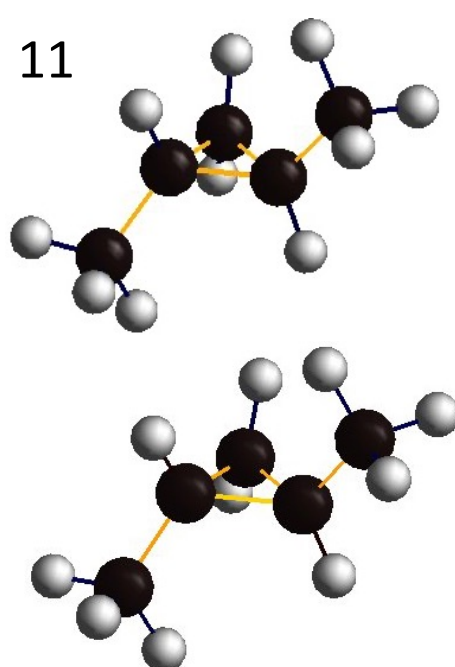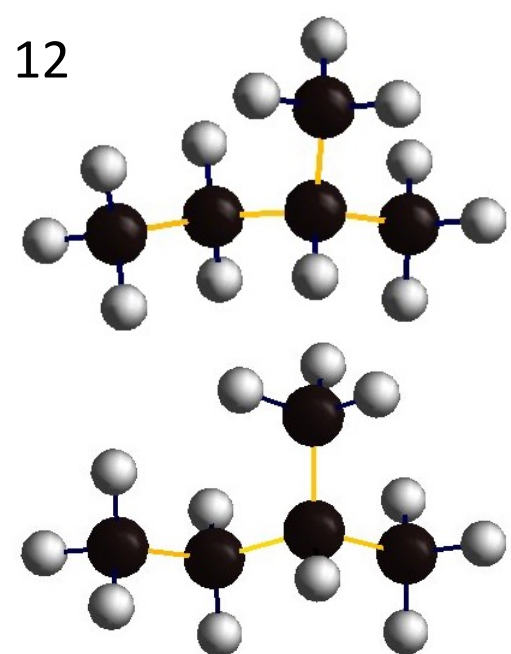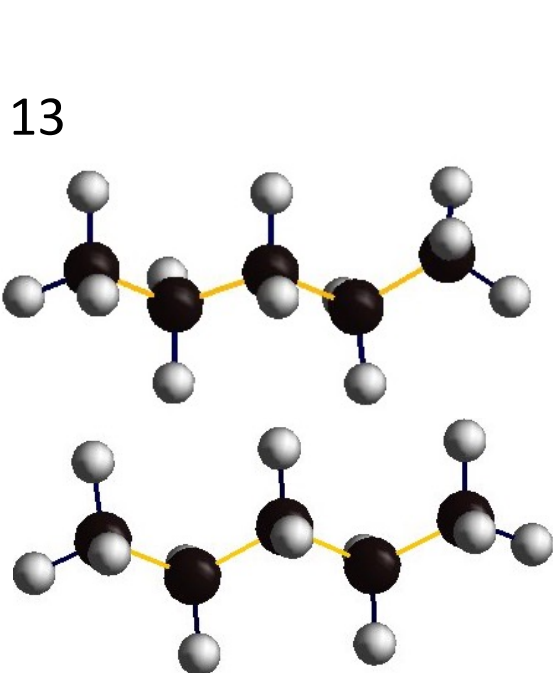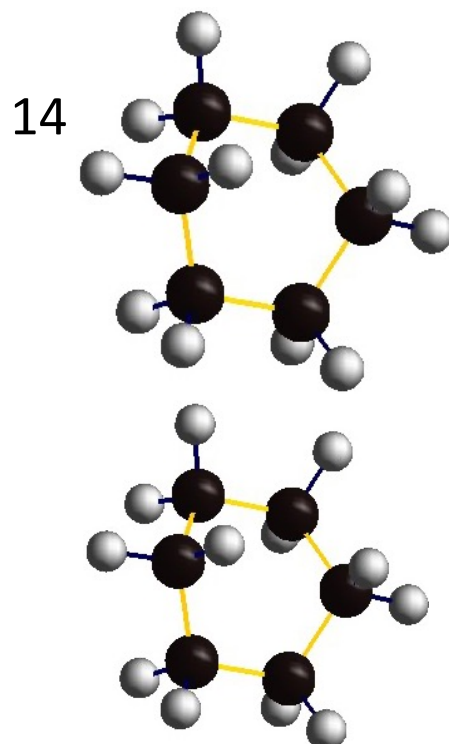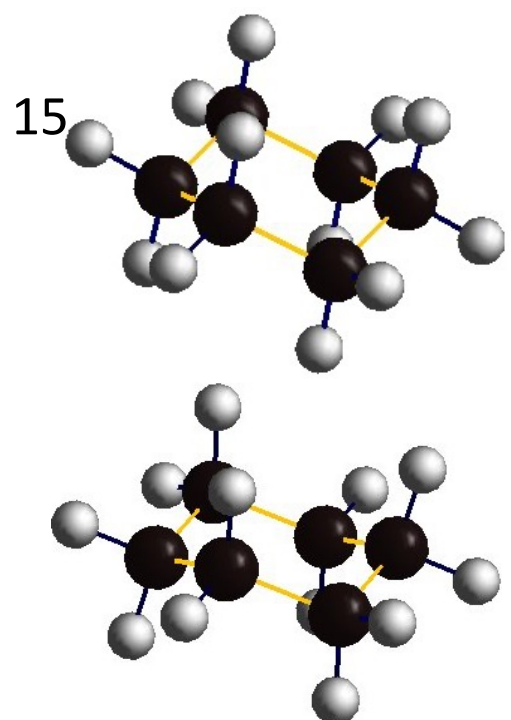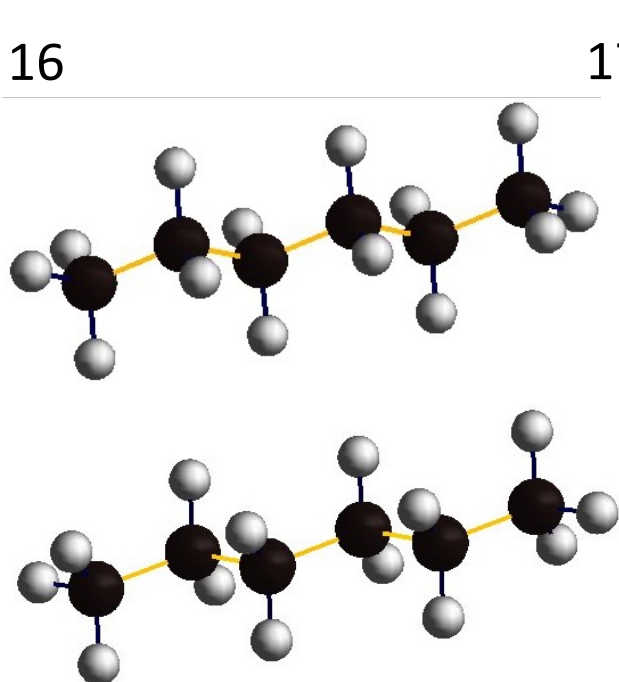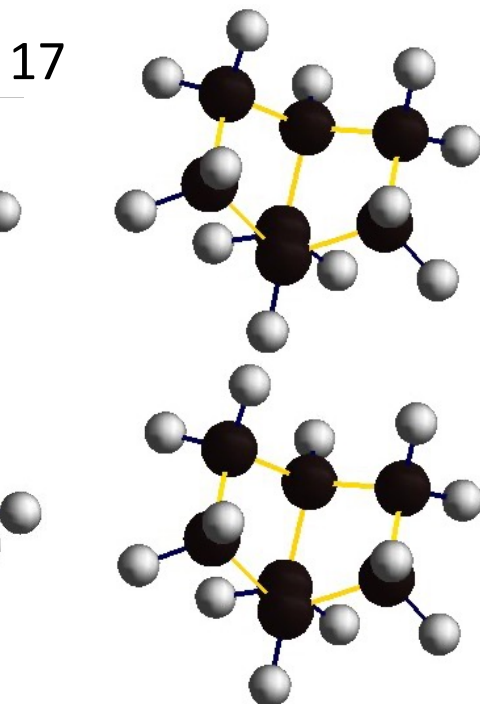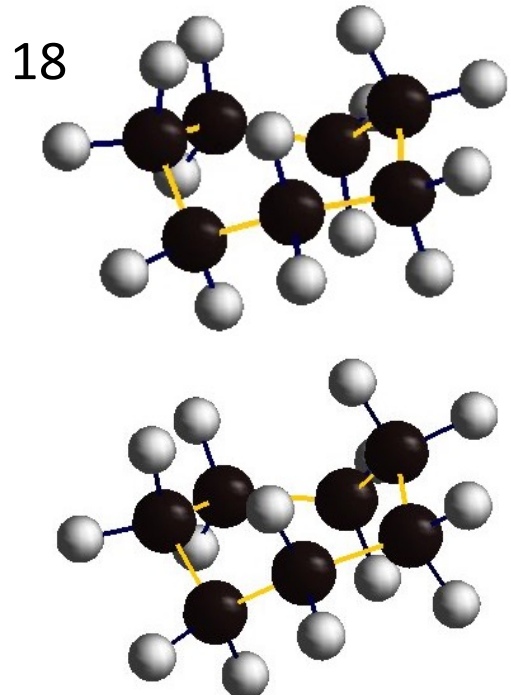

Supplement: d4cp02300e1.zip [file d4cp02300e1.zip]

25

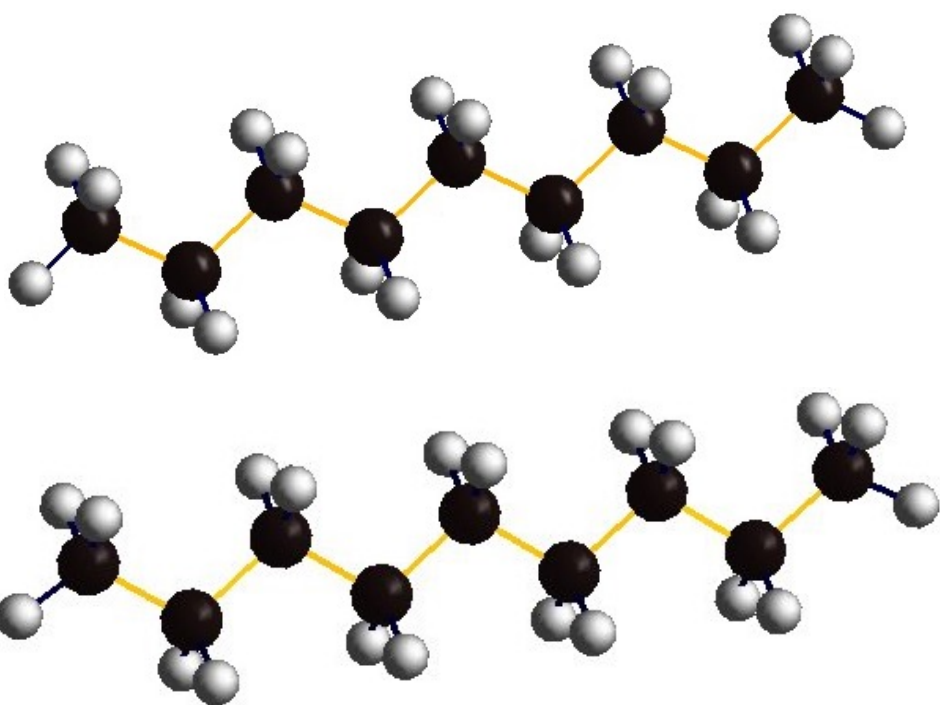

26

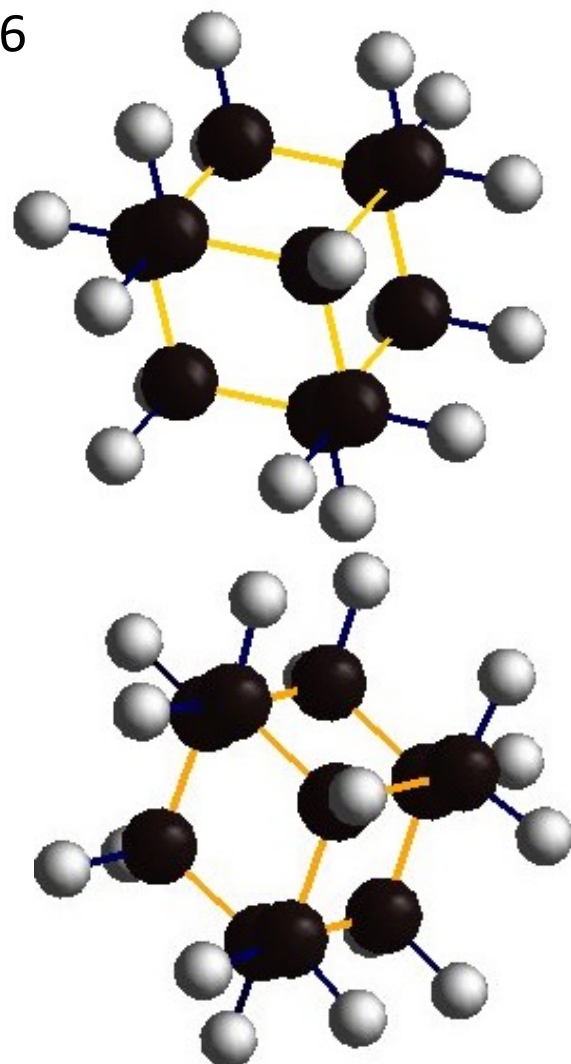

27

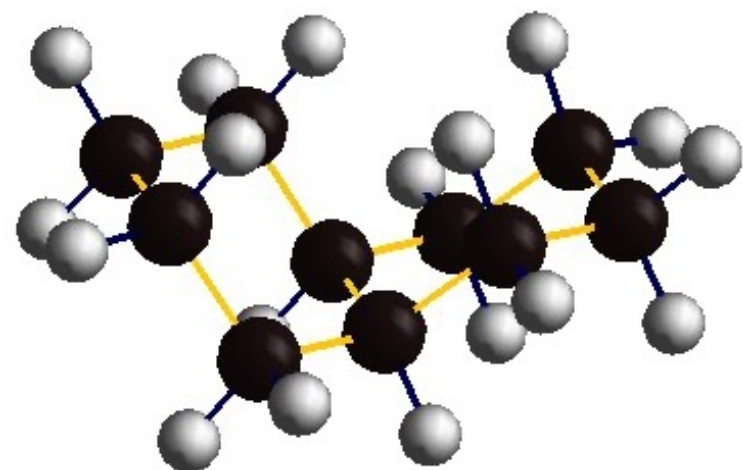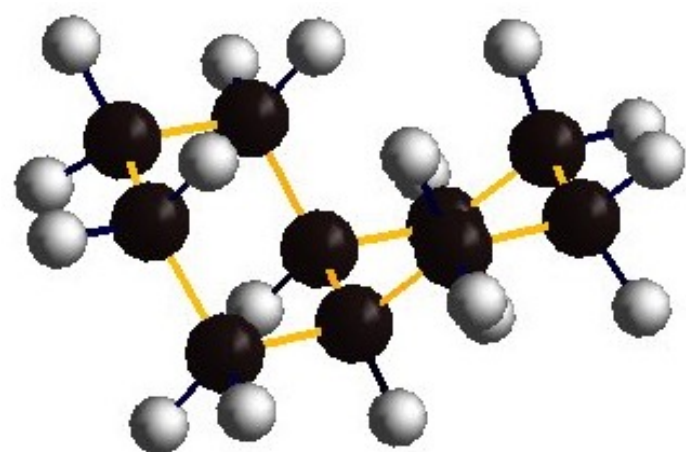

28

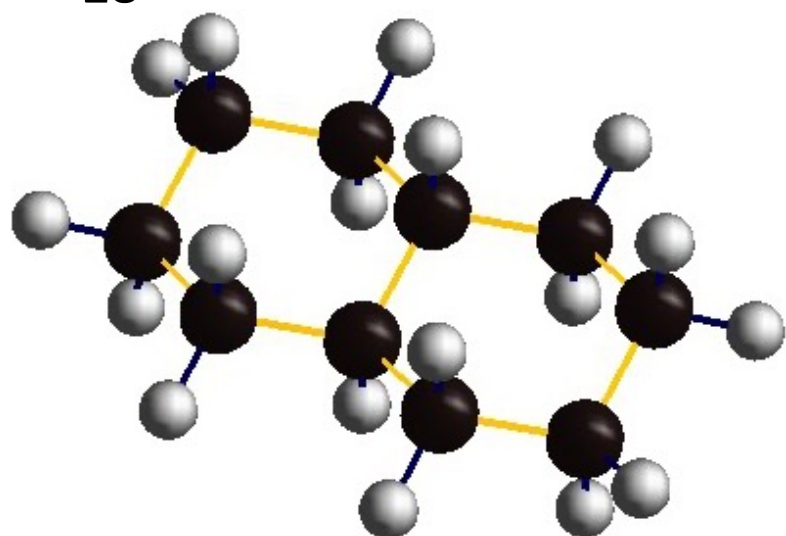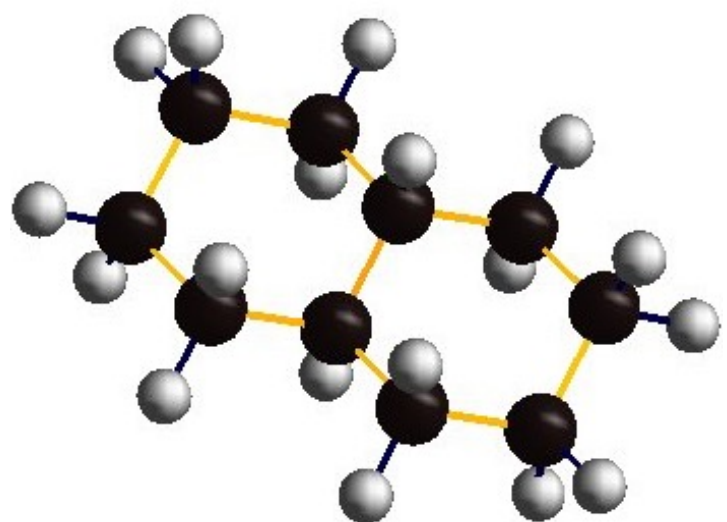

Supplement: d4cp02300e1.zip [file d4cp02300e1.zip]

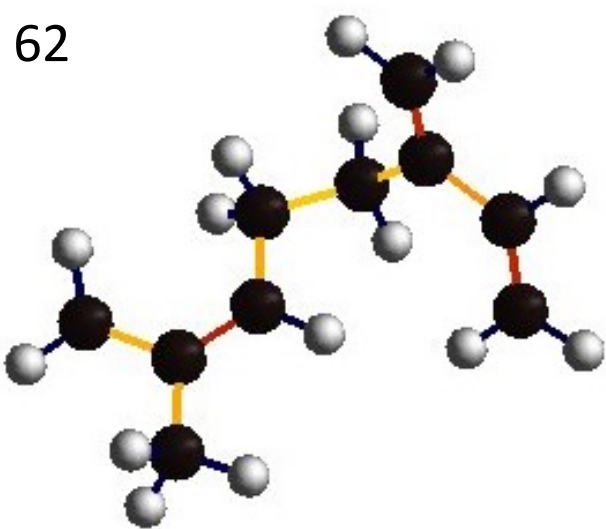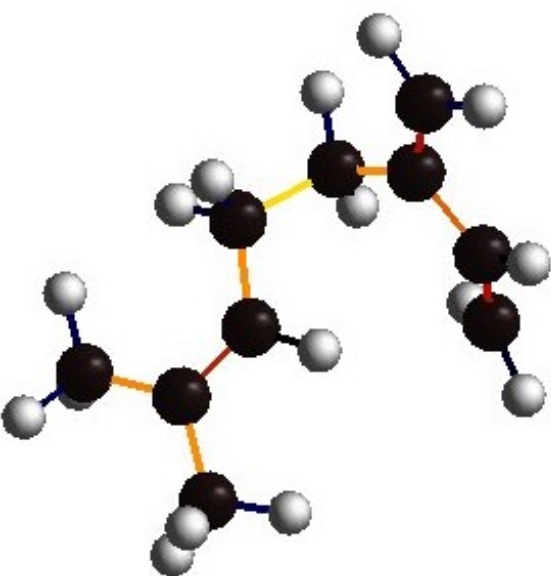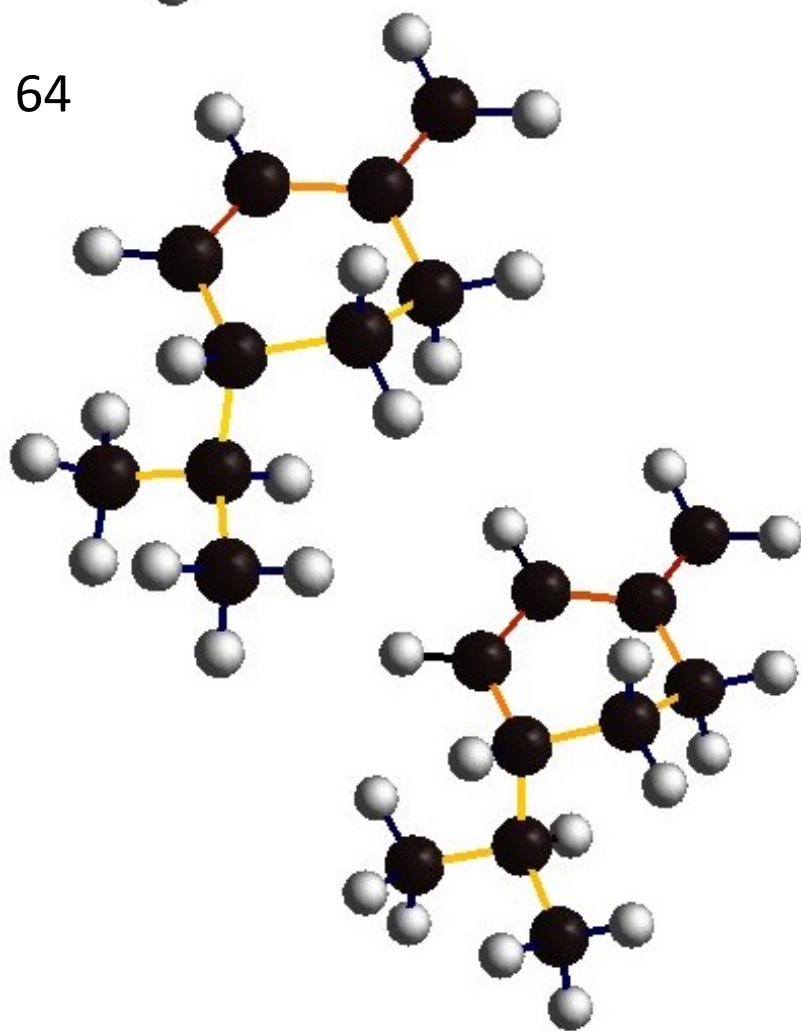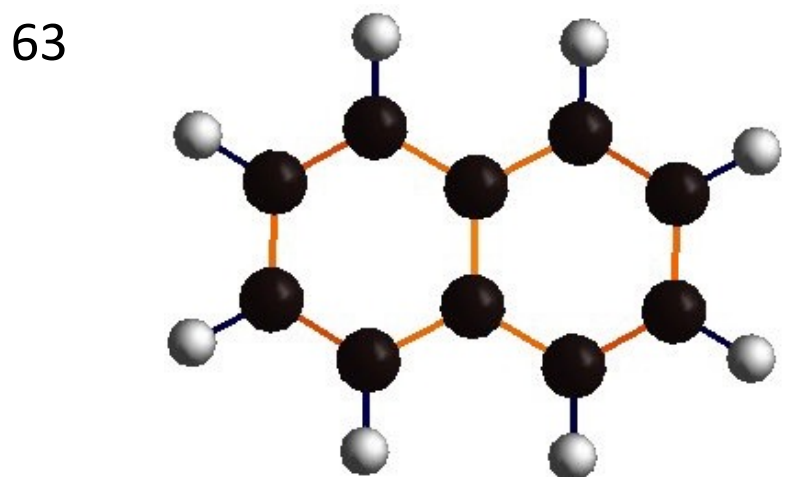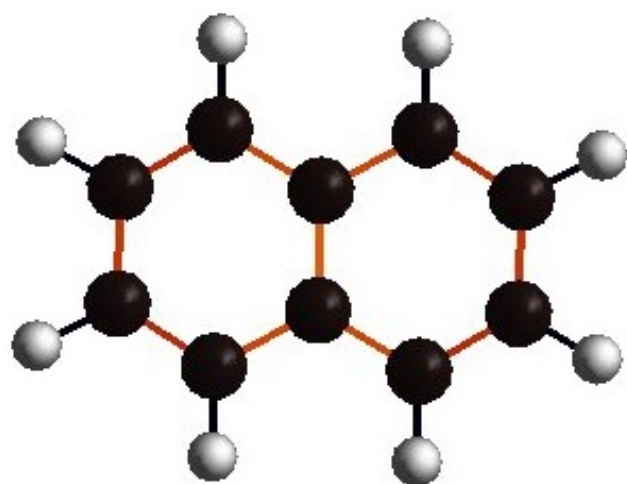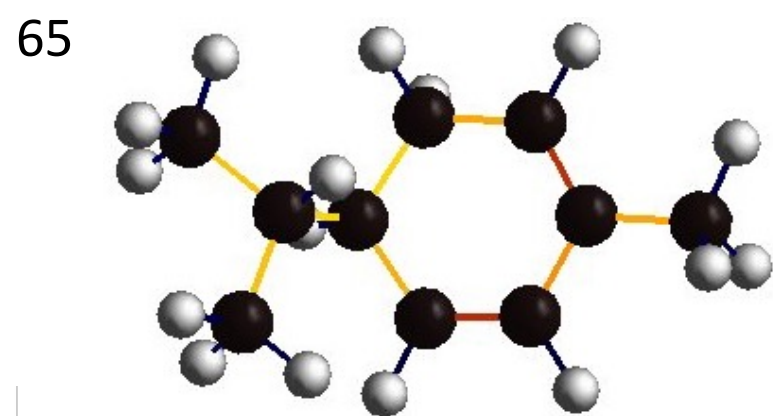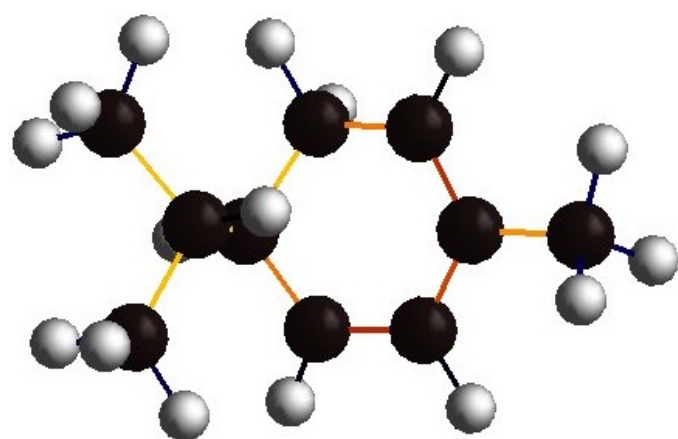

Supplement: d4cp02300e1.zip [file d4cp02300e1.zip]

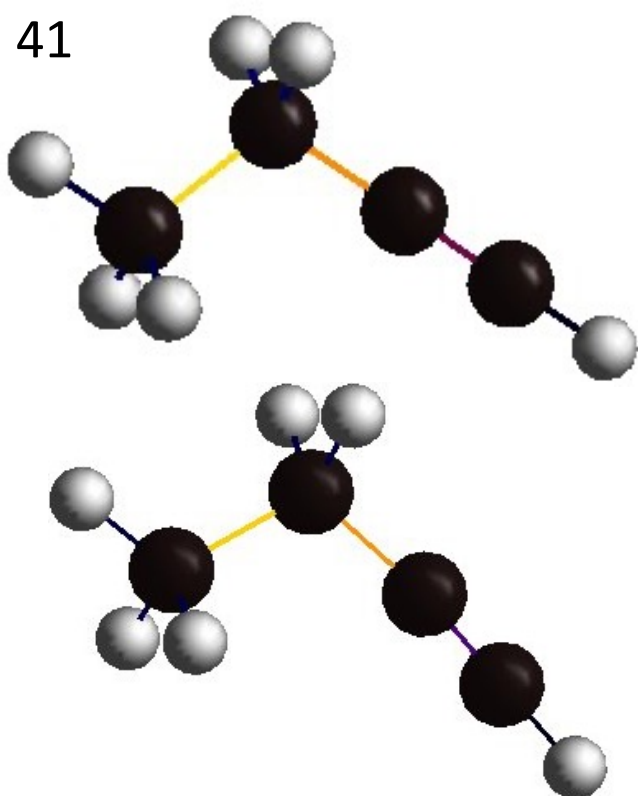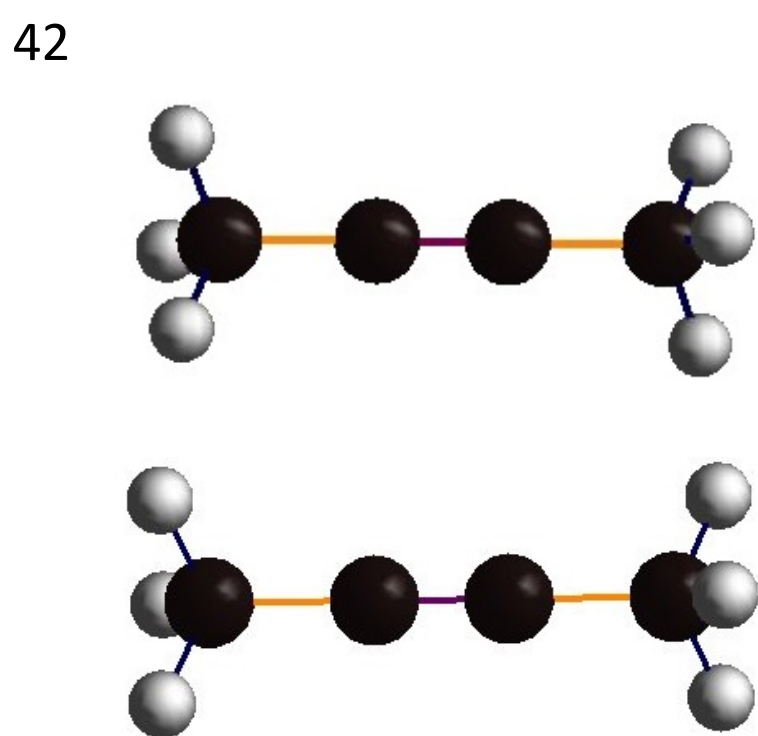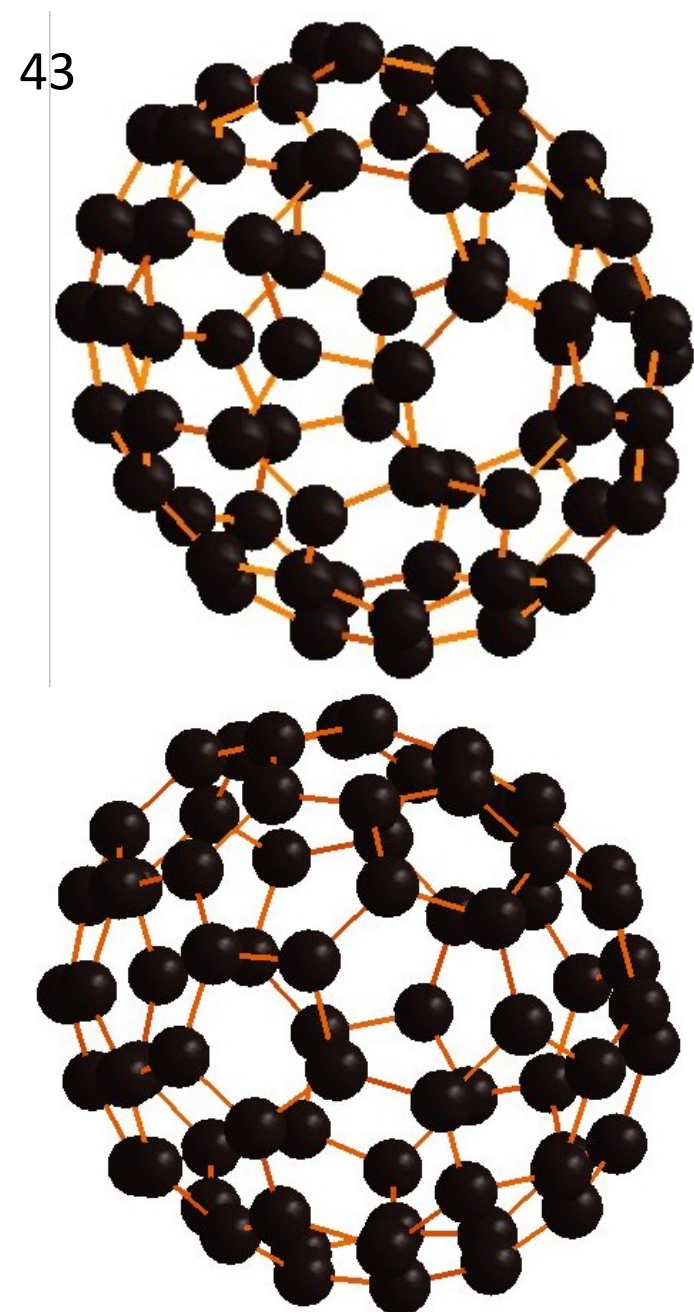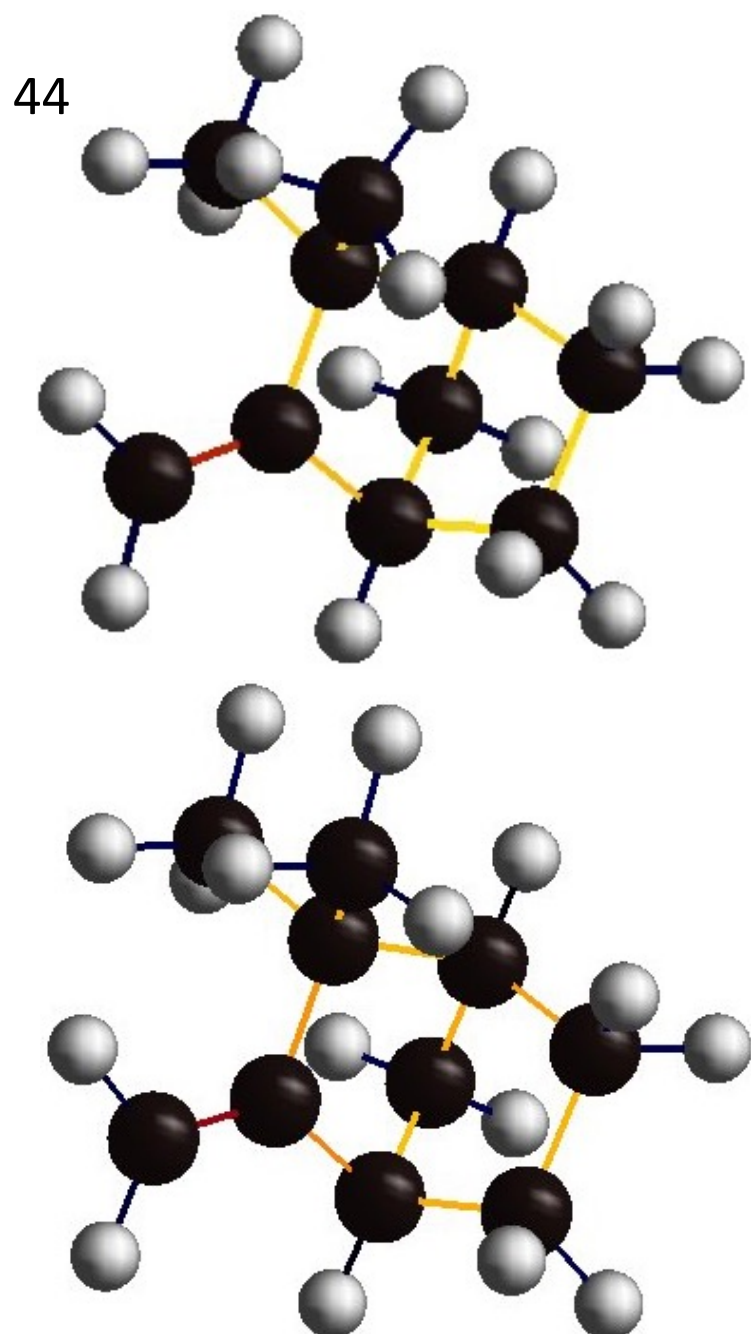

Supplement: d4cp02300e1.zip [file d4cp02300e1.zip]

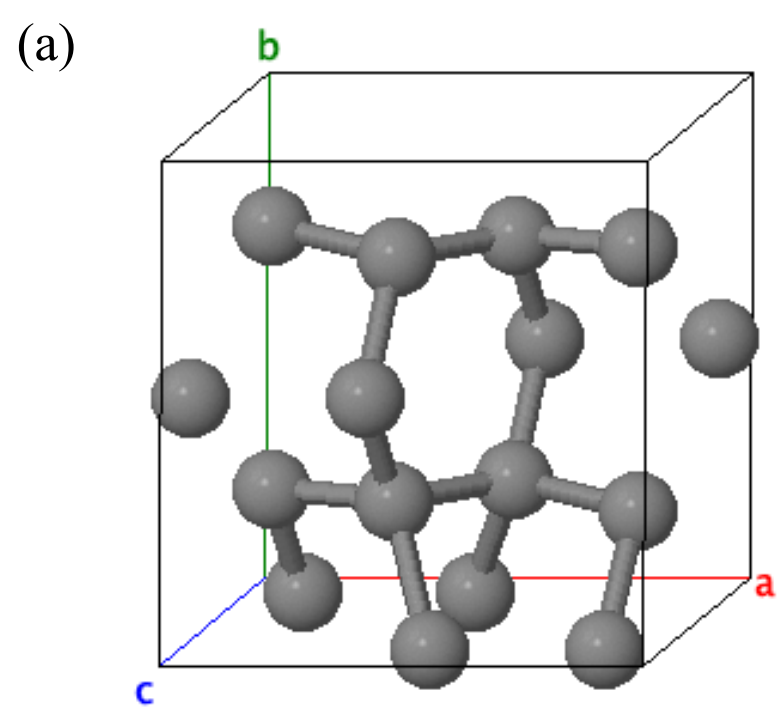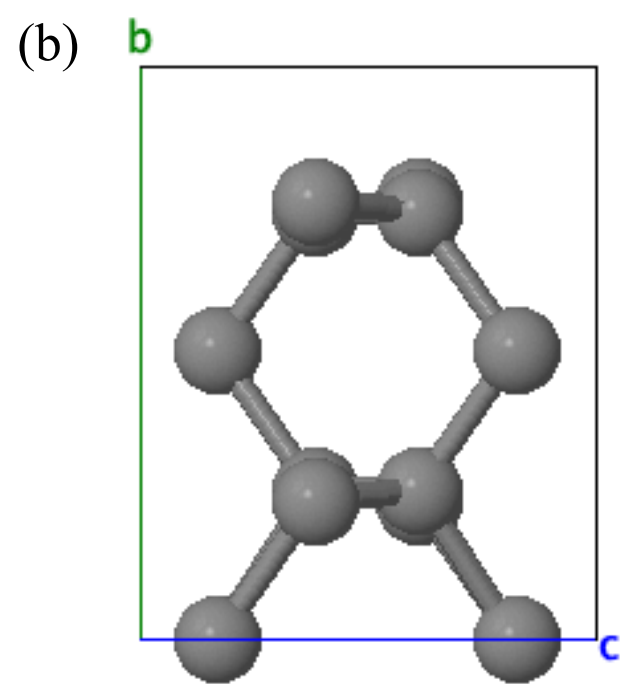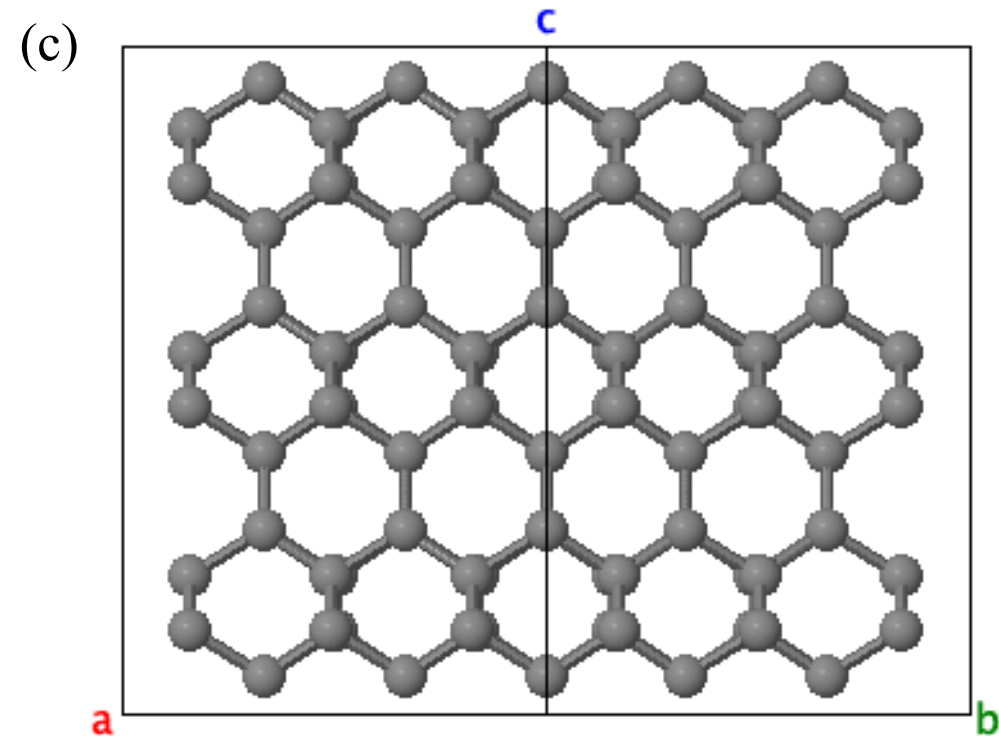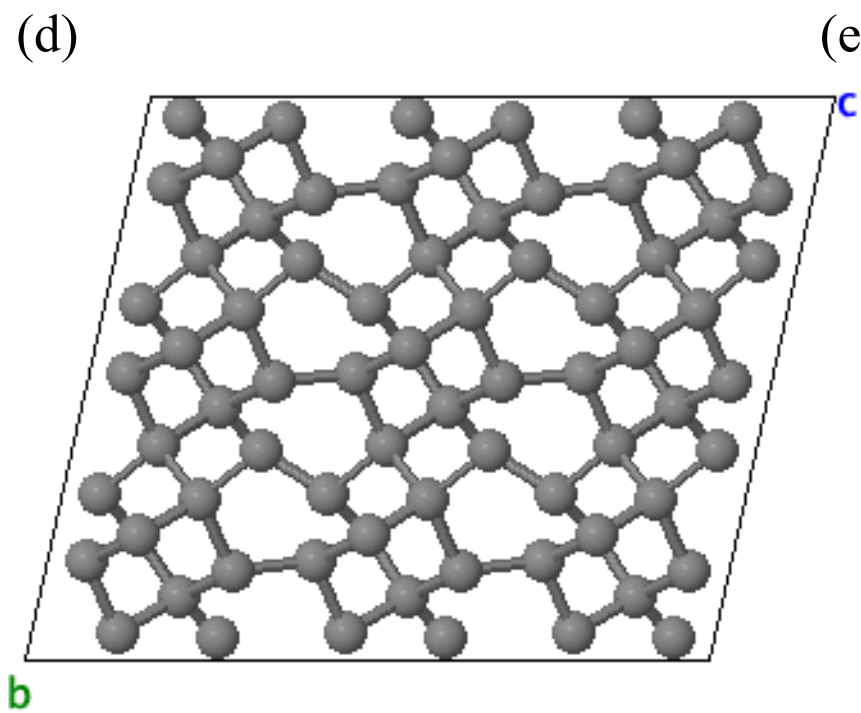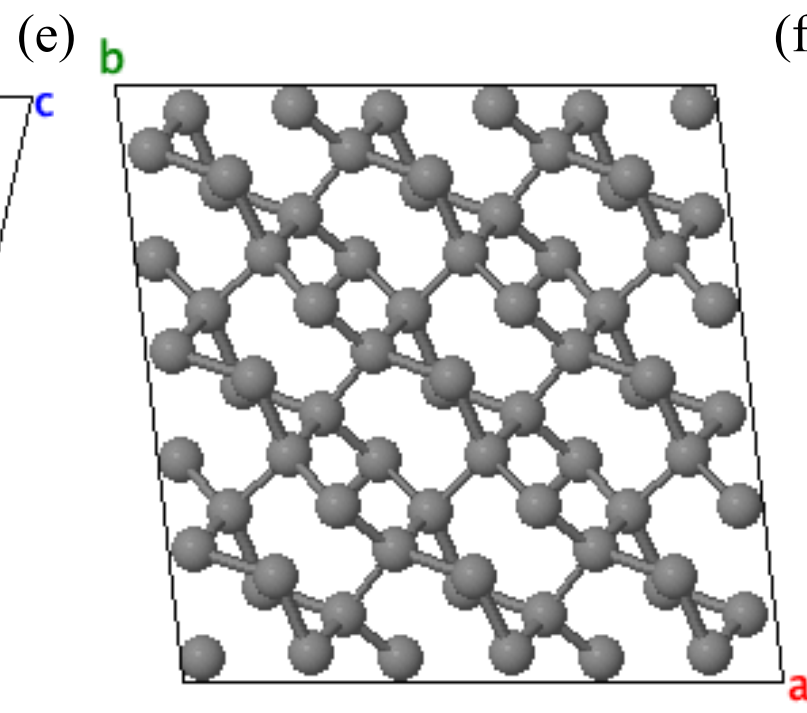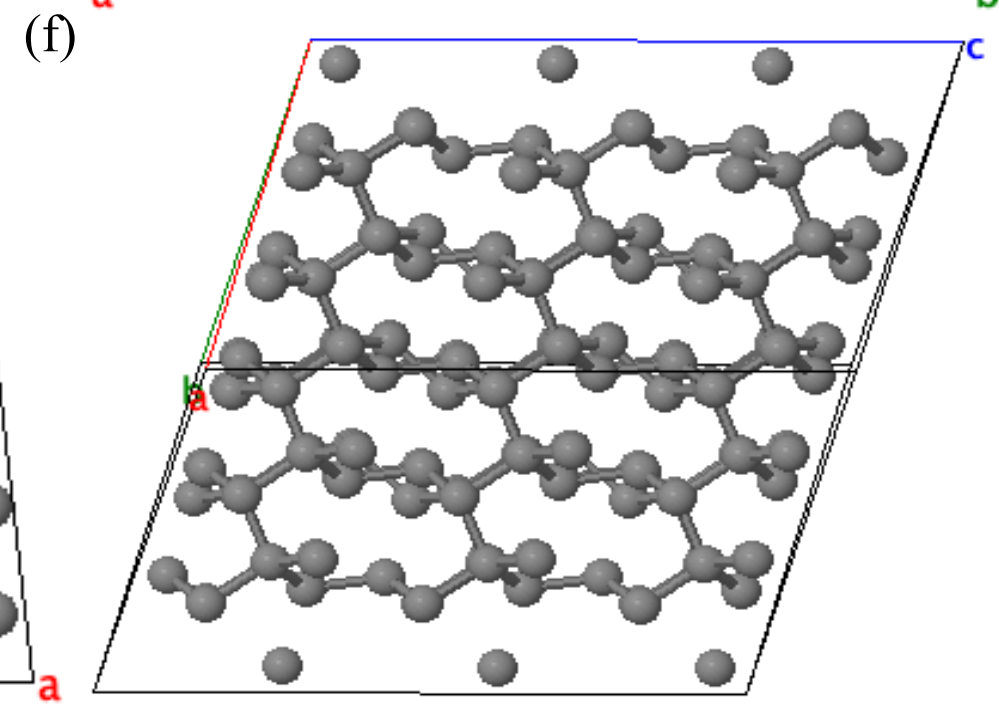

Supplement: d4cp02300e1.zip [file d4cp02300e1.zip]

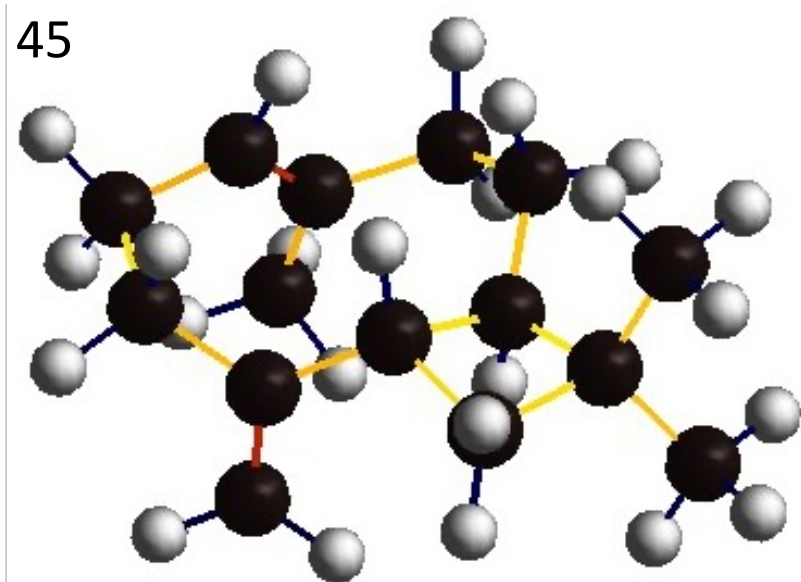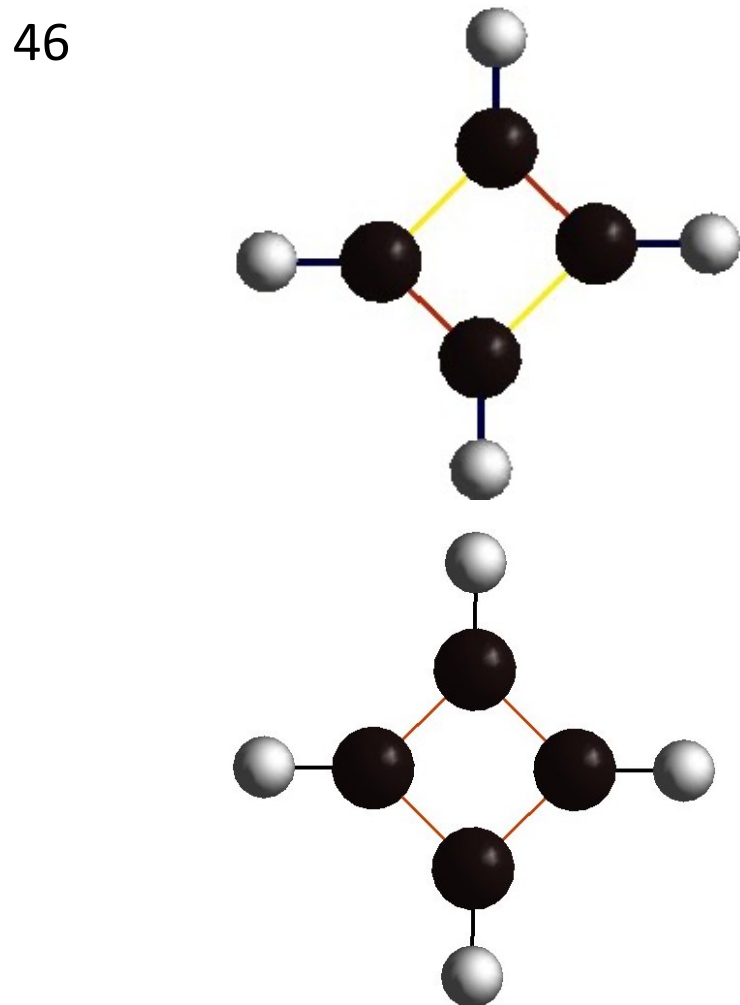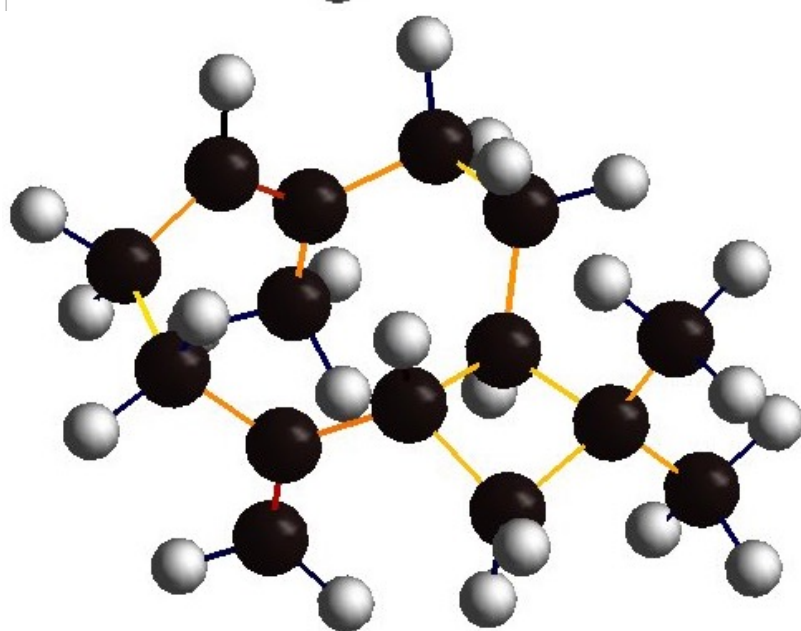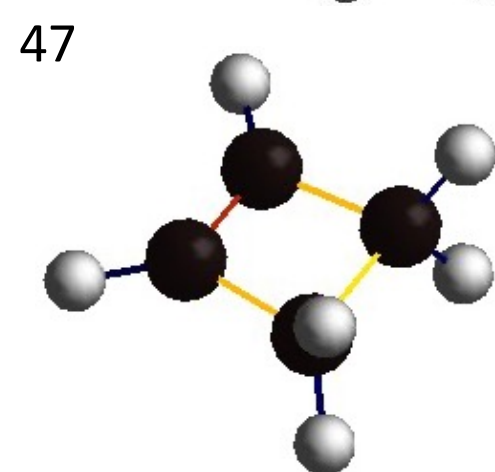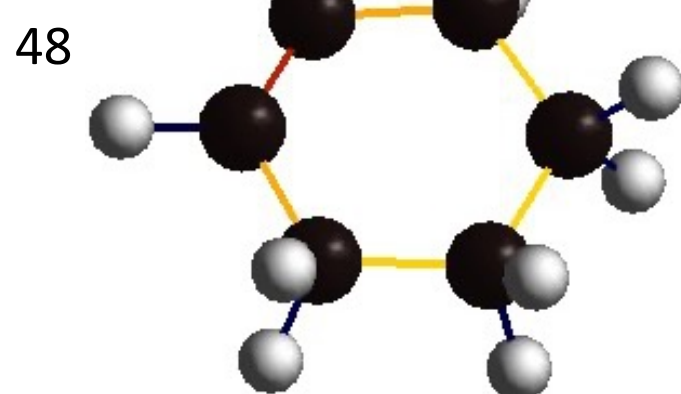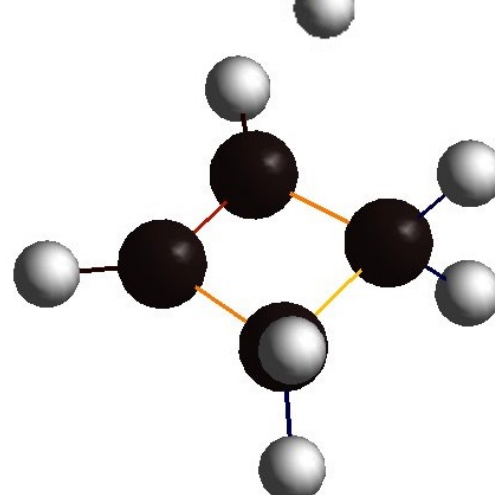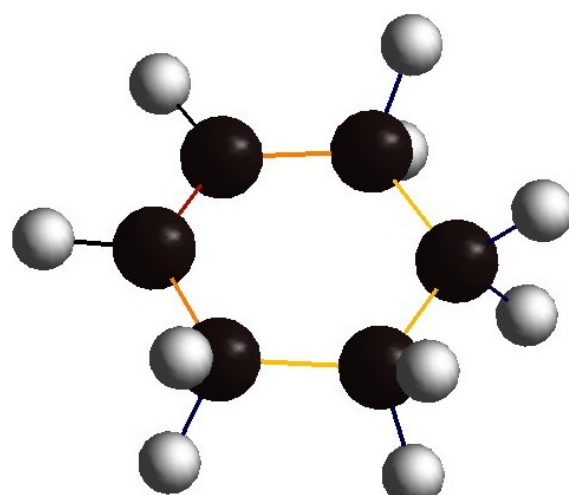

Supplement: d4cp02300e1.zip [file d4cp02300e1.zip]

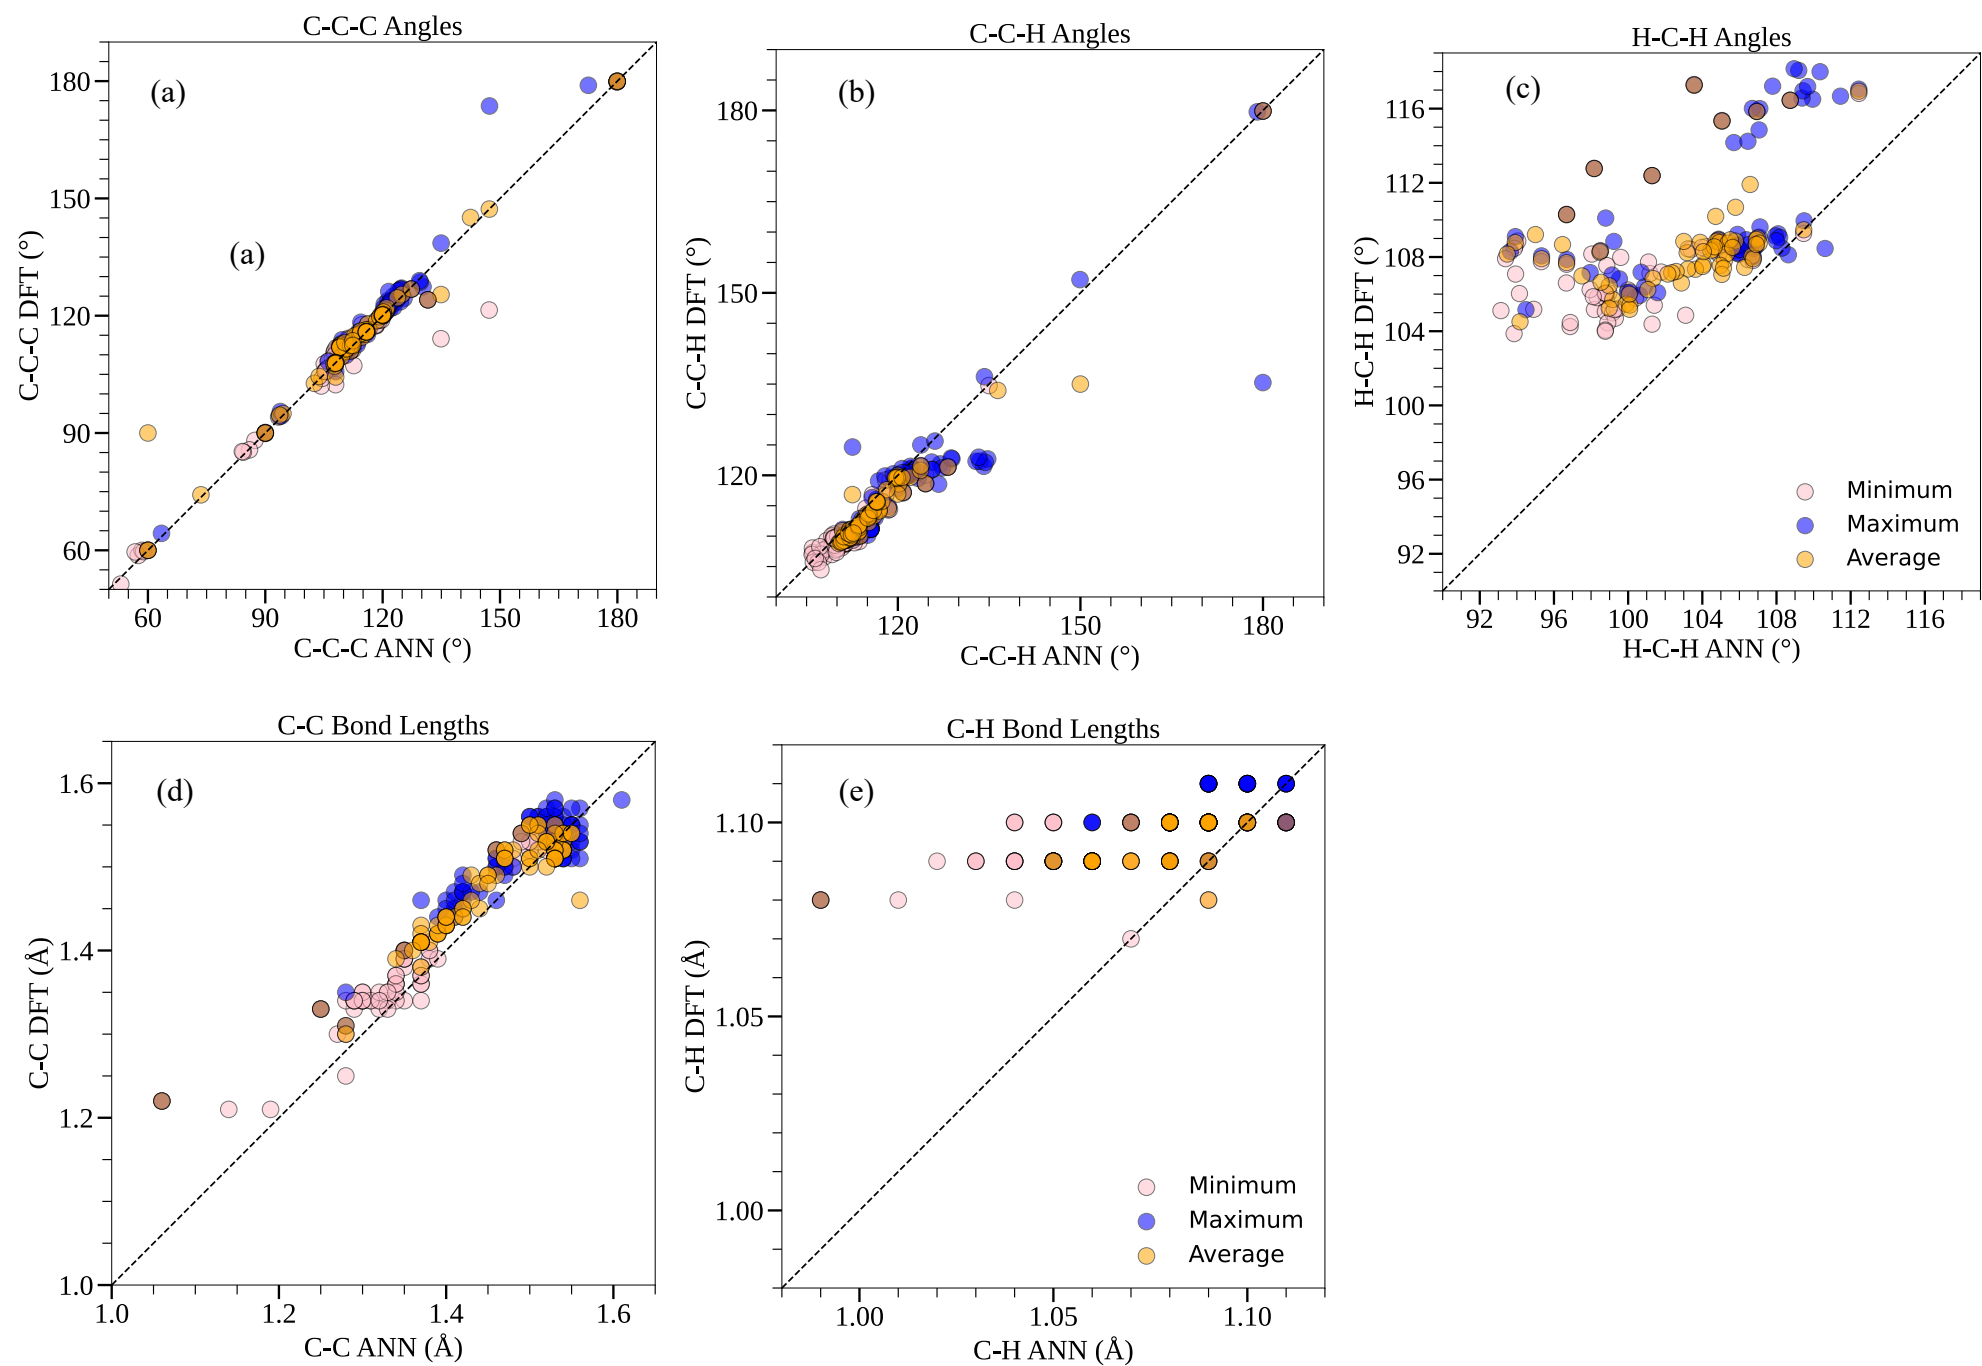

Supplement: d4cp02300e1.zip [file d4cp02300e1.zip]

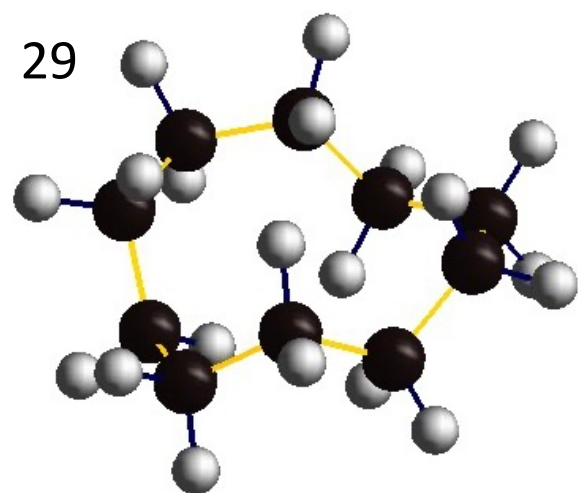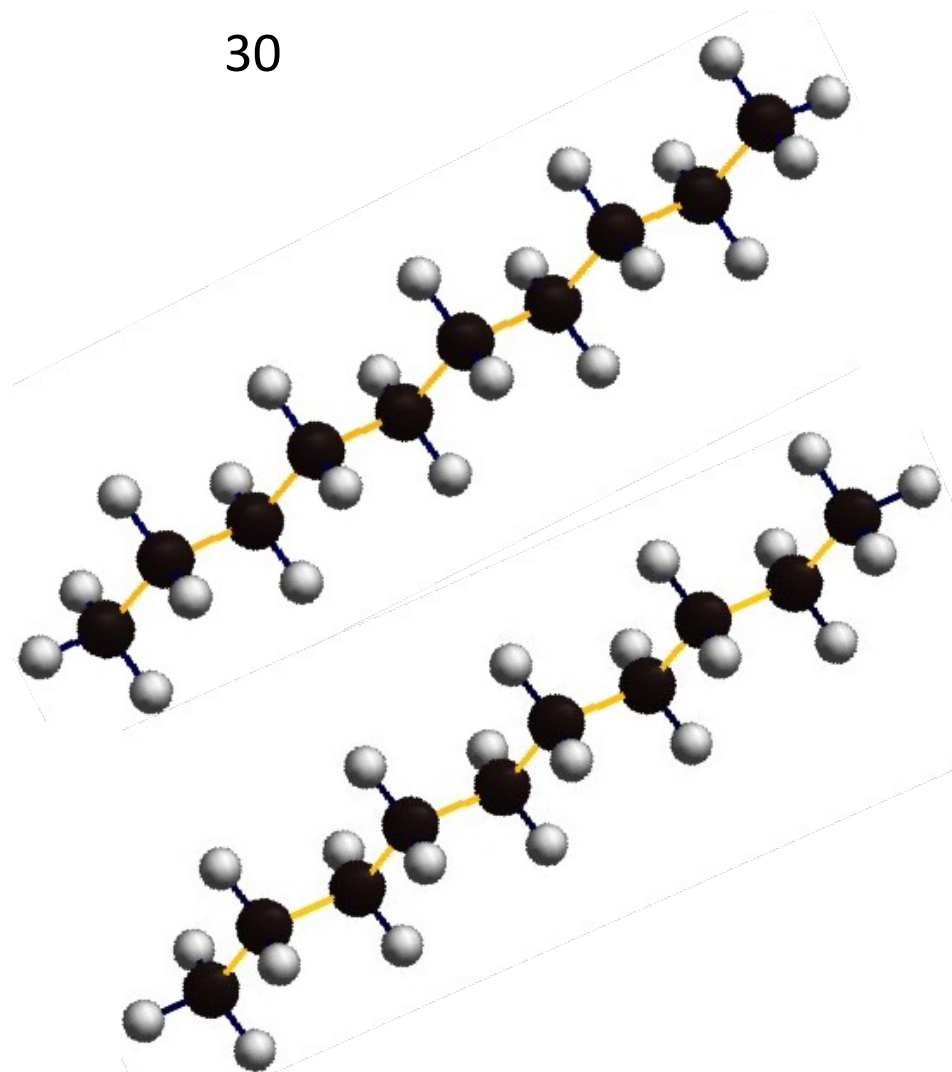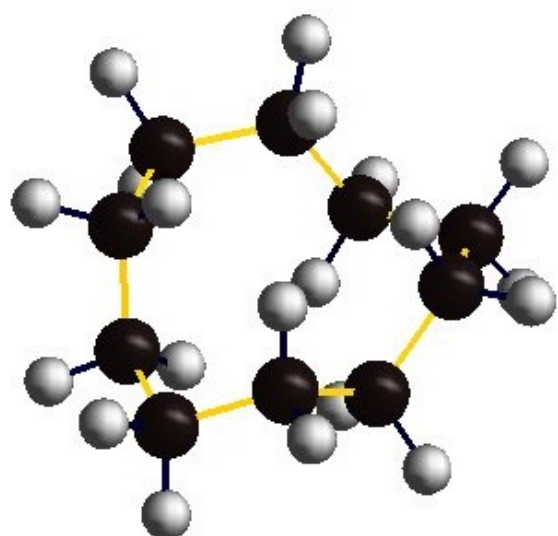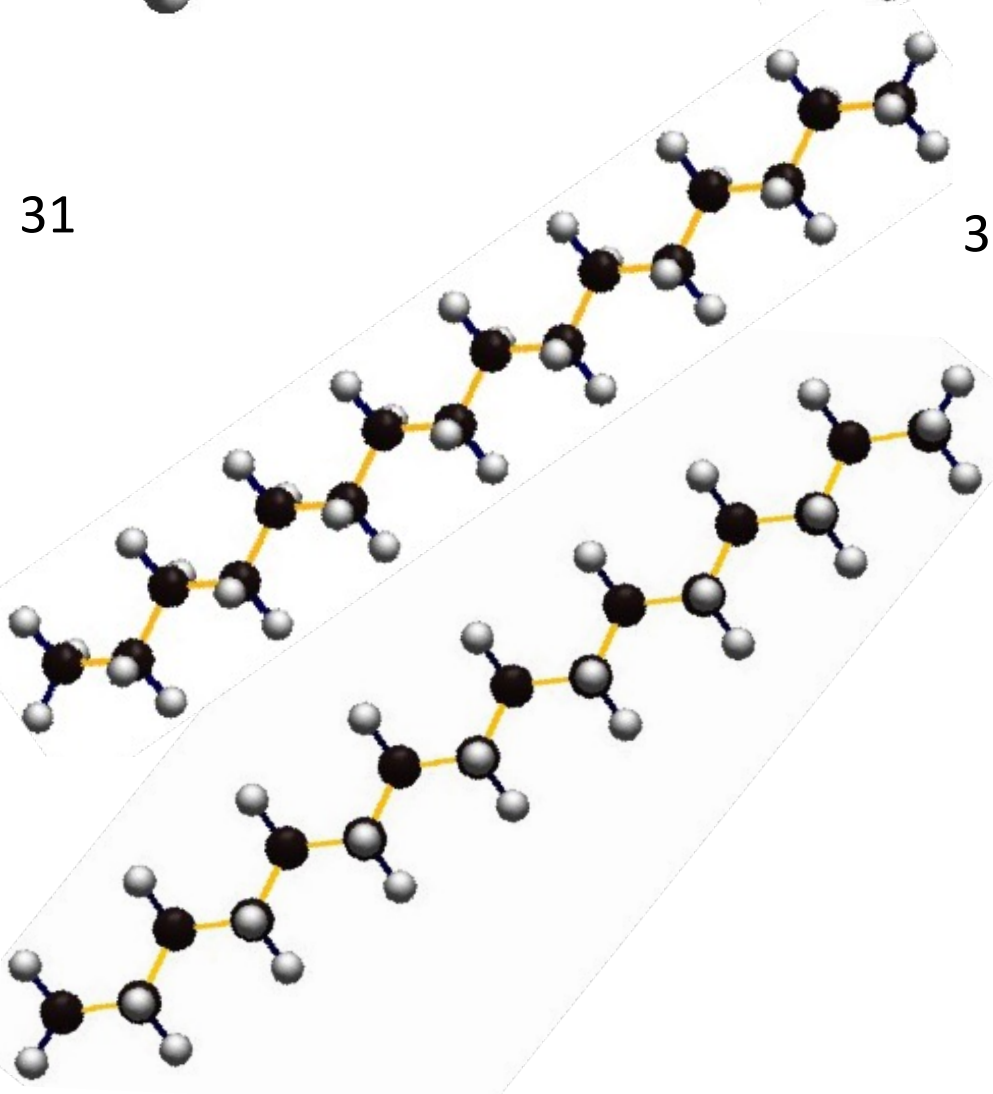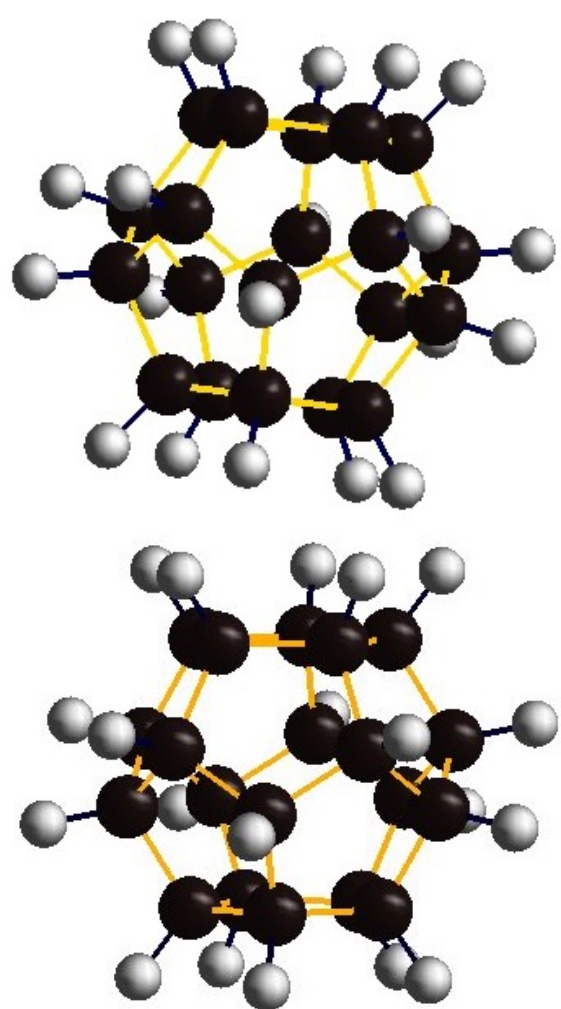

Supplement: d4cp02300e1.zip [file d4cp02300e1.zip]

70

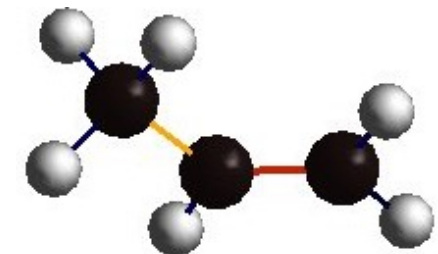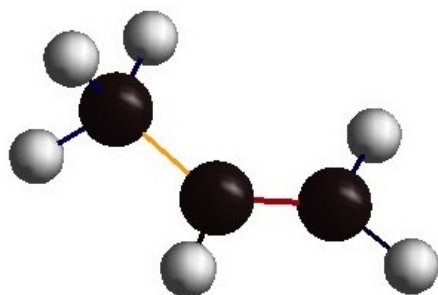

71

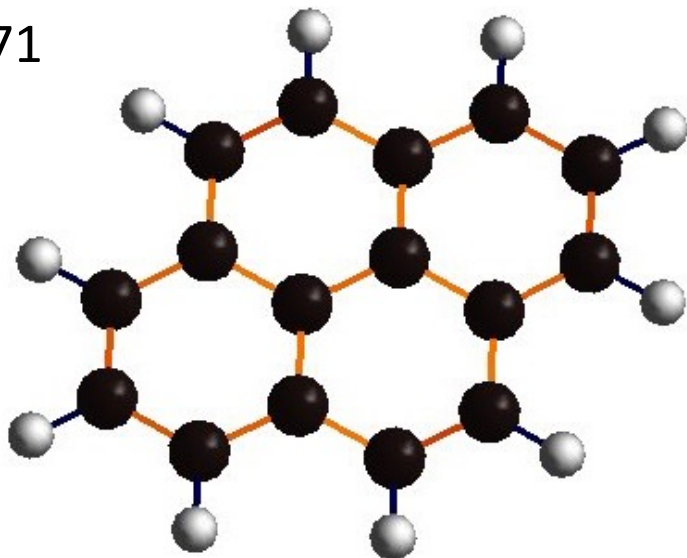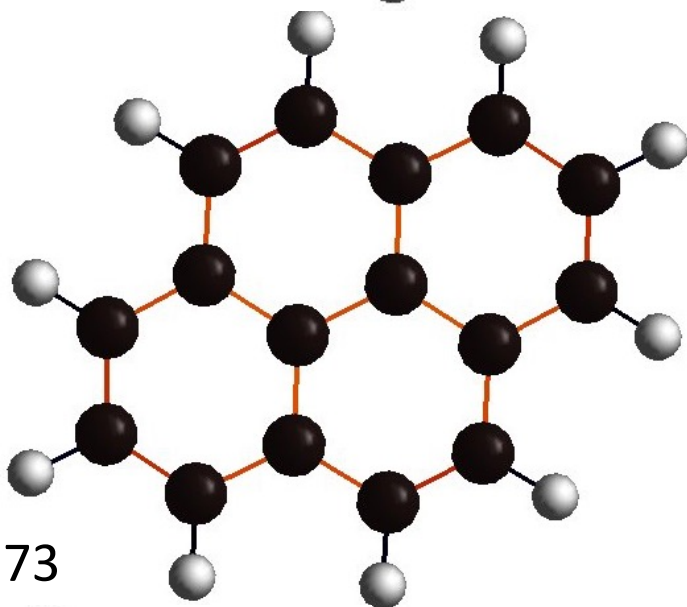

72

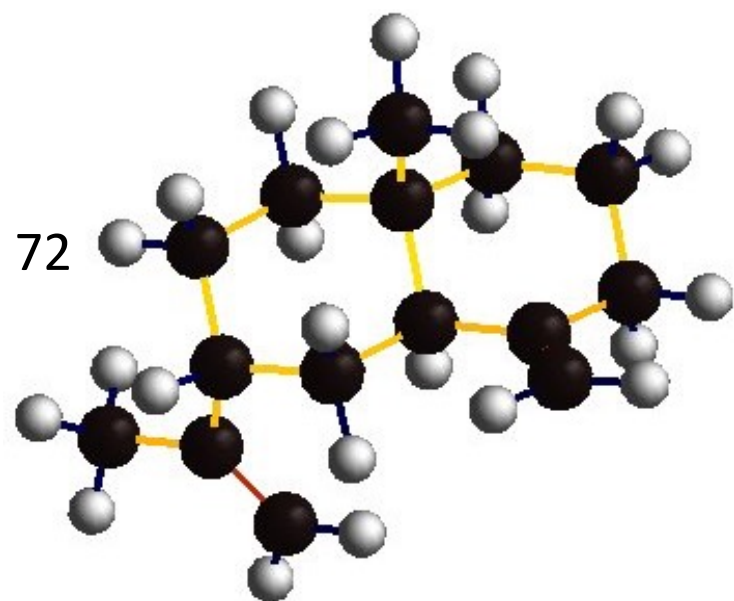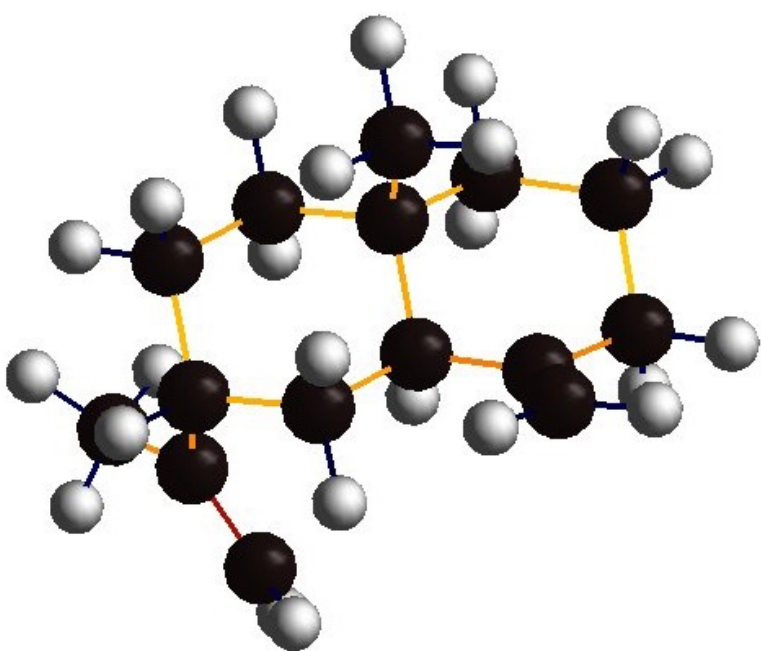

73

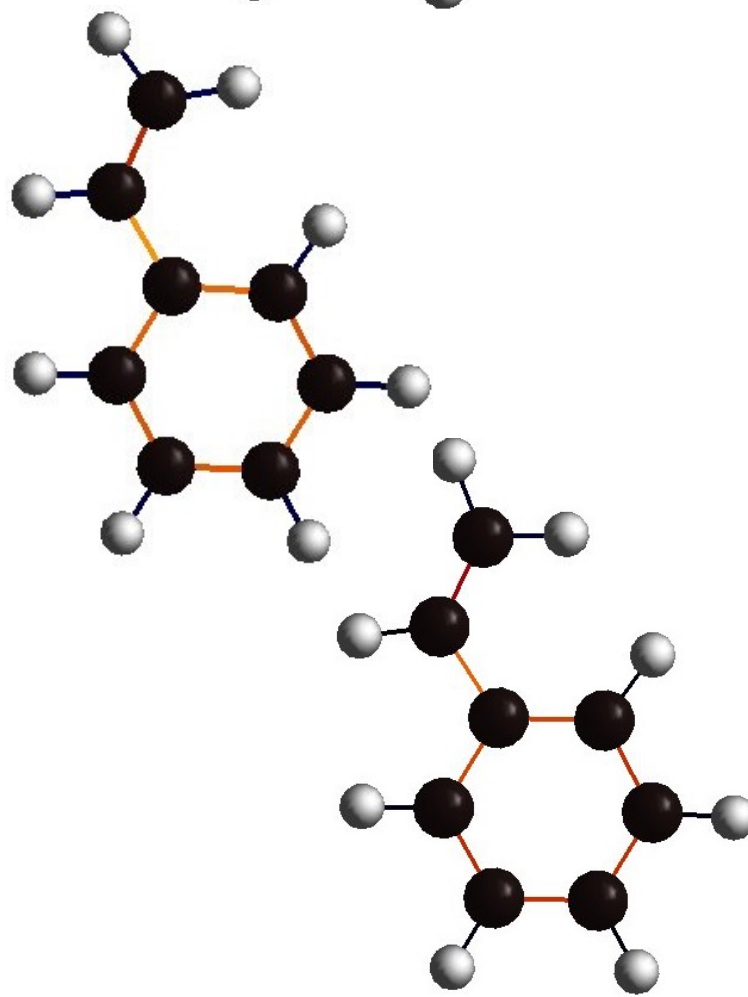

Supplement: d4cp02300e1.zip [file d4cp02300e1.zip]

53

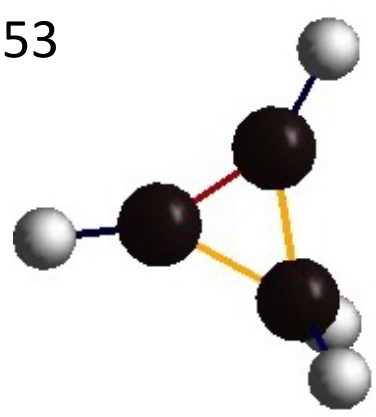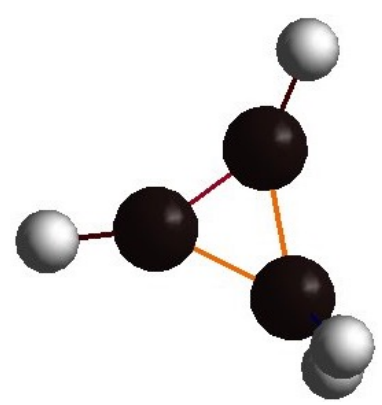

55

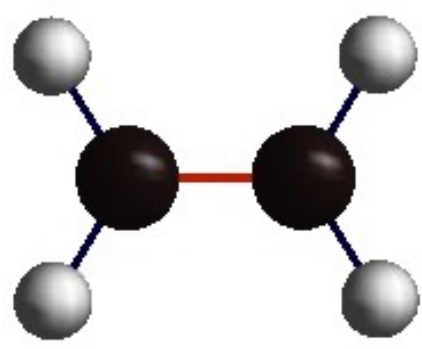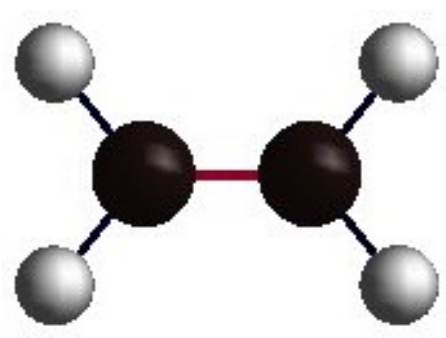

54

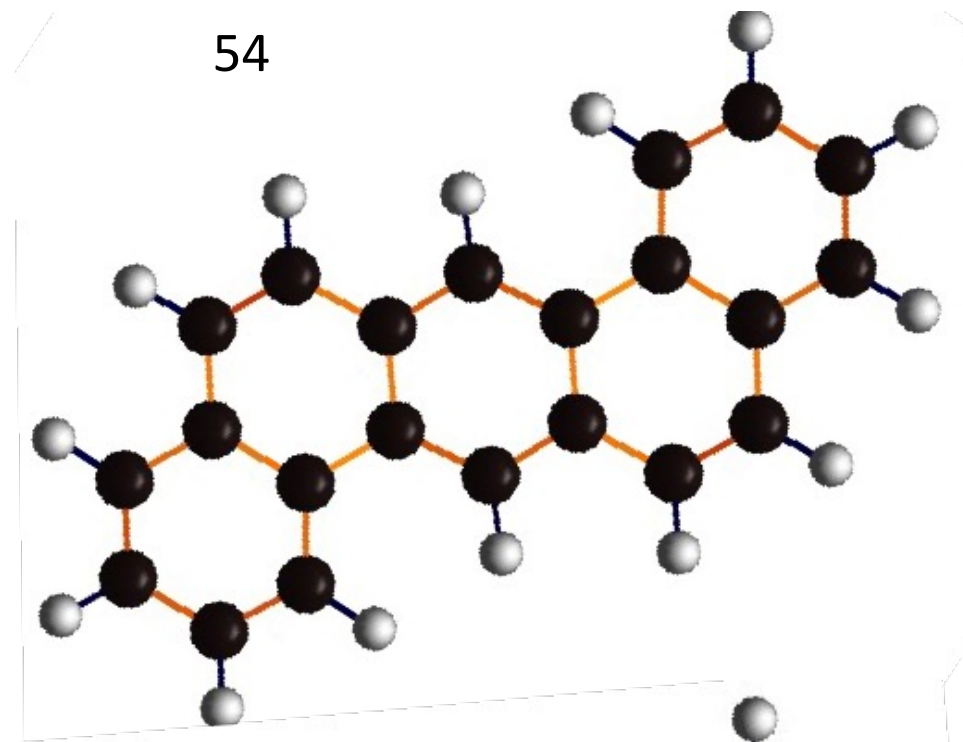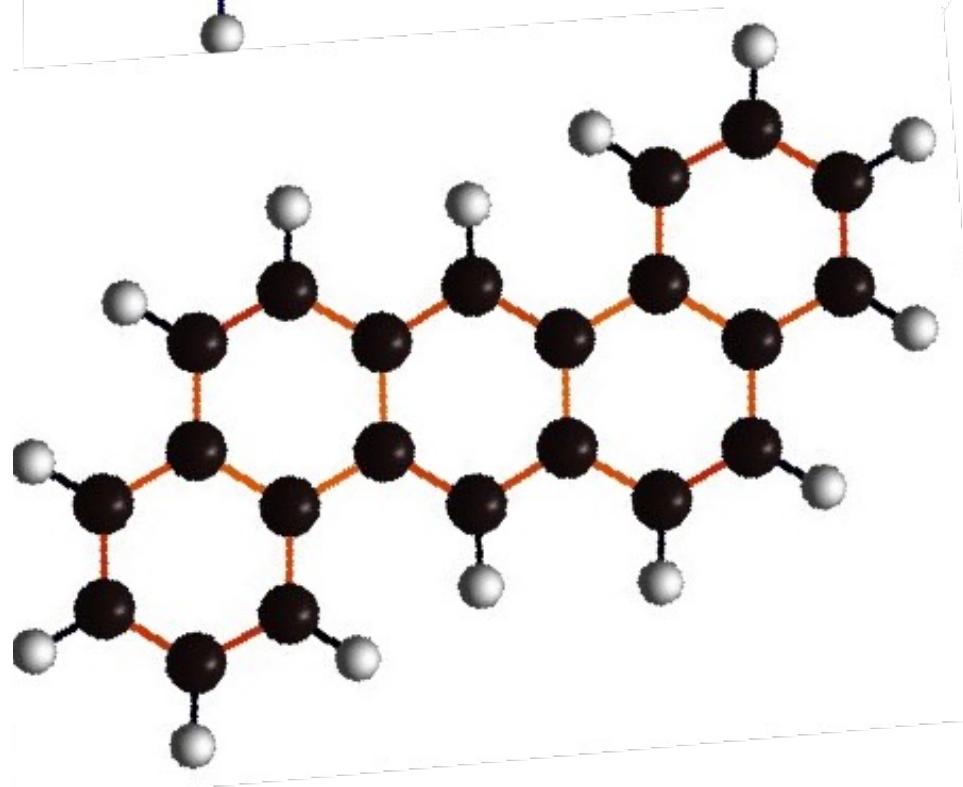

56

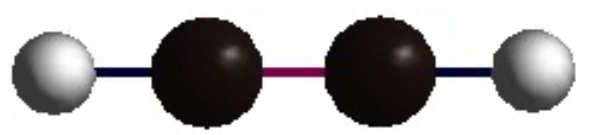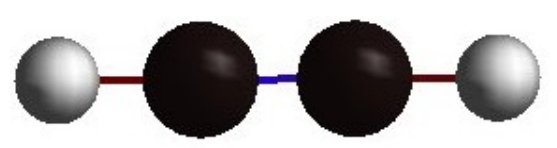

Supplement: d4cp02300e1.zip [file d4cp02300e1.zip]

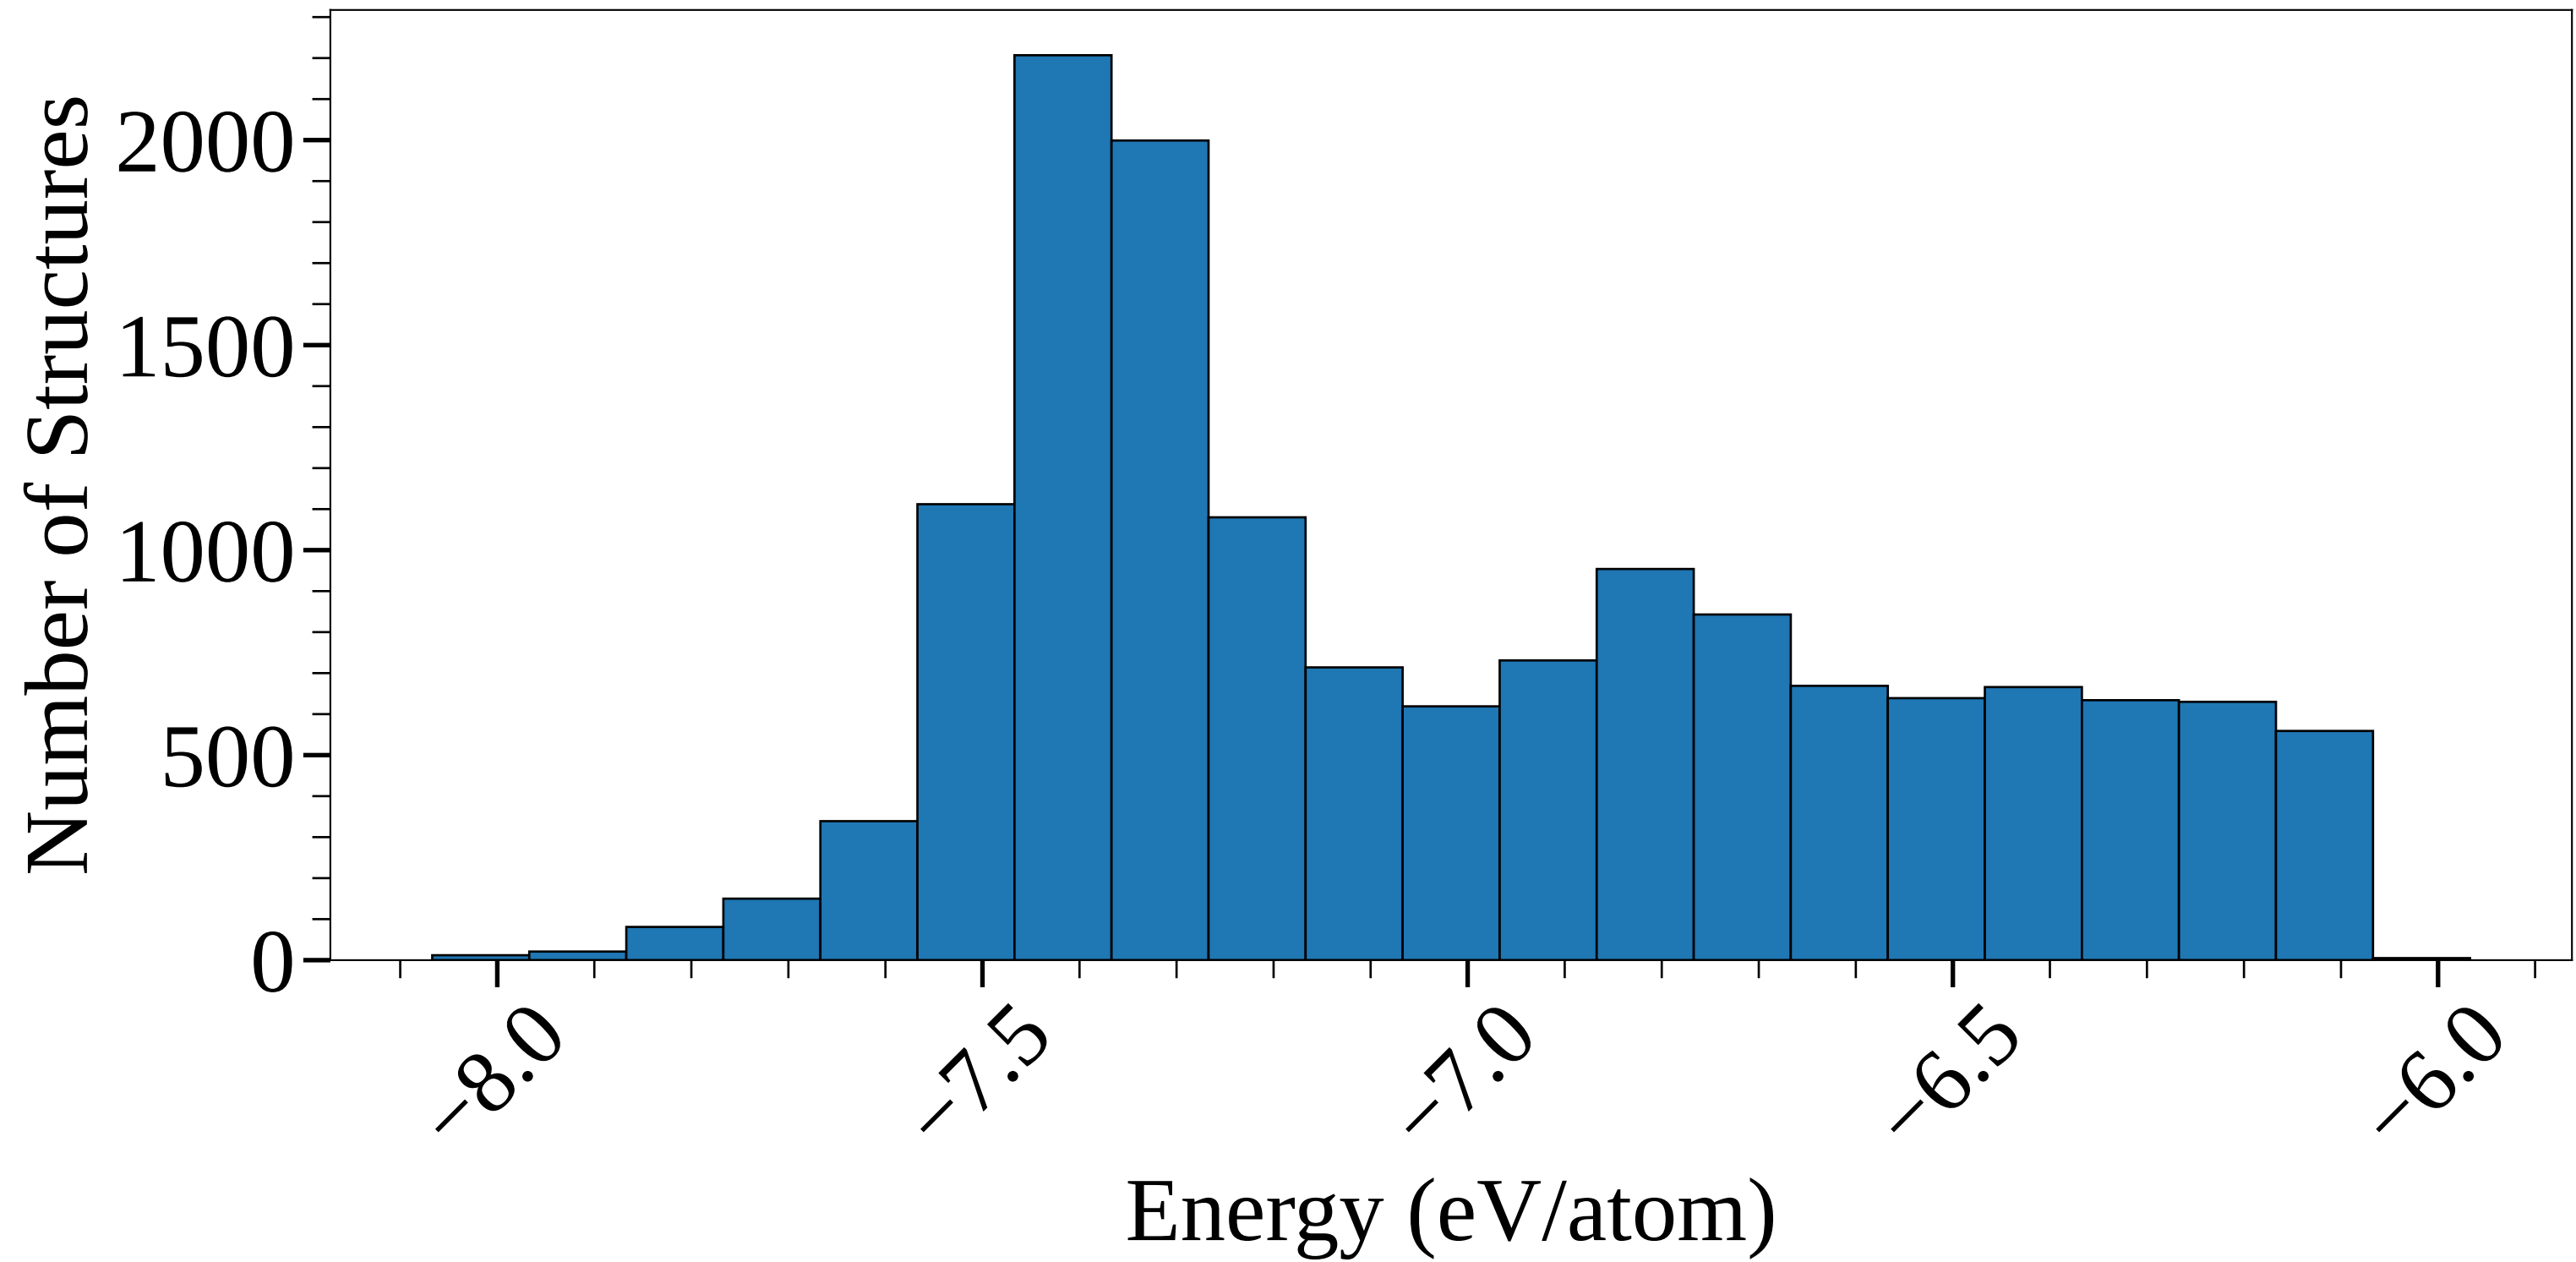

Supplement: d4cp02300e1.zip [file d4cp02300e1.zip]

86

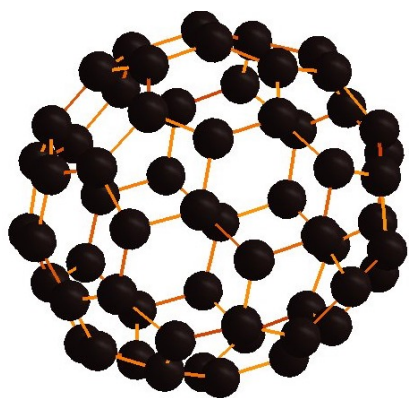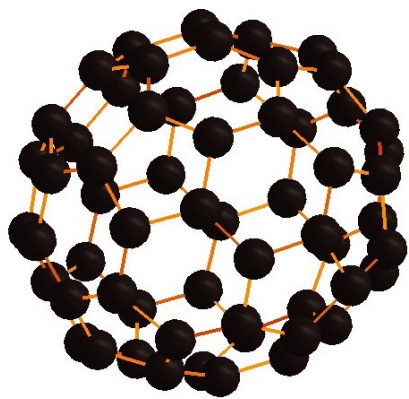

87

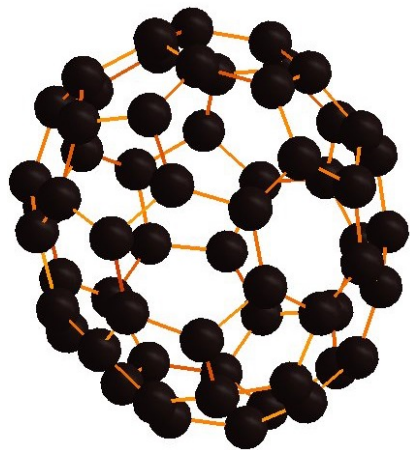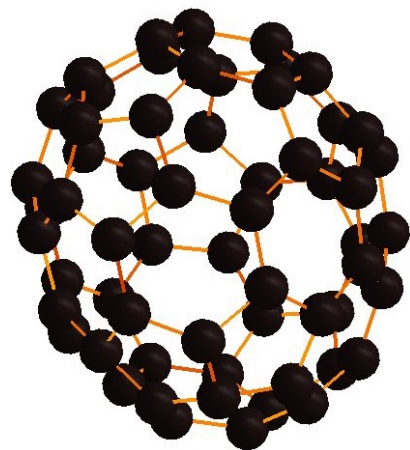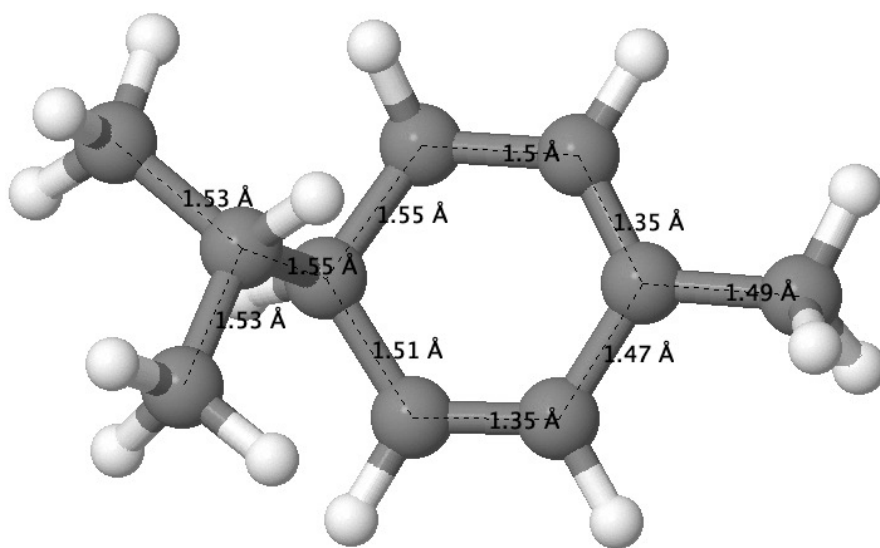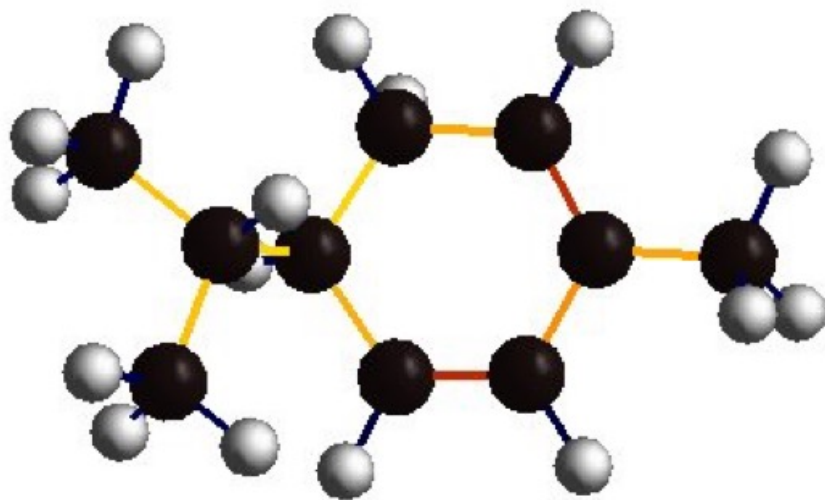

Supplement: d4cp02300e1.zip [file d4cp02300e1.zip]

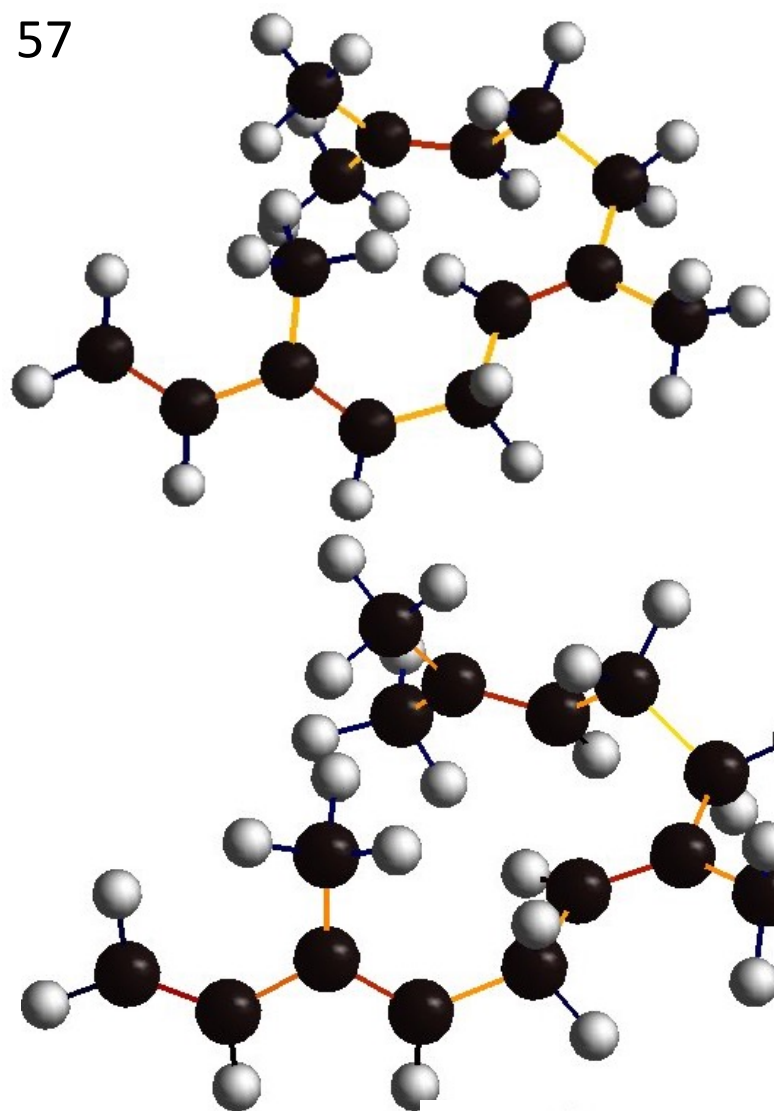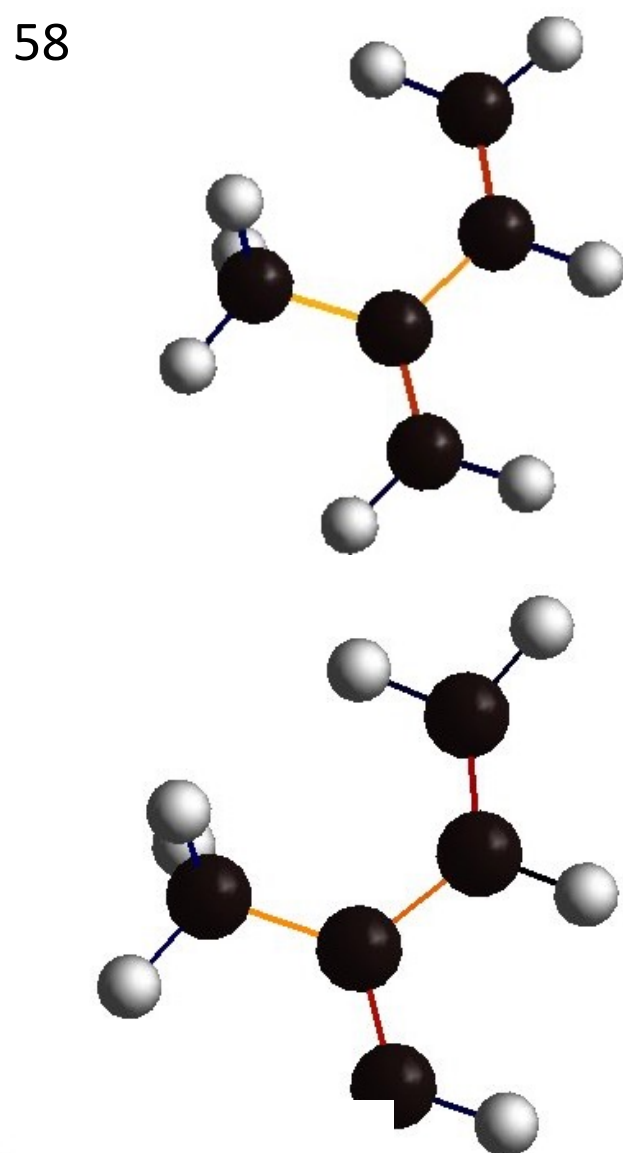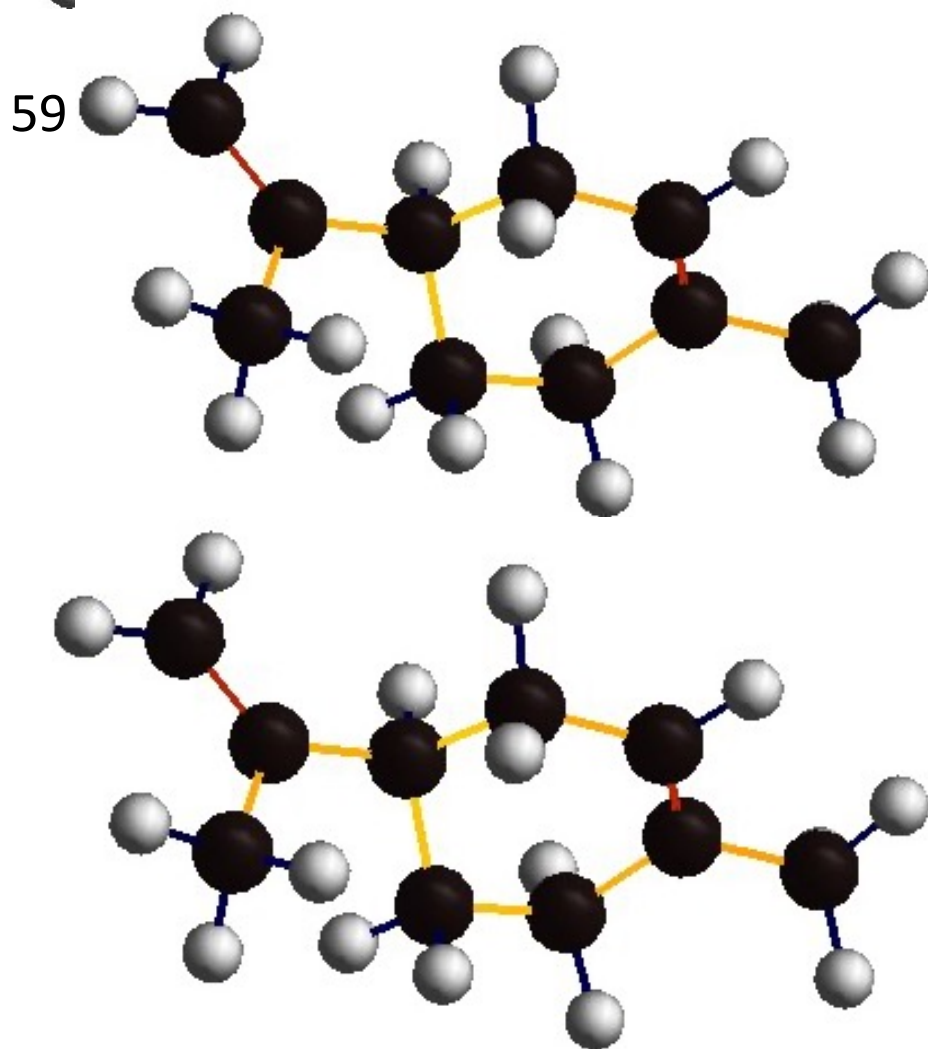

Supplement: d4cp02300e1.zip [file d4cp02300e1.zip]

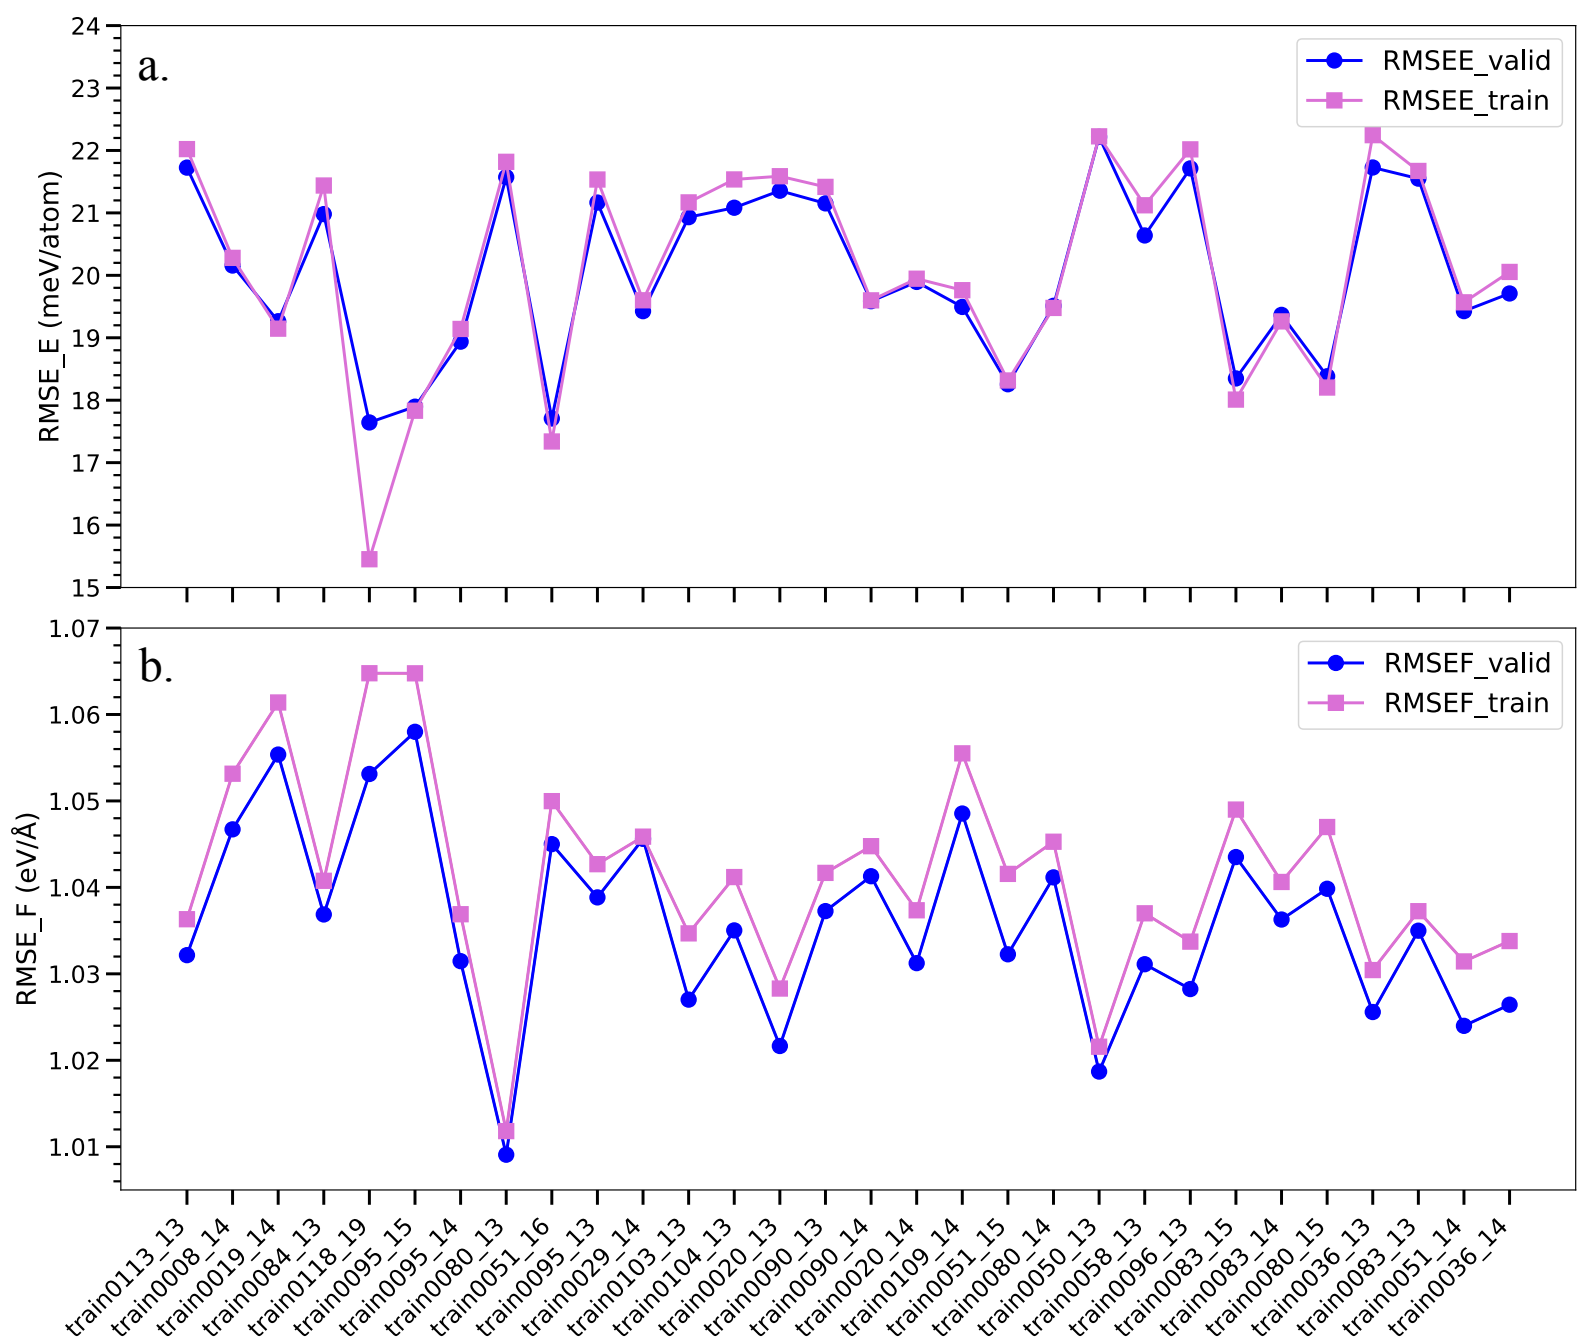

Supplement: d4cp02300e1.zip [file d4cp02300e1.zip]

Energy (eV)

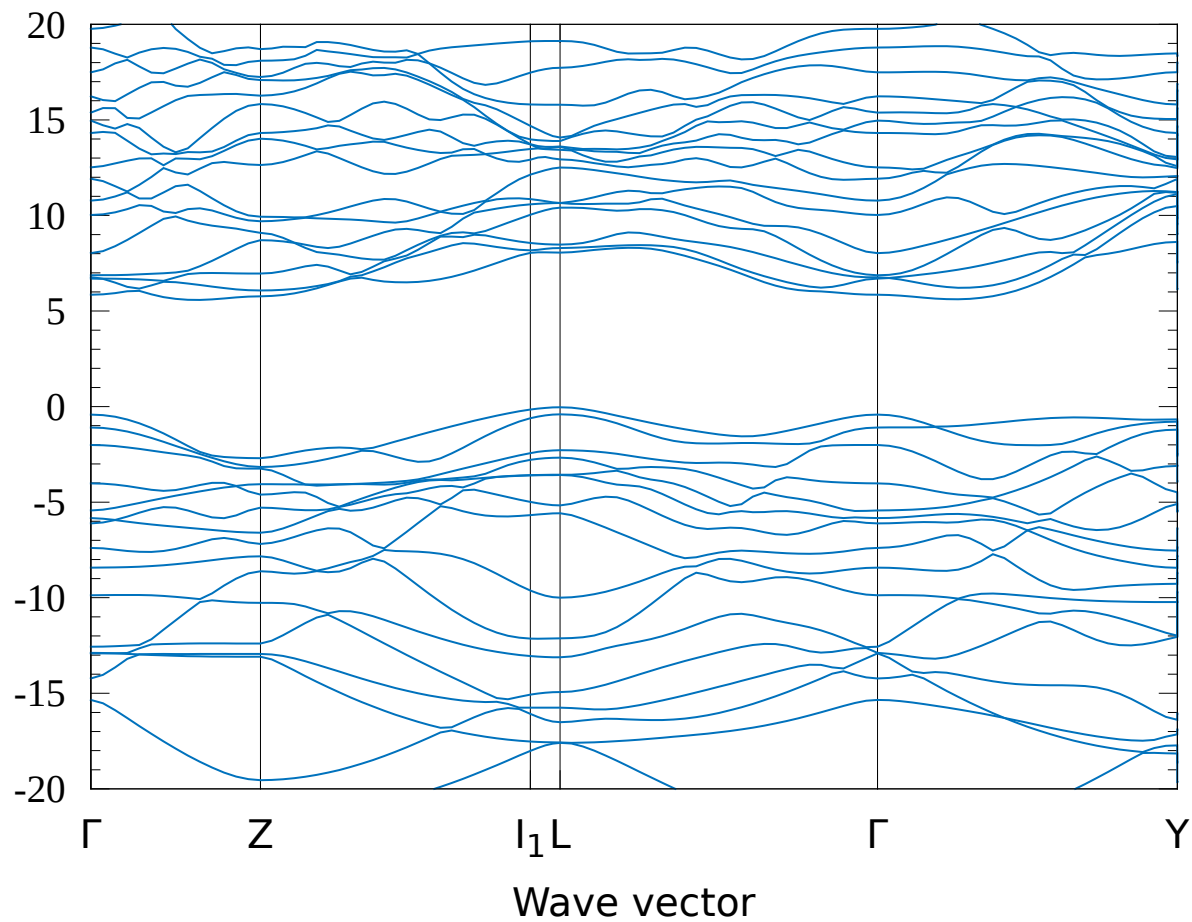

Supplement: d4cp02300e1.zip [file d4cp02300e1.zip]

(1)

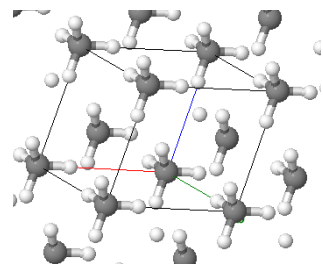

(2)

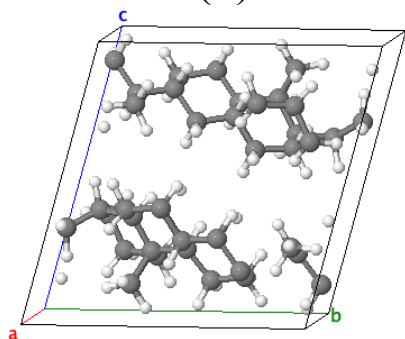

(3)

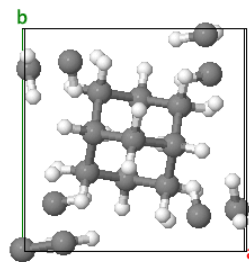

(4)

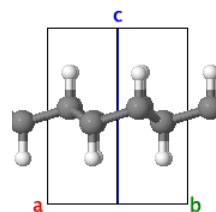

(5)

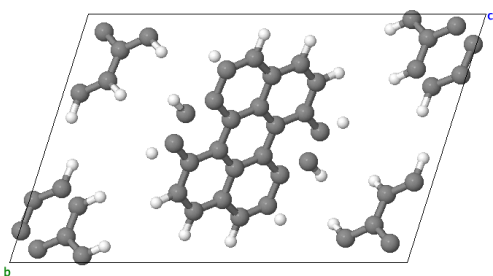

(6)

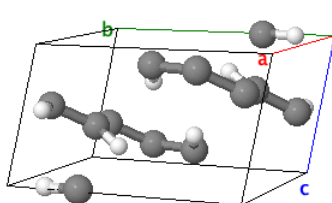

(7)

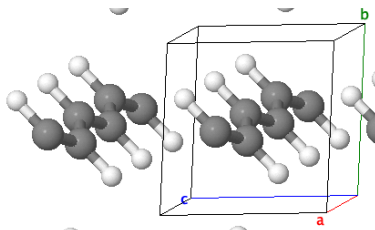

(8)

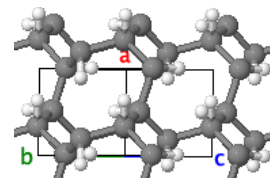

(9)

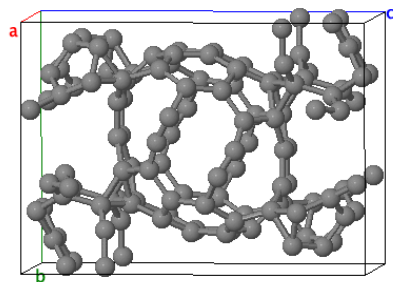

(10)

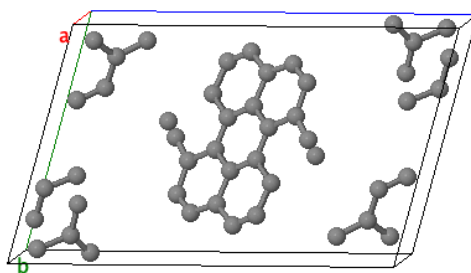

(11)

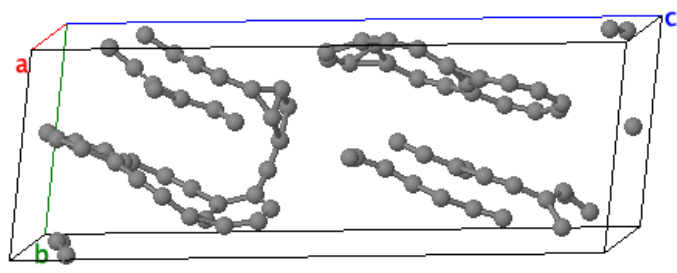

(12)

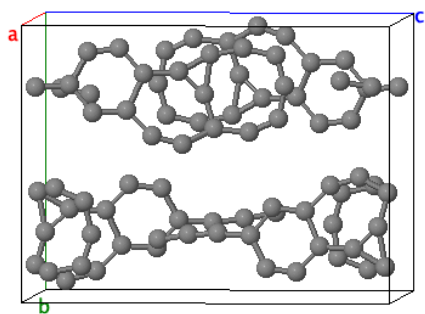

(13)

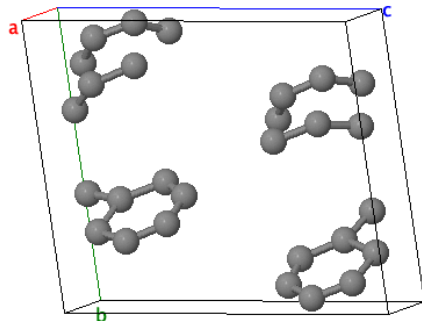

(14)

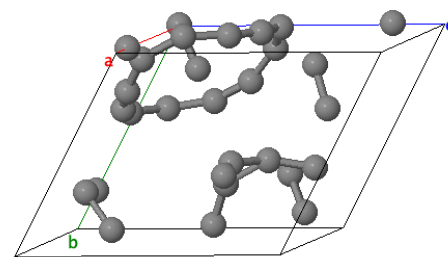

(15)

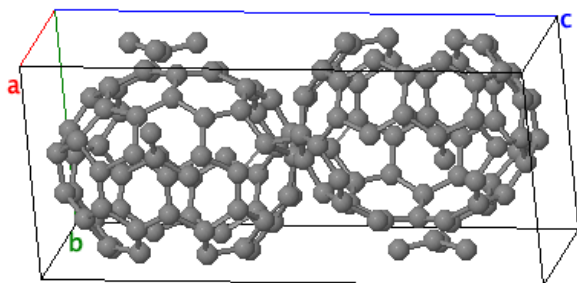

(16)

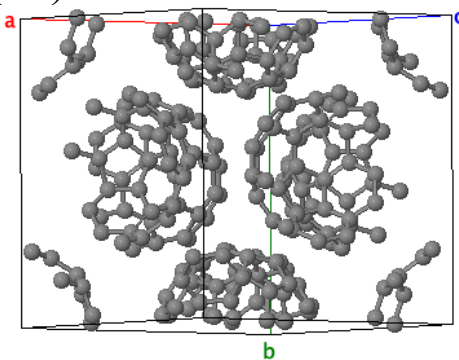

(17)

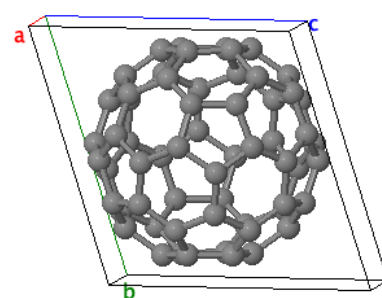

Supplement: d4cp02300e1.zip [file d4cp02300e1.zip]

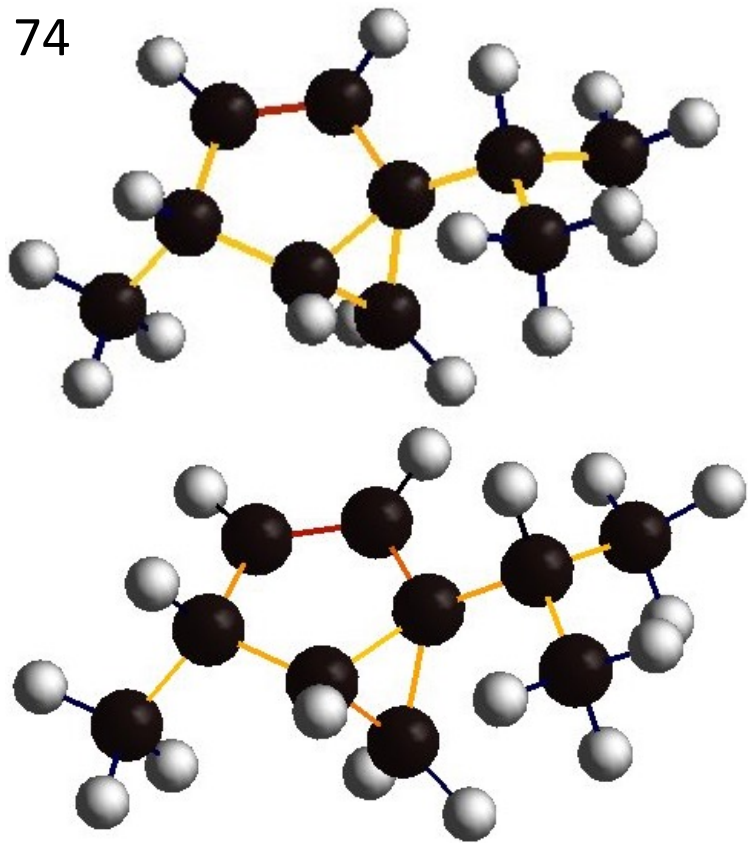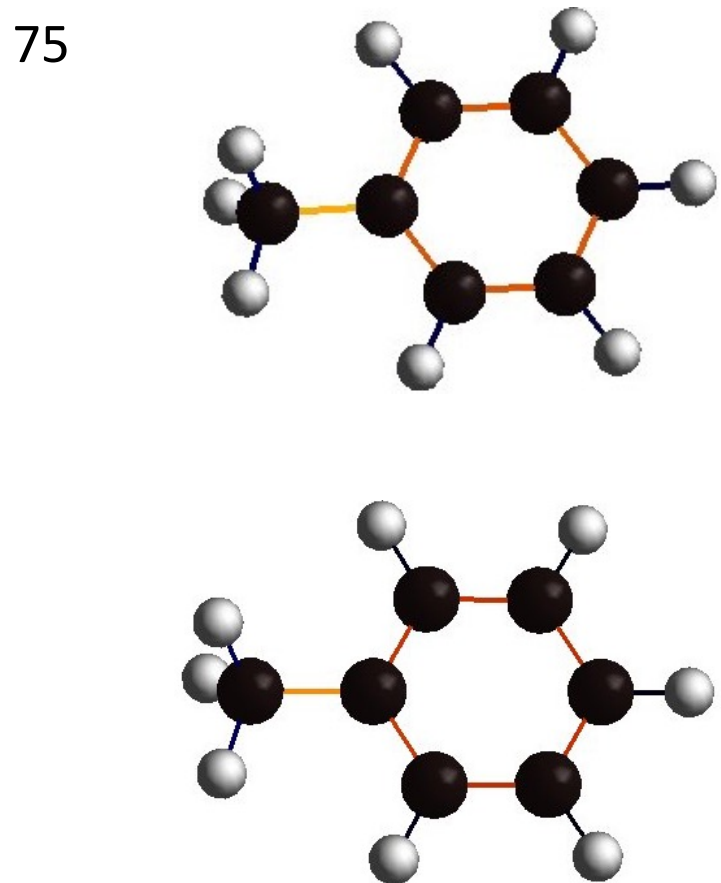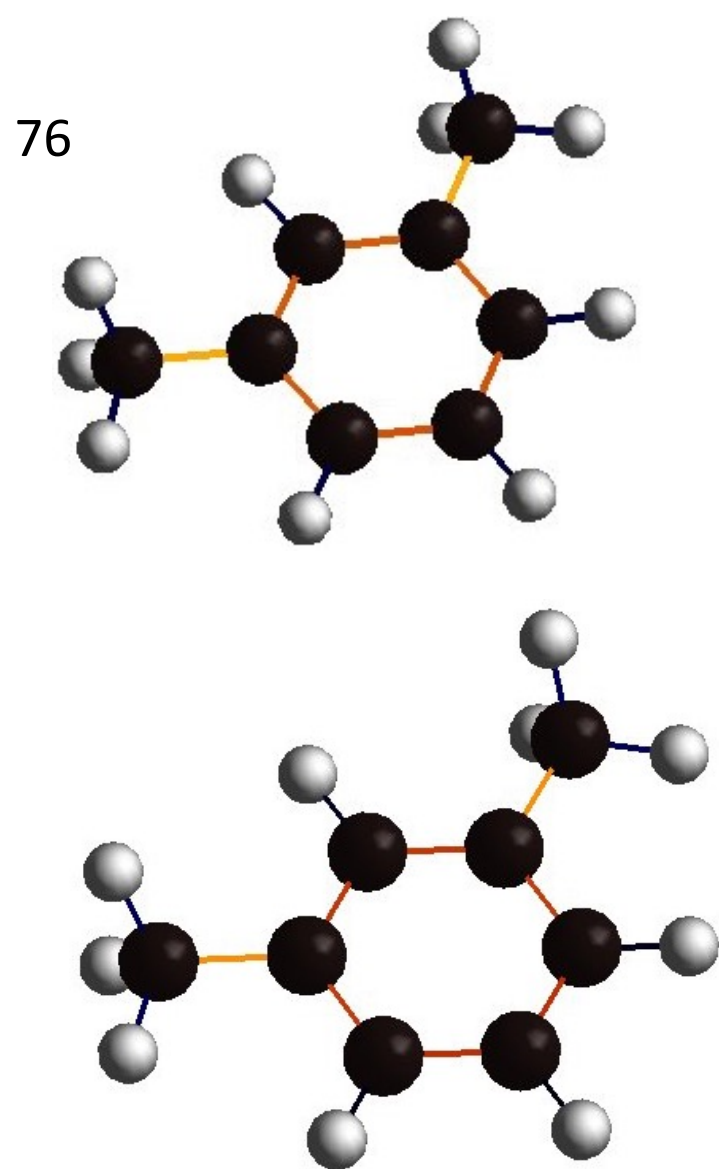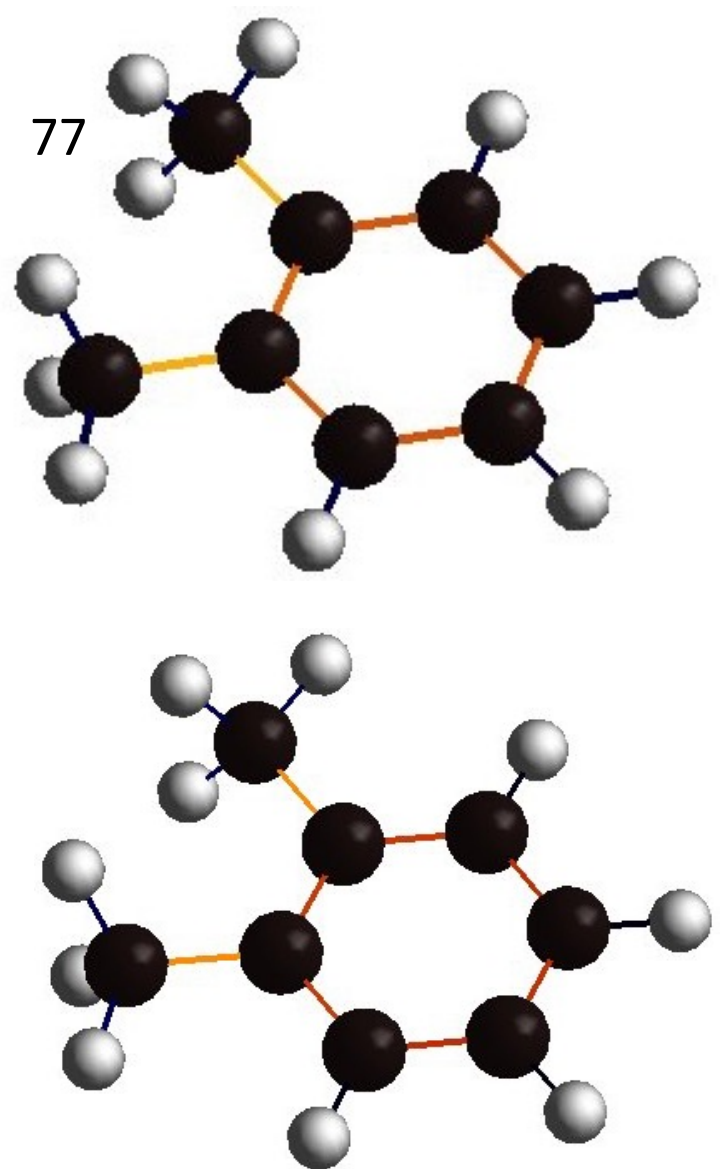

Supplement: d4cp02300e1.zip [file d4cp02300e1.zip]

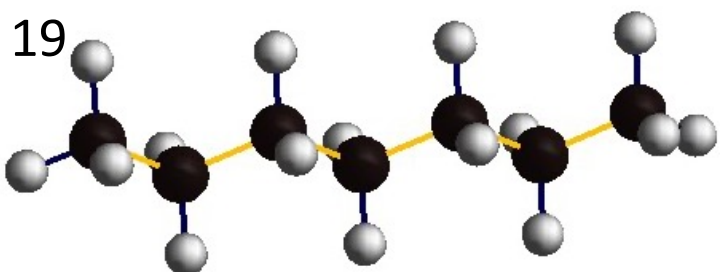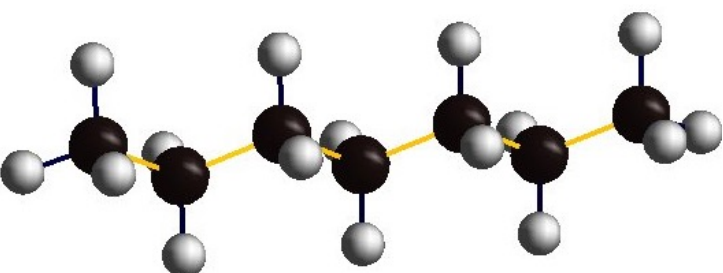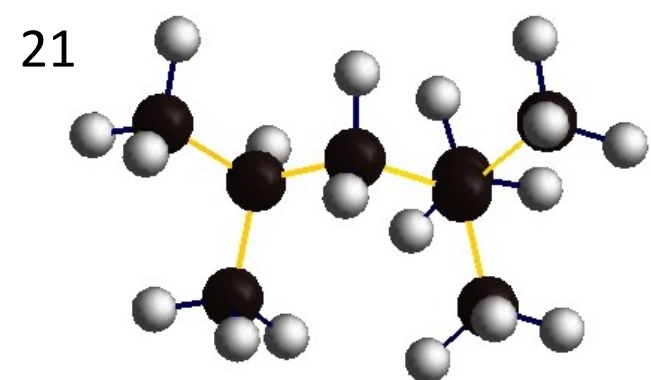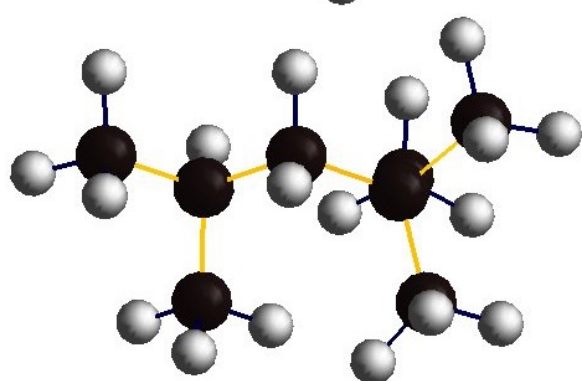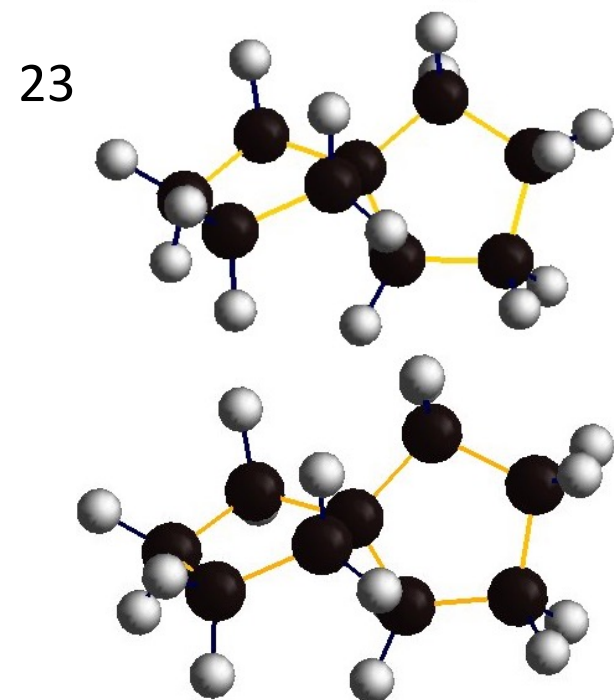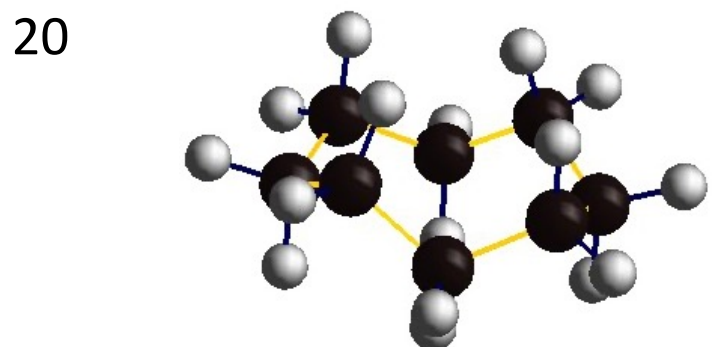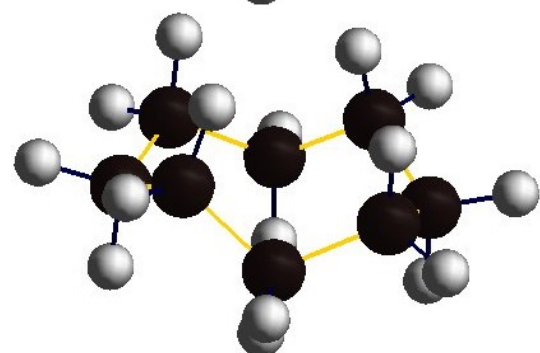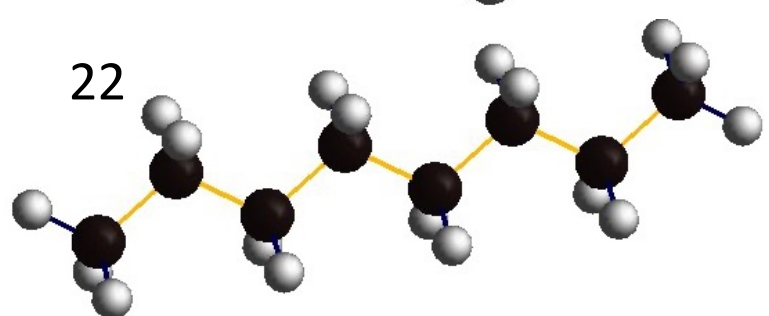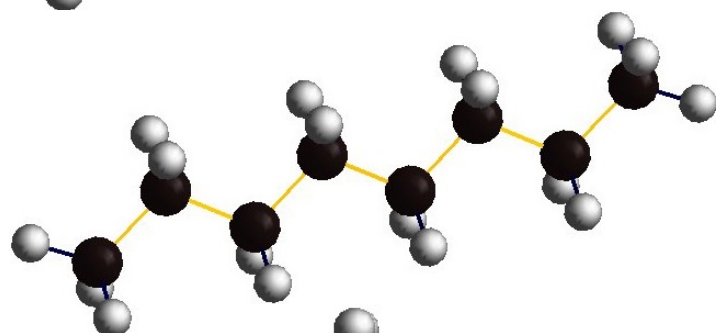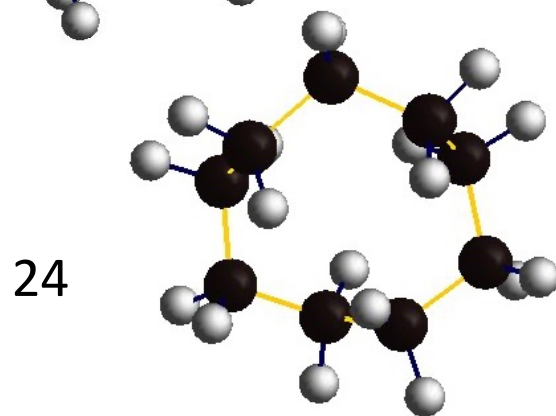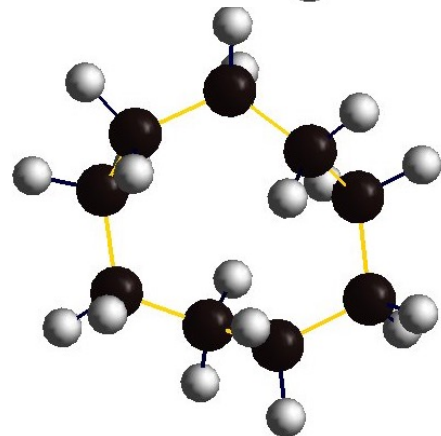

Supplement: d4cp02300e1.zip [file d4cp02300e1.zip]
